# Supplementary material for: Contributions of mean and shape of blood pressure distribution to worldwide trends and variations in raised blood pressure: a pooled analysis of 1018 population-based measurement studies with 88.6 million participants
Source: PubMed Central journal article supplement (PMC6005056; doi:10.1093/ije/dyy016), 2018-03-19
Supplement: dyy016_ije-2017-08-0945_supplementary_data_corrected.pdf [file dyy016_ije-2017-08-0945_supplementary_data_corrected.pdf]

## **Supplementary Data**

**Contributions of mean and shape of blood pressure distribution to global trends and variations in raised blood pressure: a pooled analysis of 1,018 population-based measurement studies with 88.6 million participants**

NCD Risk Factor Collaboration (NCD-RisC)

## Table of Contents

|                                                                                                                                                                                             |    |
|---------------------------------------------------------------------------------------------------------------------------------------------------------------------------------------------|----|
| <b>Supplement 1.</b> Inclusion and exclusion criteria.....                                                                                                                                  | 3  |
| <b>Supplementary Table 1.</b> List of analysis regions and countries in each region. ....                                                                                                   | 5  |
| <b>Supplementary Table 2.</b> Mean systolic and diastolic blood pressure by sex, age, and region.<br>Numbers in parentheses are the 95% credible intervals. ....                            | 6  |
| <b>Supplementary Table 3.</b> Number of studies and data points used in the analysis, by region.<br>.....                                                                                   | 15 |
| <b>Supplementary Table 4.</b> List of data sources used in the analysis and their characteristics.                                                                                          | 16 |
| <b>Supplementary Table 5.</b> Coefficients of the regression of the probit-transformed prevalence<br>of raised blood pressure on mean systolic and diastolic blood pressure for women. .... | 36 |
| <b>Supplementary Table 6.</b> Coefficients of the regression of the probit-transformed prevalence<br>of raised blood pressure on mean systolic and diastolic blood pressure for men. ....   | 38 |
| <b>References</b> .....                                                                                                                                                                     | 40 |

**Supplement 1. Inclusion and exclusion criteria.**

Data sources were included in NCD-RisC database if:

- measured data on systolic blood pressure (SBP) and/or diastolic blood pressure (DBP) were available;
- study participants were ten years of age and older;
- data were collected using a probabilistic sampling method with a defined sampling frame;
- data were from population samples at the national, sub-national, or community level;
- data were collected in or after 1950; and
- data were from the countries and territories listed in Supplementary Table 2.

We excluded all data sources that included only hypertension diagnosis history or medication status without measurement of blood pressure. We also excluded data sources on population subgroups whose blood pressure levels may differ systematically from the general population, including:

- studies that had included or excluded people based on their health status or cardiovascular risk;
- studies whose participants were only ethnic minorities;
- specific educational, occupational, or socioeconomic subgroups, with the exception noted below;
- those recruited through health facilities, with the exception noted below; and
- women aged 15-19 years in surveys which sampled only ever-married women or measured height and weight only among mothers.

We used school-based data in countries, and in age-sex groups, with school enrolment of 70% or higher. We used data whose sampling frame was health insurance schemes in countries where at least 80% of the population were insured. Finally, we used data collected through general practice and primary care system in high-income countries with universal insurance, because contact with the primary care systems tends to be at least as good as response rates for population-based surveys.

**Supplementary Table 1.** List of analysis regions and countries in each region.

| <b>Region</b>                                          | <b>Countries</b>                                                                                                                                                                                                                                                                                                                                                                                                                                                                                               |
|--------------------------------------------------------|----------------------------------------------------------------------------------------------------------------------------------------------------------------------------------------------------------------------------------------------------------------------------------------------------------------------------------------------------------------------------------------------------------------------------------------------------------------------------------------------------------------|
| <b>Sub-Saharan Africa (48)</b>                         | Angola, Benin, Botswana, Burkina Faso, Burundi, Cabo Verde, Cameroon, Central African Republic, Chad, Comoros, Congo, Cote d'Ivoire, Djibouti, DR Congo, Eritrea, Ethiopia, Equatorial Guinea, Gabon, Gambia, Ghana, Guinea, Guinea Bissau, Kenya, Lesotho, Liberia, Madagascar, Malawi, Mali, Mauritania, Mauritius, Mozambique, Namibia, Niger, Nigeria, Rwanda, Sao Tome and Principe, Senegal, Seychelles, Sierra Leone, Somalia, South Africa, Sudan, Swaziland, Tanzania, Togo, Uganda, Zambia, Zimbabwe |
| <b>Central Asia, Middle East and north Africa (28)</b> | Algeria, Armenia, Azerbaijan, Bahrain, Egypt, Georgia, Iran, Iraq, Jordan, Kazakhstan, Kuwait, Kyrgyzstan, Lebanon, Libya, Morocco, Mongolia, Occupied Palestinian Territory, Oman, Qatar, Saudi Arabia, Syrian Arab Republic, Tajikistan, Tunisia, Turkey, Turkmenistan, United Arab Emirates, Uzbekistan, Yemen                                                                                                                                                                                              |
| <b>South Asia (6)</b>                                  | Afghanistan, Bangladesh, Bhutan, India, Nepal, Pakistan                                                                                                                                                                                                                                                                                                                                                                                                                                                        |
| <b>East and southeast Asia (16)</b>                    | Brunei Darussalam, Cambodia, China, China (Hong Kong SAR), Indonesia, Lao PDR, Malaysia, Maldives, Myanmar, North Korea, Philippines, Sri Lanka, Taiwan, Thailand, Timor-Leste, Viet Nam                                                                                                                                                                                                                                                                                                                       |
| <b>Oceania (17)</b>                                    | American Samoa, Cook Islands, Fiji, French Polynesia, Kiribati, Marshall Islands, Micronesia (Federated States of), Nauru, Niue, Palau, Papua New Guinea, Samoa, Solomon Islands, Tokelau, Tonga, Tuvalu, Vanuatu                                                                                                                                                                                                                                                                                              |
| <b>High-income Asia Pacific (3)</b>                    | Japan, Singapore, South Korea                                                                                                                                                                                                                                                                                                                                                                                                                                                                                  |
| <b>Latin America and the Caribbean (35)</b>            | Antigua and Barbuda, Argentina, Bahamas, Barbados, Belize, Bermuda, Bolivia, Brazil, Chile, Cuba, Colombia, Costa Rica, Dominica, Dominican Republic, Ecuador, El Salvador, Grenada, Guatemala, Guyana, Haiti, Honduras, Jamaica, Mexico, Nicaragua, Panama, Paraguay, Peru, Puerto Rico, Saint Kitts and Nevis, Saint Lucia, Saint Vincent and the Grenadines, Suriname, Trinidad and Tobago, Uruguay, Venezuela                                                                                              |
| <b>High-income western (27)</b>                        | Andorra, Austria, Australia, Belgium, Canada, Cyprus, Denmark, Finland, France, Germany, Greece, Greenland, Iceland, Ireland, Israel, Italy, Luxembourg, Malta, Netherlands, New Zealand, Norway, Portugal, Spain, Sweden, Switzerland, United Kingdom, United States of America                                                                                                                                                                                                                               |
| <b>Central and eastern Europe (20)</b>                 | Albania, Belarus, Bosnia and Herzegovina, Bulgaria, Croatia, Czech Republic, Estonia, Hungary, Latvia, Lithuania, Macedonia (TFYR), Moldova, Montenegro, Poland, Russian Federation, Romania, Serbia, Slovakia, Slovenia, Ukraine                                                                                                                                                                                                                                                                              |

**Supplementary Table 2.** Mean systolic and diastolic blood pressure by sex, age, and region. Numbers in parentheses are the 95% credible intervals.

| <b>Mean systolic blood pressure (mmHg)</b> |                     |                     |                     |
|--------------------------------------------|---------------------|---------------------|---------------------|
| <b>Super-region (Men)</b>                  | <b>Year</b>         |                     |                     |
|                                            | <b>1985-1994</b>    | <b>1995-2004</b>    | <b>2005-2016</b>    |
| <b>20-29 years</b>                         |                     |                     |                     |
| World                                      | 119.2 (118.3-120.1) | 119.6 (119.0-120.1) | 120.3 (119.7-120.9) |
| Central and eastern Europe                 | 124.6 (123.3-126.0) | 123.9 (122.4-125.3) | 124.1 (122.4-125.8) |
| Central Asia, Middle East and north Africa | 119.4 (117.5-121.2) | 119.1 (117.9-120.3) | 119.6 (118.4-120.8) |
| East and southeast Asia                    | 116.0 (114.9-117.2) | 117.1 (116.0-118.0) | 118.3 (117.1-119.5) |
| High-income Asia Pacific                   | 121.0 (119.6-122.3) | 119.4 (118.3-120.4) | 117.6 (116.5-118.7) |
| High-income western                        | 123.2 (122.3-124.0) | 121.3 (120.6-122.1) | 120.2 (119.3-121.2) |
| Latin America and Caribbean                | 121.9 (120.2-123.7) | 121.2 (120.1-122.4) | 121.7 (120.6-122.9) |
| Oceania                                    | 121.0 (118.5-123.7) | 122.0 (119.1-124.9) | 123.2 (119.9-126.6) |
| South Asia                                 | 118.7 (116.3-121.0) | 119.9 (118.3-121.4) | 121.2 (119.9-122.6) |
| Sub-Saharan Africa                         | 121.3 (119.7-122.9) | 121.6 (120.3-122.9) | 121.8 (120.6-123.1) |
| <b>30-39 years</b>                         |                     |                     |                     |
| World                                      | 121.7 (120.8-122.6) | 121.7 (121.1-122.3) | 122.5 (121.8-123.1) |
| Central and eastern Europe                 | 128.1 (126.7-129.4) | 127.2 (125.7-128.6) | 127.6 (125.9-129.2) |
| Central Asia, Middle East and north Africa | 121.8 (119.9-123.6) | 121.5 (120.4-122.7) | 121.8 (120.6-122.9) |
| East and southeast Asia                    | 118.3 (117.1-119.5) | 119.3 (118.3-120.3) | 120.7 (119.5-122.0) |
| High-income Asia Pacific                   | 124.1 (122.7-125.4) | 122.2 (121.1-123.3) | 120.5 (119.3-121.7) |
| High-income western                        | 124.6 (123.7-125.6) | 123.3 (122.5-124.0) | 122.0 (121.1-123.0) |
| Latin America and Caribbean                | 124.4 (122.6-126.3) | 123.6 (122.5-124.8) | 124.1 (123.0-125.4) |
| Oceania                                    | 121.1 (118.5-123.7) | 122.2 (119.3-125.0) | 123.3 (119.9-126.8) |
| South Asia                                 | 120.4 (118.0-122.8) | 121.6 (119.9-123.1) | 122.9 (121.5-124.4) |
| Sub-Saharan Africa                         | 124.1 (122.5-125.8) | 124.5 (123.1-125.8) | 124.6 (123.4-125.9) |
| <b>40-49 years</b>                         |                     |                     |                     |
| World                                      | 125.5 (124.6-126.5) | 125.4 (124.7-126.0) | 125.9 (125.2-126.6) |
| Central and eastern Europe                 | 132.9 (131.4-134.3) | 131.9 (130.3-133.4) | 132.2 (130.3-134.1) |
| Central Asia, Middle East and north Africa | 125.7 (123.6-127.7) | 125.5 (124.2-126.8) | 125.8 (124.6-127.0) |
| East and southeast Asia                    | 122.2 (120.8-123.4) | 123.2 (122.1-124.3) | 124.7 (123.3-126.1) |
| High-income Asia Pacific                   | 128.6 (127.2-129.9) | 126.1 (124.9-127.3) | 124.0 (122.6-125.2) |
| High-income western                        | 128.4 (127.4-129.4) | 126.2 (125.3-127.0) | 125.2 (124.1-126.2) |
| Latin America and Caribbean                | 128.1 (126.1-130.1) | 127.3 (126.0-128.6) | 127.9 (126.6-129.2) |
| Oceania                                    | 122.7 (119.8-125.6) | 124.0 (120.9-127.1) | 125.3 (121.7-129.0) |
| South Asia                                 | 122.8 (120.1-125.4) | 124.2 (122.5-125.9) | 125.6 (124.1-127.2) |
| Sub-Saharan Africa                         | 128.2 (126.4-130.0) | 128.6 (127.1-130.1) | 128.7 (127.4-130.1) |
| <b>50-59 years</b>                         |                     |                     |                     |
| World                                      | 132.1 (130.9-133.1) | 131.8 (131-132.5.0) | 132.3 (131.5-133.1) |
| Central and eastern Europe                 | 140.5 (138.7-142.2) | 139.5 (137.7-141.2) | 139.8 (137.5-142.0) |
| Central Asia, Middle East and north Africa | 132.6 (130.1-134.9) | 132.2 (130.7-133.7) | 132.7 (131.2-134.1) |
| East and southeast Asia                    | 128.5 (127.0-130.1) | 129.8 (128.5-131.1) | 131.5 (129.9-133.2) |
| High-income Asia Pacific                   | 135.2 (133.6-136.8) | 132.6 (131.2-134.1) | 130.0 (128.4-131.5) |
| High-income western                        | 135.4 (134.2-136.5) | 132.6 (131.7-133.6) | 130.7 (129.5-132.0) |
| Latin America and Caribbean                | 134.5 (132.1-136.8) | 133.5 (132.0-135.0) | 134.2 (132.7-135.8) |
| Oceania                                    | 126.9 (123.5-130.4) | 128.4 (124.6-132.3) | 130.1 (125.9-134.3) |

| <b>Mean systolic blood pressure (mmHg)</b> |                     |                     |                     |
|--------------------------------------------|---------------------|---------------------|---------------------|
| <b>Super-region (Men)</b>                  | <b>Year</b>         |                     |                     |
|                                            | <b>1985-1994</b>    | <b>1995-2004</b>    | <b>2005-2016</b>    |
| South Asia                                 | 127.5 (124.3-130.6) | 129.2 (127.1-131.1) | 131.0 (129.2-132.9) |
| Sub-Saharan Africa                         | 134.9 (132.7-137.1) | 135.4 (133.6-137.1) | 135.5 (133.9-137.1) |
| <b>60-69 years</b>                         |                     |                     |                     |
| World                                      | 138.0 (136.8-139.3) | 137.8 (137.0-138.6) | 138.1 (137.2-139.0) |
| Central and eastern Europe                 | 147.3 (145.2-149.3) | 146.0 (143.8-148.1) | 146.6 (144.2-148.9) |
| Central Asia, Middle East and north Africa | 139.0 (136.1-141.7) | 138.7 (137.0-140.4) | 139.0 (137.4-140.6) |
| East and southeast Asia                    | 134.5 (132.7-136.2) | 135.9 (134.4-137.4) | 137.9 (135.9-139.8) |
| High-income Asia Pacific                   | 141.3 (139.5-143.0) | 138.1 (136.5-139.7) | 135.9 (133.9-137.7) |
| High-income western                        | 141.1 (139.8-142.4) | 139.0 (137.9-140.0) | 136.5 (135.1-137.9) |
| Latin America and Caribbean                | 140.2 (137.5-142.9) | 139.0 (137.3-140.7) | 139.8 (138.0-141.6) |
| Oceania                                    | 131.1 (127.0-135.3) | 132.6 (128.2-137.2) | 134.5 (129.6-139.4) |
| South Asia                                 | 132.0 (128.3-135.5) | 133.9 (131.5-136.1) | 135.9 (133.8-138.0) |
| Sub-Saharan Africa                         | 140.7 (138.2-143.2) | 141.3 (139.2-143.2) | 141.5 (139.6-143.4) |
| <b>70-79 years</b>                         |                     |                     |                     |
| World                                      | 141.1 (139.8-142.4) | 141.1 (140.2-142.0) | 141.4 (140.4-142.4) |
| Central and eastern Europe                 | 150.5 (148.1-152.8) | 149.2 (146.8-151.6) | 149.7 (147.0-152.5) |
| Central Asia, Middle East and north Africa | 142.8 (139.7-145.8) | 142.5 (140.4-144.4) | 142.7 (140.9-144.5) |
| East and southeast Asia                    | 137.8 (135.9-139.7) | 139.4 (137.7-141.0) | 141.5 (139.3-143.6) |
| High-income Asia Pacific                   | 144.3 (142.4-146.1) | 141.0 (139.2-142.8) | 138.5 (136.3-140.6) |
| High-income western                        | 144.0 (142.6-145.5) | 141.9 (140.8-143.1) | 139.9 (138.4-141.4) |
| Latin America and Caribbean                | 142.9 (139.9-145.8) | 141.6 (139.7-143.6) | 142.3 (140.4-144.3) |
| Oceania                                    | 133.3 (128.5-138.3) | 134.7 (129.6-139.9) | 136.6 (130.9-142.2) |
| South Asia                                 | 134.5 (130.6-138.4) | 136.6 (133.9-139.1) | 138.7 (136.5-141.1) |
| Sub-Saharan Africa                         | 143.5 (140.7-146.3) | 144.1 (141.8-146.3) | 144.5 (142.4-146.7) |

| <b>Mean systolic blood pressure (mmHg)</b> |                     |                     |                     |
|--------------------------------------------|---------------------|---------------------|---------------------|
| <b>Super-region (Women)</b>                | <b>Year</b>         |                     |                     |
|                                            | <b>1985-1994</b>    | <b>1995-2004</b>    | <b>2005-2016</b>    |
| <b>20-29 years</b>                         |                     |                     |                     |
| World                                      | 111.8 (111.0-112.5) | 111.8 (111.3-112.3) | 112.0 (111.5-112.6) |
| Central and eastern Europe                 | 115.8 (114.6-117.0) | 114.0 (112.8-115.3) | 112.4 (110.9-113.9) |
| Central Asia, Middle East and north Africa | 114.6 (113.0-116.2) | 113.6 (112.5-114.8) | 112.4 (111.3-113.4) |
| East and southeast Asia                    | 108.7 (107.7-109.7) | 109.0 (108.2-109.8) | 109.8 (108.8-110.8) |
| High-income Asia Pacific                   | 110.3 (109.2-111.5) | 108.3 (107.4-109.2) | 106.2 (105.2-107.1) |
| High-income western                        | 112.1 (111.3-112.8) | 110.2 (109.6-110.8) | 108.7 (107.9-109.5) |
| Latin America and Caribbean                | 113.4 (111.8-114.9) | 111.9 (110.9-112.8) | 111.2 (110.3-112.2) |
| Oceania                                    | 112.7 (110.3-115.0) | 114.5 (111.8-117.1) | 116.4 (113.4-119.6) |
| South Asia                                 | 113.2 (111.2-115.2) | 114.2 (112.9-115.6) | 115.0 (113.8-116.2) |
| Sub-Saharan Africa                         | 114.1 (112.7-115.6) | 114.8 (113.7-116.0) | 115.1 (114.0-116.1) |
| <b>30-39 years</b>                         |                     |                     |                     |
| World                                      | 115.7 (114.9-116.6) | 115.3 (114.8-115.9) | 115.6 (115.0-116.2) |
| Central and eastern Europe                 | 120.9 (119.6-122.2) | 118.8 (117.4-120.3) | 116.9 (115.3-118.6) |
| Central Asia, Middle East and north Africa | 119.3 (117.5-121.0) | 118.2 (117.1-119.4) | 116.6 (115.5-117.7) |
| East and southeast Asia                    | 112.7 (111.6-113.9) | 113.0 (112.0-113.9) | 114.0 (112.8-115.2) |
| High-income Asia Pacific                   | 115.4 (114.1-116.7) | 112.8 (111.8-113.8) | 110.4 (109.3-111.5) |
| High-income western                        | 115.0 (114.2-115.9) | 113.3 (112.6-113.9) | 111.4 (110.6-112.3) |

| <b>Mean systolic blood pressure (mmHg)</b> |                     |                     |                     |
|--------------------------------------------|---------------------|---------------------|---------------------|
| <b>Super-region (Women)</b>                | <b>Year</b>         |                     |                     |
|                                            | <b>1985-1994</b>    | <b>1995-2004</b>    | <b>2005-2016</b>    |
| Latin America and Caribbean                | 117.7 (115.9-119.5) | 115.9 (114.8-117.0) | 115.2 (114.1-116.4) |
| Oceania                                    | 113.9 (111.4-116.4) | 115.9 (113.0-118.7) | 118.1 (114.7-121.7) |
| South Asia                                 | 116.3 (113.9-118.5) | 117.5 (116.0-118.9) | 118.3 (117.1-119.6) |
| Sub-Saharan Africa                         | 118.3 (116.7-119.9) | 119.1 (117.9-120.4) | 119.3 (118.2-120.5) |
| <b>40-49 years</b>                         |                     |                     |                     |
| World                                      | 123.1 (122.1-124.1) | 122.4 (121.7-123.0) | 122.3 (121.5-123.0) |
| Central and eastern Europe                 | 130.5 (128.9-132.1) | 127.9 (126.2-129.7) | 125.6 (123.5-127.7) |
| Central Asia, Middle East and north Africa | 127.7 (125.5-129.8) | 126.3 (125.0-127.7) | 124.4 (123.0-125.7) |
| East and southeast Asia                    | 120.0 (118.6-121.4) | 120.1 (119.0-121.3) | 121.4 (119.8-122.9) |
| High-income Asia Pacific                   | 123.8 (122.4-125.2) | 120.2 (119.0-121.4) | 116.9 (115.6-118.2) |
| High-income western                        | 122.2 (121.2-123.3) | 119.5 (118.7-120.3) | 117.5 (116.4-118.6) |
| Latin America and Caribbean                | 125.2 (123.0-127.4) | 123.0 (121.6-124.3) | 122.1 (120.7-123.5) |
| Oceania                                    | 118.4 (115.3-121.5) | 120.8 (117.5-124.2) | 123.5 (119.6-127.9) |
| South Asia                                 | 121.9 (119.0-124.7) | 123.5 (121.7-125.3) | 124.6 (123.0-126.1) |
| Sub-Saharan Africa                         | 126.0 (123.9-128.0) | 126.9 (125.4-128.5) | 127.1 (125.7-128.5) |
| <b>50-59 years</b>                         |                     |                     |                     |
| World                                      | 132.5 (131.3-133.7) | 131.2 (130.4-131.9) | 130.9 (130.0-131.7) |
| Central and eastern Europe                 | 142.5 (140.5-144.6) | 139.2 (137.1-141.3) | 136.4 (133.8-139.0) |
| Central Asia, Middle East and north Africa | 137.7 (135.0-140.4) | 136.2 (134.5-137.9) | 133.7 (132.0-135.3) |
| East and southeast Asia                    | 128.7 (126.9-130.5) | 128.9 (127.5-130.4) | 130.3 (128.4-132.2) |
| High-income Asia Pacific                   | 133.1 (131.3-134.9) | 129.0 (127.4-130.5) | 125.0 (123.3-126.6) |
| High-income western                        | 132.3 (131.1-133.6) | 128.5 (127.5-129.5) | 125.5 (124.2-126.9) |
| Latin America and Caribbean                | 134.5 (131.8-137.2) | 131.7 (130.0-133.4) | 130.7 (129.0-132.4) |
| Oceania                                    | 124.8 (120.9-128.7) | 127.8 (123.6-132.0) | 131.1 (126.2-136.3) |
| South Asia                                 | 128.9 (125.3-132.4) | 130.8 (128.6-133.1) | 132.3 (130.4-134.3) |
| Sub-Saharan Africa                         | 135.5 (133.0-138.0) | 136.6 (134.7-138.5) | 136.8 (135.1-138.5) |
| <b>60-69 years</b>                         |                     |                     |                     |
| World                                      | 140.8 (139.5-142.1) | 139.2 (138.3-140.0) | 138.1 (137.1-139.1) |
| Central and eastern Europe                 | 152.5 (150.2-155.0) | 148.9 (146.4-151.4) | 145.5 (142.7-148.4) |
| Central Asia, Middle East and north Africa | 145.9 (142.7-149.0) | 144.2 (142.3-146.2) | 141.4 (139.5-143.3) |
| East and southeast Asia                    | 135.9 (133.9-137.9) | 136.3 (134.7-137.9) | 137.8 (135.7-140.0) |
| High-income Asia Pacific                   | 140.9 (138.9-142.8) | 136.0 (134.3-137.7) | 132.1 (130.0-134.1) |
| High-income western                        | 141.0 (139.6-142.5) | 137.5 (136.5-138.6) | 133.8 (132.3-135.3) |
| Latin America and Caribbean                | 142.4 (139.3-145.4) | 139.3 (137.3-141.2) | 138.1 (136.2-140.1) |
| Oceania                                    | 130.5 (125.7-135.2) | 134.0 (128.9-139.0) | 137.7 (132.1-143.6) |
| South Asia                                 | 134.7 (130.6-138.6) | 136.9 (134.3-139.4) | 138.5 (136.3-140.7) |
| Sub-Saharan Africa                         | 143.4 (140.6-146.3) | 144.7 (142.5-146.9) | 144.9 (142.9-146.8) |
| <b>70-79 years</b>                         |                     |                     |                     |
| World                                      | 145.8 (144.5-147.2) | 144.2 (143.3-145.1) | 143.0 (141.9-144.0) |
| Central and eastern Europe                 | 158.1 (155.4-160.9) | 154.2 (151.4-157.0) | 150.9 (147.6-154.1) |
| Central Asia, Middle East and north Africa | 150.5 (147.1-153.9) | 148.7 (146.5-151.0) | 145.8 (143.7-147.9) |
| East and southeast Asia                    | 140.3 (138.3-142.5) | 140.7 (138.9-142.4) | 142.3 (140.1-144.5) |
| High-income Asia Pacific                   | 145.6 (143.6-147.7) | 140.6 (138.7-142.4) | 136.4 (134.3-138.5) |
| High-income western                        | 147.2 (145.7-148.7) | 143.8 (142.6-144.9) | 140.2 (138.6-141.8) |
| Latin America and Caribbean                | 147.5 (144.3-150.6) | 144.3 (142.1-146.3) | 143.0 (141.0-145.2) |
| Oceania                                    | 134.3 (128.3-140.2) | 137.5 (131.4-143.7) | 141.6 (135.0-148.4) |
| South Asia                                 | 138.0 (133.8-142.1) | 140.2 (137.5-142.9) | 142.0 (139.6-144.3) |



| <b>Mean systolic blood pressure (mmHg)</b> |                     |                     |                     |
|--------------------------------------------|---------------------|---------------------|---------------------|
| <b>Super-region (Women)</b>                | <b>Year</b>         |                     |                     |
|                                            | <b>1985-1994</b>    | <b>1995-2004</b>    | <b>2005-2016</b>    |
| Sub-Saharan Africa                         | 148.1 (145.1-151.2) | 149.2 (146.9-151.7) | 149.5 (147.3-151.7) |

| <b>Mean diastolic blood pressure (mmHg)</b> |                  |                  |                  |
|---------------------------------------------|------------------|------------------|------------------|
| <b>Super-region (Men)</b>                   | <b>Year</b>      |                  |                  |
|                                             | <b>1985-1994</b> | <b>1995-2004</b> | <b>2005-2016</b> |
| <b>20-29 years</b>                          |                  |                  |                  |
| World                                       | 74.5 (73.8-75.1) | 74.7 (74.3-75.1) | 74.8 (74.4-75.3) |
| Central and eastern Europe                  | 79.0 (78.0-80.0) | 78.2 (77.2-79.2) | 77.8 (76.6-79.1) |
| Central Asia, Middle East and north Africa  | 74.4 (73.1-75.6) | 74.5 (73.7-75.3) | 74.7 (73.9-75.6) |
| East and southeast Asia                     | 73.3 (72.5-74.2) | 74.2 (73.5-74.9) | 74.5 (73.6-75.4) |
| High-income Asia Pacific                    | 74.0 (73.0-75.0) | 73.4 (72.6-74.1) | 73.1 (72.3-73.9) |
| High-income western                         | 73.9 (73.3-74.5) | 72.5 (72.0-73.1) | 71.4 (70.7-72.0) |
| Latin America and Caribbean                 | 75.4 (74.1-76.7) | 75.2 (74.3-76.0) | 74.3 (73.5-75.2) |
| Oceania                                     | 70.4 (68.3-72.4) | 70.7 (68.4-73.0) | 71.3 (68.7-73.9) |
| South Asia                                  | 75.8 (74.1-77.6) | 76.1 (74.9-77.2) | 77.0 (76.0-77.9) |
| Sub-Saharan Africa                          | 72.9 (71.7-74.1) | 73.3 (72.3-74.2) | 73.5 (72.6-74.4) |
| <b>30-39 years</b>                          |                  |                  |                  |
| World                                       | 78.1 (77.5-78.7) | 78.1 (77.7-78.5) | 78.3 (77.8-78.7) |
| Central and eastern Europe                  | 83.1 (82.1-84.1) | 82.3 (81.3-83.4) | 81.9 (80.7-83.1) |
| Central Asia, Middle East and north Africa  | 77.9 (76.6-79.1) | 78.0 (77.2-78.8) | 78.1 (77.3-78.9) |
| East and southeast Asia                     | 76.4 (75.5-77.2) | 77.4 (76.6-78.1) | 77.6 (76.7-78.5) |
| High-income Asia Pacific                    | 78.5 (77.5-79.4) | 78.0 (77.2-78.8) | 77.6 (76.7-78.4) |
| High-income western                         | 78.5 (77.9-79.2) | 77.3 (76.8-77.8) | 76.2 (75.5-76.9) |
| Latin America and Caribbean                 | 79.4 (78.0-80.7) | 79.1 (78.2-80.0) | 78.3 (77.4-79.1) |
| Oceania                                     | 73.3 (71.3-75.3) | 73.6 (71.5-75.7) | 74.1 (71.5-76.6) |
| South Asia                                  | 78.5 (76.7-80.2) | 78.7 (77.5-79.8) | 79.6 (78.6-80.6) |
| Sub-Saharan Africa                          | 77.3 (76.2-78.5) | 77.7 (76.8-78.7) | 78.0 (77.1-78.9) |
| <b>40-49 years</b>                          |                  |                  |                  |
| World                                       | 80.9 (80.3-81.6) | 80.9 (80.5-81.3) | 80.9 (80.4-81.4) |
| Central and eastern Europe                  | 86.4 (85.4-87.4) | 85.6 (84.5-86.6) | 85.1 (83.9-86.4) |
| Central Asia, Middle East and north Africa  | 80.7 (79.4-82.0) | 80.9 (80.1-81.7) | 81.0 (80.2-81.8) |
| East and southeast Asia                     | 79.1 (78.3-80.0) | 80.1 (79.4-80.9) | 80.4 (79.4-81.4) |
| High-income Asia Pacific                    | 81.8 (80.9-82.7) | 81.2 (80.3-82.0) | 80.7 (79.9-81.6) |
| High-income western                         | 81.9 (81.2-82.5) | 80.2 (79.7-80.8) | 79.3 (78.5-80.0) |
| Latin America and Caribbean                 | 82.4 (81.0-83.8) | 82.1 (81.2-83.1) | 81.2 (80.3-82.2) |
| Oceania                                     | 75.4 (73.3-77.5) | 75.8 (73.7-78.0) | 76.4 (73.9-78.8) |
| South Asia                                  | 80.4 (78.5-82.2) | 80.6 (79.4-81.8) | 81.6 (80.5-82.6) |
| Sub-Saharan Africa                          | 80.7 (79.4-82.0) | 81.1 (80.2-82.1) | 81.3 (80.4-82.3) |
| <b>50-59 years</b>                          |                  |                  |                  |
| World                                       | 82.8 (82.2-83.5) | 82.6 (82.2-83.1) | 82.6 (82.1-83.1) |
| Central and eastern Europe                  | 88.5 (87.4-89.6) | 87.6 (86.5-88.7) | 87.2 (85.8-88.5) |
| Central Asia, Middle East and north Africa  | 82.8 (81.4-84.2) | 82.9 (82.0-83.7) | 83.0 (82.1-83.8) |
| East and southeast Asia                     | 81.1 (80.1-82.0) | 82.1 (81.3-82.9) | 82.4 (81.4-83.5) |
| High-income Asia Pacific                    | 83.7 (82.7-84.6) | 83.0 (82.1-83.8) | 82.4 (81.5-83.3) |
| High-income western                         | 83.6 (82.9-84.3) | 81.8 (81.2-82.3) | 80.3 (79.6-81.1) |
| Latin America and Caribbean                 | 84.2 (82.7-85.7) | 83.9 (82.9-84.9) | 83.0 (82.0-84.0) |

| <b>Mean diastolic blood pressure (mmHg)</b> |                  |                  |                  |
|---------------------------------------------|------------------|------------------|------------------|
| <b>Super-region (Men)</b>                   | <b>Year</b>      |                  |                  |
|                                             | <b>1985-1994</b> | <b>1995-2004</b> | <b>2005-2016</b> |
| Oceania                                     | 76.5 (74.2-78.7) | 76.9 (74.6-79.2) | 77.6 (75.0-80.1) |
| South Asia                                  | 81.4 (79.5-83.4) | 81.7 (80.4-82.9) | 82.7 (81.6-83.8) |
| Sub-Saharan Africa                          | 82.7 (81.4-84.0) | 83.2 (82.1-84.2) | 83.4 (82.4-84.4) |
| <b>60-69 years</b>                          |                  |                  |                  |
| World                                       | 82.5 (81.9-83.2) | 82.5 (82.0-82.9) | 82.2 (81.7-82.7) |
| Central and eastern Europe                  | 88.5 (87.3-89.7) | 87.6 (86.4-88.8) | 87.0 (85.6-88.4) |
| Central Asia, Middle East and north Africa  | 83.0 (81.5-84.5) | 83.2 (82.3-84.1) | 83.1 (82.2-84.1) |
| East and southeast Asia                     | 81.2 (80.2-82.2) | 82.3 (81.5-83.2) | 82.7 (81.5-83.8) |
| High-income Asia Pacific                    | 83.1 (82.1-84.1) | 82.2 (81.3-83.1) | 82.0 (80.9-83.0) |
| High-income western                         | 82.3 (81.6-83.0) | 80.9 (80.3-81.5) | 79.2 (78.4-80.0) |
| Latin America and Caribbean                 | 83.8 (82.2-85.4) | 83.4 (82.4-84.4) | 82.5 (81.4-83.5) |
| Oceania                                     | 75.6 (73.0-78.3) | 76.0 (73.3-78.6) | 76.7 (73.9-79.6) |
| South Asia                                  | 80.9 (78.9-83.0) | 81.2 (79.9-82.5) | 82.3 (81.1-83.4) |
| Sub-Saharan Africa                          | 82.4 (80.9-83.8) | 82.9 (81.7-84.0) | 83.2 (82.1-84.3) |
| <b>70-79 years</b>                          |                  |                  |                  |
| World                                       | 80.2 (79.5-80.9) | 80.2 (79.7-80.7) | 80.1 (79.6-80.7) |
| Central and eastern Europe                  | 86.7 (85.3-88.2) | 85.8 (84.3-87.3) | 85.3 (83.6-87.0) |
| Central Asia, Middle East and north Africa  | 81.7 (80.0-83.4) | 81.9 (80.8-83.0) | 81.9 (80.8-83.0) |
| East and southeast Asia                     | 79.5 (78.4-80.6) | 80.8 (79.8-81.7) | 81.1 (79.9-82.4) |
| High-income Asia Pacific                    | 80.5 (79.3-81.6) | 79.6 (78.6-80.6) | 79.3 (78.1-80.5) |
| High-income western                         | 78.8 (78.0-79.7) | 77.5 (76.8-78.1) | 76.1 (75.2-76.9) |
| Latin America and Caribbean                 | 81.4 (79.7-83.2) | 81.1 (79.9-82.2) | 80.0 (78.9-81.2) |
| Oceania                                     | 73.1 (69.8-76.5) | 73.4 (70.0-76.8) | 74.2 (70.5-77.8) |
| South Asia                                  | 79.5 (77.2-81.7) | 79.8 (78.3-81.2) | 80.9 (79.6-82.2) |
| Sub-Saharan Africa                          | 80.2 (78.4-81.8) | 80.7 (79.4-82.1) | 81.1 (79.8-82.4) |

| <b>Mean diastolic blood pressure (mmHg)</b> |                  |                  |                  |
|---------------------------------------------|------------------|------------------|------------------|
| <b>Super-region (Women)</b>                 | <b>Year</b>      |                  |                  |
|                                             | <b>1985-1994</b> | <b>1995-2004</b> | <b>2005-2016</b> |
| <b>20-29 years</b>                          |                  |                  |                  |
| World                                       | 71.7 (71.1-72.2) | 71.8 (71.4-72.2) | 72.1 (71.7-72.5) |
| Central and eastern Europe                  | 75.0 (74.1-75.9) | 73.6 (72.7-74.6) | 72.9 (71.8-74.1) |
| Central Asia, Middle East and north Africa  | 72.4 (71.1-73.7) | 72.5 (71.7-73.3) | 72.1 (71.3-72.9) |
| East and southeast Asia                     | 70.3 (69.5-71.1) | 70.8 (70.1-71.5) | 71.1 (70.3-71.9) |
| High-income Asia Pacific                    | 68.4 (67.5-69.3) | 67.2 (66.5-67.9) | 66.5 (65.7-67.2) |
| High-income western                         | 70.5 (69.9-71.1) | 68.9 (68.4-69.4) | 67.9 (67.3-68.6) |
| Latin America and Caribbean                 | 72.5 (71.3-73.8) | 71.9 (71.1-72.6) | 70.8 (70.0-71.5) |
| Oceania                                     | 69.2 (67.3-71.0) | 70.4 (68.3-72.5) | 71.7 (69.4-74.2) |
| South Asia                                  | 73.5 (72.0-75.0) | 74.0 (73.0-75.0) | 74.8 (73.9-75.6) |
| Sub-Saharan Africa                          | 71.9 (70.8-73.0) | 72.8 (71.9-73.7) | 73.5 (72.7-74.4) |
| <b>30-39 years</b>                          |                  |                  |                  |
| World                                       | 75.0 (74.4-75.6) | 74.9 (74.5-75.3) | 75.1 (74.7-75.5) |
| Central and eastern Europe                  | 79.2 (78.3-80.2) | 77.7 (76.7-78.8) | 76.9 (75.7-78.1) |
| Central Asia, Middle East and north Africa  | 76.0 (74.7-77.4) | 76.1 (75.3-76.9) | 75.6 (74.8-76.4) |
| East and southeast Asia                     | 73.4 (72.5-74.2) | 73.9 (73.2-74.6) | 74.3 (73.4-75.2) |
| High-income Asia Pacific                    | 72.4 (71.5-73.3) | 71.2 (70.4-72.0) | 70.4 (69.5-71.2) |

| <b>Mean diastolic blood pressure (mmHg)</b> |                  |                  |                  |
|---------------------------------------------|------------------|------------------|------------------|
| <b>Super-region (Women)</b>                 | <b>Year</b>      |                  |                  |
|                                             | <b>1985-1994</b> | <b>1995-2004</b> | <b>2005-2016</b> |
| High-income western                         | 74.2 (73.5-74.8) | 72.5 (72.0-73.0) | 71.5 (70.8-72.1) |
| Latin America and Caribbean                 | 76.2 (74.9-77.6) | 75.4 (74.6-76.3) | 74.3 (73.4-75.1) |
| Oceania                                     | 70.9 (69.1-72.8) | 72.2 (70.1-74.2) | 73.6 (71.1-76.2) |
| South Asia                                  | 76.1 (74.4-77.8) | 76.6 (75.5-77.8) | 77.5 (76.5-78.4) |
| Sub-Saharan Africa                          | 75.5 (74.3-76.7) | 76.6 (75.6-77.5) | 77.3 (76.4-78.1) |
| <b>40-49 years</b>                          |                  |                  |                  |
| World                                       | 78.8 (78.1-79.5) | 78.6 (78.2-79.1) | 78.6 (78.1-79.1) |
| Central and eastern Europe                  | 84.2 (83.2-85.3) | 82.6 (81.4-83.8) | 81.7 (80.3-83.1) |
| Central Asia, Middle East and north Africa  | 80.2 (78.7-81.7) | 80.3 (79.4-81.2) | 79.7 (78.9-80.6) |
| East and southeast Asia                     | 77.2 (76.2-78.1) | 77.7 (76.9-78.4) | 78.0 (77.0-79.1) |
| High-income Asia Pacific                    | 77.0 (76.0-77.9) | 75.6 (74.7-76.4) | 74.6 (73.7-75.5) |
| High-income western                         | 78.2 (77.4-78.9) | 76.0 (75.4-76.6) | 75.0 (74.3-75.8) |
| Latin America and Caribbean                 | 80.2 (78.7-81.7) | 79.3 (78.4-80.3) | 78.0 (77.1-79.0) |
| Oceania                                     | 73.2 (71.0-75.3) | 74.5 (72.3-76.8) | 76.2 (73.5-78.9) |
| South Asia                                  | 79.0 (77.1-80.9) | 79.6 (78.3-80.8) | 80.5 (79.4-81.6) |
| Sub-Saharan Africa                          | 79.5 (78.1-80.8) | 80.7 (79.6-81.7) | 81.4 (80.5-82.4) |
| <b>50-59 years</b>                          |                  |                  |                  |
| World                                       | 81.8 (81.1-82.5) | 81.2 (80.7-81.7) | 81.1 (80.6-81.7) |
| Central and eastern Europe                  | 88.4 (87.1-89.6) | 86.4 (85.1-87.6) | 85.4 (83.9-86.9) |
| Central Asia, Middle East and north Africa  | 83.3 (81.6-85.0) | 83.5 (82.5-84.5) | 82.8 (81.8-83.8) |
| East and southeast Asia                     | 79.9 (78.9-81.0) | 80.6 (79.7-81.4) | 80.9 (79.8-82.0) |
| High-income Asia Pacific                    | 80.3 (79.2-81.4) | 78.7 (77.8-79.6) | 77.7 (76.7-78.7) |
| High-income western                         | 81.1 (80.3-81.9) | 78.5 (77.9-79.1) | 77.1 (76.2-77.9) |
| Latin America and Caribbean                 | 83.0 (81.3-84.6) | 82.0 (81.0-83.0) | 80.6 (79.5-81.6) |
| Oceania                                     | 74.5 (72.0-77.0) | 75.9 (73.4-78.6) | 77.8 (74.9-80.8) |
| South Asia                                  | 80.9 (78.8-83.0) | 81.5 (80.1-82.9) | 82.5 (81.4-83.7) |
| Sub-Saharan Africa                          | 82.2 (80.6-83.7) | 83.4 (82.3-84.6) | 84.4 (83.3-85.4) |
| <b>60-69 years</b>                          |                  |                  |                  |
| World                                       | 82.6 (81.8-83.3) | 81.9 (81.4-82.5) | 81.4 (80.8-82.0) |
| Central and eastern Europe                  | 90.0 (88.6-91.4) | 87.9 (86.5-89.4) | 86.7 (85.1-88.3) |
| Central Asia, Middle East and north Africa  | 84.2 (82.3-86.1) | 84.4 (83.3-85.5) | 83.7 (82.7-84.8) |
| East and southeast Asia                     | 80.6 (79.4-81.8) | 81.3 (80.3-82.2) | 81.7 (80.4-82.9) |
| High-income Asia Pacific                    | 81.1 (80.0-82.2) | 79.3 (78.4-80.3) | 78.4 (77.2-79.6) |
| High-income western                         | 81.3 (80.4-82.1) | 79.0 (78.3-79.7) | 77.1 (76.2-77.9) |
| Latin America and Caribbean                 | 83.4 (81.6-85.2) | 82.3 (81.2-83.4) | 80.8 (79.6-81.9) |
| Oceania                                     | 73.7 (70.8-76.6) | 75.3 (72.3-78.2) | 77.2 (74.0-80.6) |
| South Asia                                  | 81.0 (78.7-83.3) | 81.7 (80.2-83.2) | 82.8 (81.5-84.1) |
| Sub-Saharan Africa                          | 82.5 (80.8-84.2) | 83.9 (82.6-85.1) | 84.9 (83.7-86.0) |
| <b>70-79 years</b>                          |                  |                  |                  |
| World                                       | 81.2 (80.4-82.0) | 80.6 (80.0-81.1) | 80.2 (79.6-80.8) |
| Central and eastern Europe                  | 89.6 (87.9-91.3) | 87.3 (85.6-88.9) | 86.1 (84.2-87.9) |
| Central Asia, Middle East and north Africa  | 83.4 (81.3-85.4) | 83.6 (82.3-84.9) | 82.9 (81.7-84.2) |
| East and southeast Asia                     | 79.6 (78.3-80.9) | 80.3 (79.2-81.3) | 80.7 (79.3-82.0) |
| High-income Asia Pacific                    | 79.7 (78.5-80.9) | 77.8 (76.7-78.8) | 76.8 (75.5-78.1) |
| High-income western                         | 79.3 (78.4-80.2) | 77.1 (76.4-77.8) | 75.5 (74.6-76.5) |
| Latin America and Caribbean                 | 82.0 (80.0-83.9) | 80.9 (79.6-82.1) | 79.2 (77.9-80.4) |
| Oceania                                     | 71.2 (67.5-74.8) | 72.8 (69.1-76.5) | 75.0 (71.1-79.0) |

| <b>Mean diastolic blood pressure (mmHg)</b> |                  |                  |                  |
|---------------------------------------------|------------------|------------------|------------------|
| <b>Super-region (Women)</b>                 | <b>Year</b>      |                  |                  |
|                                             | <b>1985-1994</b> | <b>1995-2004</b> | <b>2005-2016</b> |
| South Asia                                  | 80.1 (77.6-82.6) | 80.8 (79.3-82.5) | 82.0 (80.6-83.5) |
| Sub-Saharan Africa                          | 81.0 (79.2-82.9) | 82.4 (80.9-83.8) | 83.5 (82.2-84.9) |

**Supplementary Table 3.** Number of studies and data points used in the analysis, by region.

| Region                                     | All post-1985 studies |                 | Studies with complete metrics † |                 | Studies with standard age groups ‡ |                 | Studies with sample size ≥25 |                 |
|--------------------------------------------|-----------------------|-----------------|---------------------------------|-----------------|------------------------------------|-----------------|------------------------------|-----------------|
|                                            | No. studies           | No. data points | No. studies                     | No. data points | No. studies                        | No. data points | No. studies                  | No. data points |
| Central and eastern Europe                 | 138                   | 1,370           | 124                             | 1,264           | 106                                | 801             | 106                          | 757             |
| Central Asia, Middle East and north Africa | 141                   | 1,610           | 115                             | 1,358           | 107                                | 983             | 107                          | 940             |
| East and southeast Asia                    | 153                   | 1,541           | 125                             | 1,236           | 108                                | 851             | 108                          | 834             |
| High-income Asia Pacific                   | 113                   | 1,235           | 103                             | 1,143           | 85                                 | 896             | 78                           | 773             |
| High-income western                        | 571                   | 5,114           | 495                             | 4,602           | 386                                | 2,746           | 385                          | 2,677           |
| Latin America and the Caribbean            | 123                   | 1,303           | 91                              | 984             | 79                                 | 730             | 79                           | 671             |
| Oceania                                    | 42                    | 432             | 35                              | 395             | 35                                 | 276             | 34                           | 246             |
| South Asia                                 | 60                    | 716             | 49                              | 596             | 38                                 | 380             | 38                           | 367             |
| Sub-Saharan Africa                         | 120                   | 1,235           | 87                              | 980             | 84                                 | 674             | 83                           | 645             |
| <b>Total</b>                               | <b>1,461</b>          | <b>14,556</b>   | <b>1,224</b>                    | <b>12,558</b>   | <b>1,028</b>                       | <b>8,337</b>    | <b>1,018</b>                 | <b>7,910</b>    |

† Including prevalence of raised blood pressure, mean systolic blood pressure and mean diastolic blood pressure.

‡ Ten-year age groups from 20-29 years to 70-79 years.

**Supplementary Table 4.** List of data sources used in the analysis and their characteristics.

|    | Country        | Data years | Survey/Study name/Citation                                                                                                     | Level of representativeness | Rural, urban or both | Age range as in the NCD-RisC database |        | Sample size |        | Note |
|----|----------------|------------|--------------------------------------------------------------------------------------------------------------------------------|-----------------------------|----------------------|---------------------------------------|--------|-------------|--------|------|
|    |                |            |                                                                                                                                |                             |                      | Male                                  | Female | Male        | Female |      |
| 1  | Albania        | 2008-2009  | Demographic and Health Survey Albania 2008-2009                                                                                | National                    | both                 | 15-49                                 | 15-49  | 2,875       | 3,555  |      |
| 2  | Algeria        | 2003       | STEPS                                                                                                                          | Community                   | both                 | 25-64                                 | 25-64  | 1,612       | 2,450  |      |
| 3  | Algeria        | 2007-2009  | The ISOR (InSulino-resistance in ORan) study                                                                                   | Community                   | urban                | 30-64                                 | 30-64  | 377         | 405    |      |
| 4  | American Samoa | 1994       | McGarvey ST. Cardiovascular disease (CVD) risk factors in Samoa and American Samoa, 1990-95. Pac Health Dialog 2001; 8: 157-62 | National                    | both                 | 25+                                   | 25+    | 168         | 242    |      |
| 5  | American Samoa | 2004       | STEPS                                                                                                                          | National                    | both                 | 25-64                                 | 25-64  | 950         | 1,062  |      |
| 6  | Argentina      | 1985-1986  | INTERSALT                                                                                                                      | Community                   | urban                | 20-59                                 | 20-59  | 100         | 100    |      |
| 7  | Argentina      | 2005       | Encuesta Nacional de Nutricion y Salud 2005                                                                                    | National                    | both                 |                                       | 10-49  |             | 5,469  |      |
| 8  | Argentina      | 2008-2011  | The VELA Project                                                                                                               | Community                   | rural                | 10+                                   | 10+    | 305         | 470    |      |
| 9  | Argentina      | 2011-2012  | Detection and follow-up of cardiovascular disease and risk factors in the Southern Cone of Latin America. The CESCAS I Study   | Community                   | urban                | 35-74                                 | 35-74  | 1,589       | 2,397  |      |
| 10 | Armenia        | 2005       | Demographic and Health Survey Armenia 2005                                                                                     | National                    | both                 | 15-49                                 | 15-49  | 1,208       | 6,188  |      |
| 11 | Armenia        | 2016       | STEPS                                                                                                                          | National                    | both                 | 18-69                                 | 18-69  | 601         | 1,459  |      |
| 12 | Australia      | 1988-1989  | Dubbo Study of Australian Elderly                                                                                              | Community                   | urban                | 59+                                   | 59+    | 878         | 1,222  |      |
| 13 | Australia      | 1988-1989  | MONICA, Perth inner                                                                                                            | Community                   | urban                | 25-64                                 | 25-64  | 404         | 405    |      |
| 14 | Australia      | 1988-1989  | MONICA, Perth outer                                                                                                            | Community                   | urban                | 25-64                                 | 25-64  | 412         | 419    |      |
| 15 | Australia      | 1988-1989  | MONICA, Newcastle                                                                                                              | Subnational                 | urban                | 35-64                                 | 35-64  | 672         | 661    |      |
| 16 | Australia      | 1989       | Risk Factor Prevalence Study                                                                                                   | National                    | urban                | 20-69                                 | 20-69  | 4,551       | 4,727  |      |
| 17 | Australia      | 1990-1991  | Canberra-Queanbeyan Longitudinal Study of the Elderly                                                                          | Community                   | urban                | 70+                                   | 70+    | 454         | 380    |      |
| 18 | Australia      | 1992-1993  | Australia Longitudinal Study of Ageing                                                                                         | Community                   | urban                | 65+                                   | 65+    | 842         | 771    |      |
| 19 | Australia      | 1994       | MONICA, Perth outer                                                                                                            | Community                   | urban                | 25-64                                 | 25-64  | 375         | 387    |      |
| 20 | Australia      | 1994       | MONICA, Newcastle                                                                                                              | Subnational                 | urban                | 35-64                                 | 35-64  | 637         | 688    |      |
| 21 | Australia      | 1994       | MONICA, Perth inner                                                                                                            | Community                   | urban                | 25-64                                 | 25-64  | 363         | 350    |      |
| 22 | Australia      | 1995-1996  | National Nutrition Study                                                                                                       | National                    | both                 | 16+                                   | 16+    | 5,227       | 5,700  |      |
| 23 | Australia      | 1996-1998  | Western Australian AAA Screening Program                                                                                       | Community                   | urban                | 65-84                                 | 65-84  | 12,202      |        |      |
| 24 | Australia      | 1999-2000  | The Australian Diabetes, Obesity and Lifestyle Study 1999-2000                                                                 | National                    | both                 | 25+                                   | 25+    | 5,023       | 6,113  |      |
| 25 | Australia      | 1999-2003  | North West Adelaide Health Study                                                                                               | Community                   | urban                | 18+                                   | 18+    | 1,932       | 2,123  |      |
| 26 | Australia      | 2004-2005  | The Australian Diabetes, Obesity and Lifestyle Study 2004-2005                                                                 | National                    | both                 | 30+                                   | 30+    | 2,885       | 3,478  |      |
| 27 | Australia      | 2004-2006  | North West Adelaide Health Study                                                                                               | Community                   | urban                | 20+                                   | 20+    | 1,515       | 1,669  |      |
| 28 | Australia      | 2008-2010  | North West Adelaide Health Study                                                                                               | Community                   | urban                | 24+                                   | 24+    | 1,169       | 1,317  |      |
| 29 | Australia      | 2011-2012  | Australian Health Survey                                                                                                       | National                    | both                 | 10+                                   | 10+    | 11,290      | 12,309 |      |
| 30 | Australia      | 2012       | The Australian Diabetes, Obesity and Lifestyle Study 2012                                                                      | National                    | both                 | 37+                                   | 37+    | 2,052       | 2,536  |      |
| 31 | Australia      | 2014-2015  | National Health Survey                                                                                                         | National                    | both                 | 18+                                   | 18+    | 5,158       | 5,865  |      |
| 32 | Austria        | 1992       | Vorarlberg Health Monitoring and Promotion Programme                                                                           | Subnational                 | both                 | 18+                                   | 18+    | 14,161      | 18,825 |      |
| 33 | Austria        | 1998       | Vorarlberg Health Monitoring and Promotion Programme                                                                           | Subnational                 | both                 | 18+                                   | 18+    | 16,154      | 20,917 |      |
| 34 | Austria        | 2004       | Vorarlberg Health Monitoring and Promotion Programme                                                                           | Subnational                 | both                 | 18+                                   | 18+    | 20,157      | 23,891 |      |
| 35 | Azerbaijan     | 2006       | Demographic and Health Survey Azerbaijan 2006                                                                                  | National                    | both                 | 15-59                                 | 15-49  | 2,551       | 8,114  |      |
| 36 | Bangladesh     | 2011       | Demographic and Health Survey Bangladesh 2011                                                                                  | National                    | both                 | 16+                                   | 12+    | 3,905       | 3,951  |      |
| 37 | Bangladesh     | 2015       | An assessment of BRAC Health Nutrition and Population Programme and benchmark survey of Sustainable Development Goal – 2015    | National                    | rural                | 35+                                   | 35+    | 5,234       | 6,568  |      |
| 38 | Barbados       | 2011-2013  | Health of the Nation (HotN)                                                                                                    | National                    | both                 | 25+                                   | 25+    | 470         | 739    |      |
| 39 | Belarus        | 2016       | STEPS                                                                                                                          | National                    | both                 | 18-69                                 | 18-69  | 2,086       | 2,896  |      |
| 40 | Belgium        | 1984-1985  | Belgian Interuniversity Research on Nutrition and Health                                                                       | National                    | both                 | 25-74                                 | 25-74  | 5,899       | 5,287  |      |
| 41 | Belgium        | 1985-1986  | INTERSALT, Ghent                                                                                                               | Community                   | urban                | 20-59                                 | 20-59  | 100         | 100    |      |
| 42 | Belgium        | 1985-1987  | INTERSALT, Charleroi                                                                                                           | Community                   | urban                | 20-59                                 | 20-59  | 82          | 75     |      |
| 43 | Belgium        | 1985-1987  | MONICA, Charleroi                                                                                                              | Community                   | urban                | 25-64                                 | 25-64  | 346         | 326    |      |
| 44 | Belgium        | 1985-1987  | MONICA, Ghent                                                                                                                  | Community                   | urban                | 25-64                                 | 25-64  | 550         | 459    |      |
| 45 | Belgium        | 1985-1990  | Flemish Study on Environment, Genes and Health Outcomes                                                                        | Community                   | rural                | 20-90                                 | 20-90  | 659         | 696    |      |
| 46 | Belgium        | 1987-1990  | MONICA, Charleroi                                                                                                              | Community                   | urban                | 25-64                                 | 25-64  | 325         | 301    |      |
| 47 | Belgium        | 1988-1990  | MONICA, Ghent                                                                                                                  | Community                   | urban                | 25-64                                 | 25-64  | 456         | 449    |      |
| 48 | Belgium        | 1990-1992  | MONICA, Ghent                                                                                                                  | Community                   | urban                | 25-64                                 | 25-64  | 509         | 475    |      |

|    | Country                | Data years | Survey/Study name/Citation                                     | Level of representativeness | Rural, urban or both | Age range as in the NCD-RisC database |        | Sample size |        | Note |
|----|------------------------|------------|----------------------------------------------------------------|-----------------------------|----------------------|---------------------------------------|--------|-------------|--------|------|
|    |                        |            |                                                                |                             |                      | Male                                  | Female | Male        | Female |      |
| 49 | Belgium                | 1990-1993  | MONICA, Charleroi                                              | Community                   | urban                | 25-64                                 | 25-64  | 337         | 332    |      |
| 50 | Belgium                | 1991-1994  | Flemish Study on Environment, Genes and Health Outcomes        | Community                   | rural                | 26-88                                 | 26-88  | 394         | 416    |      |
| 51 | Belgium                | 1992-1995  | Flemish Study on Environment, Genes and Health Outcomes        | Community                   | rural                | 27-89                                 | 27-89  | 298         | 312    |      |
| 52 | Belgium                | 1996-1998  | Flemish Study on Environment, Genes and Health Outcomes        | Community                   | rural                | 10-84                                 | 10-84  | 404         | 402    |      |
| 53 | Belgium                | 1998       | Flemish Study on Environment, Genes and Health Outcomes        | Community                   | rural                | 32-86                                 | 32-86  | 320         | 359    |      |
| 54 | Belgium                | 1998-2000  | Flemish Study on Environment, Genes and Health Outcomes        | Community                   | rural                | 10-80                                 | 10-80  | 222         | 219    |      |
| 55 | Belgium                | 1999-2001  | Flemish Study on Environment, Genes and Health Outcomes        | Community                   | rural                | 10-81                                 | 10-81  | 234         | 255    |      |
| 56 | Belgium                | 2001       | Flemish Study on Environment, Genes and Health Outcomes        | Community                   | rural                | 10-78                                 | 10-78  | 243         | 222    |      |
| 57 | Belgium                | 2002-2003  | Flemish Study on Environment, Genes and Health Outcomes        | Community                   | rural                | 10-81                                 | 10-81  | 180         | 200    |      |
| 58 | Belgium                | 2003       | The European Male Ageing Study                                 | Community                   | both                 | 40+                                   |        | 448         |        |      |
| 59 | Belgium                | 2002-2005  | Flemish Study on Environment, Genes and Health Outcomes        | Community                   | rural                | 10-88                                 | 10-88  | 447         | 462    |      |
| 60 | Belgium                | 2005-2008  | Flemish Study on Environment, Genes and Health Outcomes        | Community                   | rural                | 10-89                                 | 10-89  | 464         | 473    |      |
| 61 | Belgium                | 2008       | The European Male Ageing Study                                 | Community                   | both                 | 40+                                   |        | 385         |        |      |
| 62 | Belgium                | 2009-2013  | Flemish Study on Environment, Genes and Health Outcomes        | Community                   | rural                | 20-88                                 | 20-88  | 330         | 335    |      |
| 63 | Belgium                | 2010-2015  | Flemish Study on Environment, Genes and Health Outcomes        | Community                   | rural                | 15-87                                 | 15-87  | 391         | 411    |      |
| 64 | Belize                 | 2004-2005  | CAMDI                                                          | National                    | both                 | 20+                                   | 20+    | 999         | 1,434  |      |
| 65 | Benin                  | 2007       | STEPS                                                          | Community                   | urban                | 25-64                                 | 25-64  | 954         | 1,468  |      |
| 66 | Benin                  | 2008       | STEPS                                                          | National                    | both                 | 25-64                                 | 25-64  | 3,445       | 3,383  |      |
| 67 | Benin                  | 2011-2012  | Demographic and Health Survey Benin 2011-2012                  | National                    | both                 | 30-64                                 | 15-49  | 2,681       | 4,763  |      |
| 68 | Benin                  | 2015       | STEPS                                                          | National                    | both                 | 18-69                                 | 18-69  | 2,310       | 2,545  |      |
| 69 | Bhutan                 | 2007       | STEPS                                                          | Community                   | urban                | 25-74                                 | 25-74  | 1,131       | 1,328  |      |
| 70 | Bhutan                 | 2014       | STEPS                                                          | National                    | both                 | 18-69                                 | 18-69  | 1,071       | 1,680  |      |
| 71 | Bosnia and Herzegovina | 2002       | Non-communicable disease risk factor survey, Federation of B&H | Subnational                 | both                 | 25-64                                 | 25-64  | 1,118       | 1,621  |      |
| 72 | Bosnia and Herzegovina | 2012       | Non-communicable disease risk factor survey, Federation of B&H | Subnational                 | rural                | 18+                                   | 18+    | 1,177       | 1,287  |      |
| 73 | Bosnia and Herzegovina | 2012       | Non-communicable disease risk factor survey, Federation of B&H | Subnational                 | urban                | 18+                                   | 18+    | 589         | 706    |      |
| 74 | Botswana               | 2007       | STEPS                                                          | National                    | both                 | 25-64                                 | 25-64  | 1,266       | 2,600  |      |
| 75 | Botswana               | 2014       | STEPS                                                          | National                    | both                 | 15-69                                 | 15-69  | 1,299       | 2,618  |      |
| 76 | Brazil                 | 1995-1996  | Cohort study from Porto Alegre                                 | Community                   | urban                | 18+                                   | 18+    | 490         | 596    |      |
| 77 | Brazil                 | 1996-1997  | The Bambui Cohort Study of Ageing                              | Community                   | urban                | 18+                                   | 18+    | 947         | 1,367  |      |
| 78 | Brazil                 | 1999-2000  | Pelotas cross-sectional survey                                 | Community                   | urban                | 20-69                                 | 20-69  | 844         | 1,116  |      |
| 79 | Brazil                 | 2003-2005  | São Paulo Ageing & Health Study                                | Community                   | urban                | 65+                                   | 65+    | 781         | 1,200  |      |
| 80 | Brazil                 | 2004-2006  | Hearts of Brazil                                               | National                    | urban                | 18+                                   | 18+    | 574         | 654    |      |
| 81 | Brazil                 | 2006-2007  | SOFT study                                                     | Community                   | urban                | 18+                                   | 18+    | 739         | 1,110  |      |
| 82 | Brazil                 | 2009-2010  | EpiFloripa Cohort Study of Ageing - Wave 1                     | Community                   | urban                | 60+                                   | 60+    | 610         | 1,069  |      |
| 83 | Brazil                 | 2010-2013  | Baependi Heart Study                                           | Community                   | urban                | 18+                                   | 18+    | 609         | 885    |      |
| 84 | Brazil                 | 2012-2013  | Prevalence of Leptin Polymorphism Gln223Arg                    | Community                   | urban                | 18+                                   | 18+    | 282         | 526    |      |
| 85 | Brazil                 | 2013       | Pesquisas Nacional de Saude                                    | National                    | both                 | 35+                                   | 35+    | 15,948      | 21,014 |      |
| 86 | Brazil                 | 2013-2014  | EpiFloripa Cohort Study of Ageing - Wave 2                     | Community                   | urban                | 63+                                   | 63+    | 414         | 766    |      |
| 87 | Brunei Darussalam      | 2010-2011  | National Health And Nutritional Status Survey (NHANSS)         | National                    | both                 | 10-75                                 | 10-75  | 898         | 1,018  |      |
| 88 | Brunei Darussalam      | 2015-2016  | National Non-Communicable Diseases Survey (NNCDS)              | National                    | both                 | 18-69                                 | 18-69  | 903         | 1,159  |      |
| 89 | Burkina Faso           | 2013       | STEPS                                                          | National                    | both                 | 25-64                                 | 25-64  | 2,231       | 2,255  |      |
| 90 | Cabo Verde             | 2007       | STEPS                                                          | National                    | both                 | 25-64                                 | 25-64  | 663         | 1,076  |      |
| 91 | Cambodia               | 2010       | STEPS                                                          | National                    | both                 | 25-64                                 | 25-64  | 1,884       | 3,346  |      |
| 92 | Cameroon               | 1998-1999  | ENHIP                                                          | Community                   | rural                | 15+                                   | 15+    | 503         | 722    |      |
| 93 | Cameroon               | 1998-1999  | ENHIP                                                          | Community                   | urban                | 15+                                   | 15+    | 509         | 626    |      |
| 94 | Cameroon               | 2003       | STEPS                                                          | Subnational                 | urban                | 15+                                   | 15+    | 3,723       | 5,550  |      |
| 95 | Cameroon               | 2007       | Cameroon Burden of Diabetes - Second Survey                    | Subnational                 | urban                | 18+                                   | 18+    | 3,118       | 4,108  |      |
| 96 | Canada                 | 1985-1986  | INTERSALT, StJohns                                             | Community                   | urban                | 20-59                                 | 20-59  | 100         | 100    |      |
| 97 | Canada                 | 1985-1988  | MONICA, Halifax                                                | Community                   | both                 | 25-64                                 | 25-64  | 438         | 421    |      |
| 98 | Canada                 | 1986-1992  | Canada Heart Health Survey                                     | National                    | both                 | 18-74                                 | 18-74  | 11,353      | 11,737 |      |
| 99 | Canada                 | 1995       | MONICA, Halifax                                                | Community                   | both                 | 25-64                                 | 25-64  | 274         | 287    |      |



|     | Country                  | Data years | Survey/Study name/Citation                                                                                                                                                                                                                       | Level of representativeness | Rural, urban or both | Age range as in the NCD-RisC database |        | Sample size |        | Note |
|-----|--------------------------|------------|--------------------------------------------------------------------------------------------------------------------------------------------------------------------------------------------------------------------------------------------------|-----------------------------|----------------------|---------------------------------------|--------|-------------|--------|------|
|     |                          |            |                                                                                                                                                                                                                                                  |                             |                      | Male                                  | Female | Male        | Female |      |
| 100 | Canada                   | 2007-2009  | Canadian Health Measures Survey, Cycle 1                                                                                                                                                                                                         | National                    | both                 | 6-79                                  | 6-79   | 3,214       | 3,392  |      |
| 101 | Canada                   | 2009-2011  | Canadian Health Measures Survey, Cycle 2                                                                                                                                                                                                         | National                    | both                 | 6-79                                  | 6-79   | 2,764       | 3,019  |      |
| 102 | Canada                   | 2012-2013  | Canadian Health Measures Survey, Cycle 3                                                                                                                                                                                                         | National                    | both                 | 6-79                                  | 6-79   | 2,594       | 2,619  |      |
| 103 | Canada                   | 2014-2015  | Canadian Health Measures Survey, Cycle 4                                                                                                                                                                                                         | National                    | both                 | 6-79                                  | 6-79   | 2,603       | 2,602  |      |
| 104 | Central African Republic | 2010       | STEPS                                                                                                                                                                                                                                            | Community                   | both                 | 25-64                                 | 25-64  | 1,863       | 1,992  |      |
| 105 | Chad                     | 2008       | STEPS                                                                                                                                                                                                                                            | Community                   | urban                | 25-64                                 | 25-64  | 982         | 822    |      |
| 106 | Chile                    | 1992-1993  | Miquel JF, C. Covarrubias, L. Villarroel, G. Mingrone, A.V. Greco, P. Carvallo, G. Marshall, G. Del Pino, y F. Nervi. Genetic epidemiology of cholesterol cholelithiasis among Chilean Hispanics and Maoris. Gastroenterology 1998; 115: 937-946 | Community                   | urban                | 18+                                   | 18+    | 660         | 1,032  |      |
| 107 | Chile                    | 2000       | Nervi F, Miquel J.F., Alvarez M, Ferreccio C, García-Zattera MJ, González R, Pérez-Ayuso RM, Rigotti A, Villarroel L. Gallbladder disease is associated with insulin resistance in a high risk population. J Hepatol 2006; 45: 299 - 305         | Community                   | urban                | 18+                                   | 18+    | 335         | 625    |      |
| 108 | Chile                    | 2003       | Encuesta Nacional de Salud                                                                                                                                                                                                                       | National                    | both                 | 17+                                   | 17+    | 1,563       | 1,866  |      |
| 109 | Chile                    | 2009-2010  | Encuesta Nacional de Salud                                                                                                                                                                                                                       | National                    | both                 | 15+                                   | 15+    | 1,994       | 2,972  |      |
| 110 | Chile                    | 2011-2012  | Detection and follow-up of cardiovascular disease and risk factors in the Southern Cone of Latin America. The CESCAS I Study                                                                                                                     | Community                   | urban                | 35-74                                 | 35-74  | 923         | 1,027  |      |
| 111 | China                    | 1984-1985  | Sino-MONICA Beijing                                                                                                                                                                                                                              | Subnational                 | both                 | 25-64                                 | 25-64  | 816         | 857    |      |
| 112 | China                    | 1986       | INTERSALT, Tianjin                                                                                                                                                                                                                               | Community                   | urban                | 20-59                                 | 20-59  | 100         | 100    |      |
| 113 | China                    | 1986       | INTERSALT, Beijing                                                                                                                                                                                                                               | Community                   | urban                | 20-59                                 | 20-59  | 100         | 100    |      |
| 114 | China                    | 1986       | INTERSALT, Nanning                                                                                                                                                                                                                               | Community                   | both                 | 20-59                                 | 20-59  | 100         | 100    |      |
| 115 | China                    | 1986-1989  | Sino-MONICA Shanghai                                                                                                                                                                                                                             | Subnational                 | rural                | 25-64                                 | 25-64  | 675         | 753    |      |
| 116 | China                    | 1988       | Sino-MONICA Hebei                                                                                                                                                                                                                                | Subnational                 | both                 | 25-64                                 |        | 610         |        |      |
| 117 | China                    | 1988       | Sino-MONICA Heilongjiang                                                                                                                                                                                                                         | Subnational                 | urban                | 25-64                                 | 25-64  | 800         | 800    |      |
| 118 | China                    | 1988       | Sino-MONICA Henan                                                                                                                                                                                                                                | Subnational                 | urban                | 25-64                                 | 25-64  | 345         | 427    |      |
| 119 | China                    | 1988       | Sino-MONICA Neimenggu                                                                                                                                                                                                                            | Subnational                 | urban                | 25-64                                 | 25-64  | 397         | 400    |      |
| 120 | China                    | 1988       | Sino-MONICA Sichuan                                                                                                                                                                                                                              | Subnational                 | both                 | 25-64                                 | 25-64  | 313         | 334    |      |
| 121 | China                    | 1988       | Sino-MONICA Shandong                                                                                                                                                                                                                             | Subnational                 | urban                | 25-64                                 | 25-64  | 211         | 225    |      |
| 122 | China                    | 1988-1989  | Sino-MONICA Beijing                                                                                                                                                                                                                              | Subnational                 | both                 | 25-64                                 | 25-64  | 703         | 863    |      |
| 123 | China                    | 1988-1989  | Sino-MONICA Jilin                                                                                                                                                                                                                                | Subnational                 | urban                | 25-64                                 | 25-64  | 394         | 408    |      |
| 124 | China                    | 1988-1989  | Sino-MONICA Jiangxi                                                                                                                                                                                                                              | Subnational                 | urban                | 25-64                                 | 25-64  | 379         | 386    |      |
| 125 | China                    | 1988-1989  | Sino-MONICA Liaoning                                                                                                                                                                                                                             | Subnational                 | both                 | 25-64                                 | 25-64  | 728         | 734    |      |
| 126 | China                    | 1988-1990  | East Beijing Study 2                                                                                                                                                                                                                             | Community                   | urban                | 20-84                                 | 20-84  | 139         | 150    |      |
| 127 | China                    | 1989       | Sino-MONICA Fujian                                                                                                                                                                                                                               | Subnational                 | urban                | 25-64                                 | 25-64  | 179         | 191    |      |
| 128 | China                    | 1989       | China Health and Nutrition Study                                                                                                                                                                                                                 | National                    | both                 | 10-45                                 | 10-45  | 2,383       | 2,570  | 1    |
| 129 | China                    | 1989       | Sino-MONICA Jiangsu                                                                                                                                                                                                                              | Subnational                 | rural                | 25-64                                 | 25-64  | 398         | 399    |      |
| 130 | China                    | 1990-1991  | China Prospective Study                                                                                                                                                                                                                          | National                    | both                 | 40-79                                 |        | 221,080     |        |      |
| 131 | China                    | 1991       | China National Hypertension Survey Epidemiology Follow-up Study                                                                                                                                                                                  | National                    | both                 | 40+                                   | 40+    | 83,347      | 86,183 |      |
| 132 | China                    | 1991       | Sino-MONICA Shanghai                                                                                                                                                                                                                             | Subnational                 | rural                | 30-64                                 | 30-64  | 564         | 624    |      |
| 133 | China                    | 1991       | China Health and Nutrition Study                                                                                                                                                                                                                 | National                    | both                 | 10+                                   | 10+    | 5,024       | 5,412  | 1    |
| 134 | China                    | 1991-1992  | Fangshan Cohort Study                                                                                                                                                                                                                            | Community                   | urban                | 34-86                                 | 34-86  | 879         | 1,746  |      |
| 135 | China                    | 1992       | Sino-MONICA Sichuan                                                                                                                                                                                                                              | Subnational                 | both                 | 25-64                                 | 25-64  | 628         | 536    |      |
| 136 | China                    | 1992       | Huashan Study                                                                                                                                                                                                                                    | Community                   | urban                | 35-75                                 | 35-75  | 896         | 970    |      |
| 137 | China                    | 1992-1993  | Anzhen 02 Cohort Study                                                                                                                                                                                                                           | Community                   | urban                | 34-65                                 | 34-65  | 2,032       | 2,120  |      |
| 138 | China                    | 1993       | China Health and Nutrition Study                                                                                                                                                                                                                 | National                    | both                 | 10+                                   | 10+    | 4,759       | 5,073  | 1    |
| 139 | China                    | 1993       | Sino-MONICA Beijing                                                                                                                                                                                                                              | Subnational                 | both                 | 25-64                                 | 25-64  | 613         | 816    |      |
| 140 | China                    | 1993       | Sino-MONICA Jiangsu                                                                                                                                                                                                                              | Subnational                 | urban                | 25-64                                 | 25-64  | 862         | 365    |      |
| 141 | China                    | 1993       | Sino-MONICA Liaoning                                                                                                                                                                                                                             | Subnational                 | both                 | 25-64                                 | 25-64  | 493         | 500    |      |
| 142 | China                    | 1993       | Sino-MONICA Anhui                                                                                                                                                                                                                                | Subnational                 | urban                | 25-64                                 | 25-64  | 193         | 195    |      |
| 143 | China                    | 1997       | China Health and Nutrition Study                                                                                                                                                                                                                 | National                    | both                 | 10+                                   | 10+    | 5,045       | 5,217  | 1    |
| 144 | China                    | 1997       | INTERMAP, Guangxi                                                                                                                                                                                                                                | Community                   | rural                | 40-59                                 | 40-59  | 140         | 138    |      |
| 145 | China                    | 1997       | INTERMAP, Shanxi                                                                                                                                                                                                                                 | Community                   | rural                | 40-59                                 | 40-59  | 143         | 146    |      |

|     | Country               | Data years | Survey/Study name/Citation                                                                   | Level of representativeness | Rural, urban or both | Age range as in the NCD-RisC database |        | Sample size |         | Note |
|-----|-----------------------|------------|----------------------------------------------------------------------------------------------|-----------------------------|----------------------|---------------------------------------|--------|-------------|---------|------|
|     |                       |            |                                                                                              |                             |                      | Male                                  | Female | Male        | Female  |      |
| 146 | China                 | 1997       | INTERMAP, Beijing                                                                            | Community                   | rural                | 40-59                                 | 40-59  | 133         | 139     |      |
| 147 | China                 | 2000       | China Health and Nutrition Study                                                             | National                    | both                 | 10+                                   | 10+    | 5,497       | 5,785   | 1    |
| 148 | China                 | 2000-2001  | The International Collaborative Study of Cardiovascular Disease in ASIA                      | National                    | both                 | 35-74                                 | 35-74  | 7,515       | 8,008   |      |
| 149 | China                 | 2002       | China National Nutrition and Health Survey                                                   | National                    | both                 | 20+                                   | 20+    | 63,471      | 76,623  |      |
| 150 | China                 | 2004       | China Health and Nutrition Study                                                             | National                    | both                 | 10+                                   | 10+    | 4,978       | 5,307   | 1    |
| 151 | China                 | 2004-2008  | China Kadoorie Biobank baseline survey                                                       | Subnational                 | rural                | 35-74                                 | 35-74  | 115,791     | 162,848 |      |
| 152 | China                 | 2004-2008  | China Kadoorie Biobank baseline survey                                                       | Subnational                 | urban                | 35-74                                 | 35-74  | 89,218      | 132,859 |      |
| 153 | China                 | 2006       | Beijing Eye Study                                                                            | Community                   | both                 | 45+                                   | 45+    | 1,396       | 1,826   |      |
| 154 | China                 | 2006       | China Health and Nutrition Study                                                             | National                    | both                 | 10+                                   | 10+    | 4,750       | 5,238   | 1    |
| 155 | China                 | 2008       | China Health and Retirement Longitudinal Study (CHARLS), pilot survey                        | Subnational                 | both                 | 45+                                   | 45+    | 934         | 960     |      |
| 156 | China                 | 2008-2009  | Chinese Longitudinal Healthy Longevity Survey                                                | National                    | both                 | 65+                                   | 65+    | 6,743       | 8,965   |      |
| 157 | China                 | 2007-2010  | SAGE                                                                                         | National                    | both                 | 50+                                   | 50+    | 5,808       | 6,689   |      |
| 158 | China                 | 2008-2010  | Fangshan Family-based Ischemic Stroke Study in China (FISSIC) program                        | Community                   | rural                | 40+                                   | 40+    | 20,241      | 37,772  |      |
| 159 | China                 | 2009       | China Health and Nutrition Study                                                             | National                    | both                 | 10+                                   | 10+    | 4,940       | 5,291   | 1    |
| 160 | China                 | 2010       | China Noncommunicable Disease Surveillance                                                   | National                    | both                 | 18+                                   | 18+    | 45,077      | 53,460  |      |
| 161 | China                 | 2011       | Beijing Eye Study                                                                            | Community                   | both                 | 50+                                   | 50+    | 1,499       | 1,949   |      |
| 162 | China                 | 2011       | China Health and Nutrition Study                                                             | National                    | both                 | 10+                                   | 10+    | 6,377       | 7,116   | 1    |
| 163 | China                 | 2011-2012  | China Health and Retirement Longitudinal Study (CHARLS), baseline survey                     | National                    | both                 | 45+                                   | 45+    | 6,416       | 7,077   |      |
| 164 | China                 | 2012       | China Health and Retirement Longitudinal Study (CHARLS), wave 2 pilot survey                 | Subnational                 | both                 | 45+                                   | 45+    | 873         | 957     |      |
| 165 | China                 | 2012-2013  | The Kailuan Study                                                                            | Community                   | urban                | 18+                                   | 18+    | 81,496      | 21,590  |      |
| 166 | China                 | 2013       | China Health and Retirement Longitudinal Study (CHARLS), wave 2 survey                       | National                    | both                 | 45+                                   | 45+    | 6,031       | 6,711   |      |
| 167 | China                 | 2012-2015  | Shanghai Men's Health Study                                                                  | Community                   | urban                | 47-87                                 |        | 33,177      |         |      |
| 168 | China                 | 2012-2015  | Shanghai Women's Health Study                                                                | Community                   | urban                |                                       | 52-88  |             | 42,981  |      |
| 169 | China (Hong Kong SAR) | 1985-1986  | Shatin New Town Study                                                                        | Community                   | urban                | 70+                                   | 70+    | 285         | 697     |      |
| 170 | China (Hong Kong SAR) | 1991       | The Hong Kong study on Health, health risk and quality of life in the Chinese elderly cohort | Community                   | both                 | 70+                                   | 70+    | 992         | 1,027   |      |
| 171 | China (Hong Kong SAR) | 1995-1996  | Hong Kong Cardiovascular Risk Factor Prevalence Study 1995-1996                              | National                    | both                 | 25-74                                 | 25-74  | 1,410       | 1,482   |      |
| 172 | Colombia              | 1986       | INTERSALT                                                                                    | Community                   | rural                | 20-59                                 | 20-59  | 96          | 95      |      |
| 173 | Colombia              | 2007       | Encuesta Nacional de Salud                                                                   | National                    | both                 | 18-69                                 | 18-69  | 5,510       | 7,744   |      |
| 174 | Colombia              | 2010       | STEPS                                                                                        | Subnational                 | both                 | 15-64                                 | 15-64  | 984         | 1,302   |      |
| 175 | Colombia              | 2015       | STEPS                                                                                        | Subnational                 | both                 | 15-64                                 | 15-64  | 978         | 1,180   |      |
| 176 | Comoros               | 2011       | STEPS                                                                                        | National                    | both                 | 25-64                                 | 25-64  | 1,568       | 3,591   |      |
| 177 | Congo                 | 2004       | STEPS                                                                                        | Community                   | urban                | 25-64                                 | 25-64  | 1,014       | 914     |      |
| 178 | Cook Islands          | 2003       | STEPS                                                                                        | National                    | both                 | 25-64                                 | 25-64  | 925         | 959     |      |
| 179 | Cook Islands          | 2014       | STEPS                                                                                        | National                    | both                 | 18-64                                 | 18-64  | 460         | 475     |      |
| 180 | Costa Rica            | 2004       | CAMDI                                                                                        | Community                   | urban                | 20+                                   | 20+    | 522         | 895     |      |
| 181 | Costa Rica            | 2004-2006  | Costa Rican Longevity and Healthy Aging Study Pre-1945 Cohort Wave 1                         | National                    | both                 | 60+                                   | 60+    | 1,278       | 1,515   |      |
| 182 | Costa Rica            | 2006-2008  | Costa Rican Longevity and Healthy Aging Study Pre-1945 Cohort Wave 2                         | National                    | both                 | 62+                                   | 62+    | 1,060       | 1,261   |      |
| 183 | Costa Rica            | 2009-2010  | Costa Rican Longevity and Healthy Aging Study Pre-1945 Cohort Wave 3                         | National                    | both                 | 64+                                   | 64+    | 808         | 1,008   |      |
| 184 | Costa Rica            | 2010       | Costa Rican National Cardiovascular Risk Factors Survey, 2010                                | National                    | both                 | 20+                                   | 20+    | 1,016       | 2,618   |      |
| 185 | Cote d'Ivoire         | 2005       | STEPS                                                                                        | National                    | urban                | 15-64                                 | 15-64  | 1,074       | 1,440   |      |
| 186 | Cote d'Ivoire         | 2005       | STEPS                                                                                        | National                    | rural                | 15-64                                 | 15-64  | 890         | 1,019   |      |
| 187 | Croatia               | 2003       | 2003 CAHS - Croatian Health Survey project of the Ministry of Health and Social Welfare      | National                    | both                 | 18+                                   | 18+    | 2,878       | 6,162   |      |
| 188 | Croatia               | 2005       | Endemic Nephropathy and Arterial hypertension (ENAH)                                         | Subnational                 | rural                | 18+                                   | 18+    | 267         | 401     |      |
| 189 | Croatia               | 2008       | Endemic Nephropathy and Arterial hypertension (ENAH)                                         | Subnational                 | rural                | 18+                                   | 18+    | 263         | 465     |      |
| 190 | Croatia               | 2010       | Endemic Nephropathy and Arterial hypertension (ENAH)                                         | Subnational                 | rural                | 18+                                   | 18+    | 258         | 406     |      |
| 191 | Croatia               | 2015       | Endemic Nephropathy and Arterial hypertension (ENAH) Follow-up Study                         | Subnational                 | rural                | 18+                                   | 18+    | 225         | 462     |      |
| 192 | Cuba                  | 1999-2000  | The Survey on Health, Well-Being, and Aging in Latin America and the Caribbean               | Community                   | urban                | 60+                                   | 60+    | 645         | 1,087   | 2    |
| 193 | Cuba                  | 2010       | National Risk Factor Survey                                                                  | National                    | both                 | 15+                                   | 15+    | 3,350       | 3,884   |      |
| 194 | Cuba                  | 2011       | Non communicable disease risk factor in Cienfuegos                                           | Community                   | urban                | 15-74                                 | 15-74  | 616         | 880     |      |
| 195 | Czech Republic        | 1985       | MONICA, Czech Republic                                                                       | National                    | both                 | 25-64                                 | 25-64  | 1,245       | 1,309   |      |
| 196 | Czech Republic        | 1988       | MONICA, Czech Republic                                                                       | National                    | both                 | 25-64                                 | 25-64  | 1,357       | 1,411   |      |

|     | Country        | Data years | Survey/Study name/Citation                                                                      | Level of representativeness | Rural, urban or both | Age range as in the NCD-RisC database |        | Sample size |        | Note |
|-----|----------------|------------|-------------------------------------------------------------------------------------------------|-----------------------------|----------------------|---------------------------------------|--------|-------------|--------|------|
|     |                |            |                                                                                                 |                             |                      | Male                                  | Female | Male        | Female |      |
| 197 | Czech Republic | 1992       | MONICA, Czech Republic                                                                          | National                    | both                 | 25-64                                 | 25-64  | 1,134       | 1,209  |      |
| 198 | Czech Republic | 1997-1998  | Czech post-MONICA                                                                               | National                    | both                 | 25-64                                 | 25-64  | 1,529       | 1,666  |      |
| 199 | Czech Republic | 2000-2001  | Czech post-MONICA                                                                               | National                    | both                 | 25-64                                 | 25-64  | 1,631       | 1,690  |      |
| 200 | Czech Republic | 2002-2005  | Health, Alcohol and Psychosocial factors In Eastern Europe                                      | Subnational                 | urban                | 45-69                                 | 45-69  | 3,240       | 3,887  |      |
| 201 | Czech Republic | 2007-2008  | Czech post-MONICA                                                                               | National                    | both                 | 25-64                                 | 25-64  | 1,718       | 1,861  |      |
| 202 | Denmark        | 1985       | INTERSALT                                                                                       | Community                   | urban                | 20-59                                 | 20-59  | 99          | 100    |      |
| 203 | Denmark        | 1991-1992  | MONICA, Glostrup                                                                                | Community                   | urban                | 29-61                                 | 29-61  | 808         | 816    |      |
| 204 | Denmark        | 1992-1994  | Obesity Research Group-Copenhagen City Heart Study 3                                            | Subnational                 | both                 | 33-73                                 |        | 922         |        |      |
| 205 | Denmark        | 1993-1997  | EPIC Aarhus                                                                                     | Community                   | urban                | 50-65                                 | 50-65  | 8,424       | 8,712  |      |
| 206 | Denmark        | 1993-1997  | EPIC Copenhagen                                                                                 | Community                   | urban                | 50-65                                 | 50-65  | 18,717      | 21,114 |      |
| 207 | Denmark        | 2006-2008  | The Health2006 Cohort                                                                           | Community                   | urban                | 18-71                                 | 18-71  | 1,553       | 1,918  |      |
| 208 | Denmark        | 2007-2008  | The Danish Health Examination Survey 2007-2008                                                  | National                    | both                 | 18+                                   | 18+    | 7,358       | 10,655 |      |
| 209 | Denmark        | 2012-2015  | Danish study of Functional Disorders (DanFunD)                                                  | Subnational                 | urban                | 18-72                                 | 18-72  | 3,455       | 4,036  |      |
| 210 | Dominica       | 2007       | STEPS                                                                                           | National                    | both                 | 15-64                                 | 15-64  | 459         | 557    |      |
| 211 | DR Congo       | 2005       | STEPS                                                                                           | Community                   | urban                | 15+                                   | 15+    | 761         | 1,152  |      |
| 212 | Ecuador        | 2011-2013  | Encuesta Nacional de Salud y Nutricion                                                          | National                    | both                 | 10-59                                 | 10-59  | 18,673      | 24,035 |      |
| 213 | Egypt          | 1991-1993  | The Egyptian National Hypertension Study                                                        | National                    | both                 | 25+                                   | 25+    | 3,253       | 4,201  |      |
| 214 | Egypt          | 2002       | National Survey of Smoking, Obesity, Blood Pressure and Blood Glucose                           | National                    | both                 | 10+                                   | 10+    | 2,808       | 3,444  |      |
| 215 | Egypt          | 2003-2004  | Metabolic and cardiovascular risk profiles and hepatitis C virus infection in rural Egypt       | Community                   | rural                | 25+                                   | 25+    | 316         | 446    |      |
| 216 | Egypt          | 2005       | STEPS                                                                                           | National                    | both                 | 15-65                                 | 15-65  | 4,743       | 4,418  |      |
| 217 | Egypt          | 2007-2009  | Hepatitis C infection and clearance: impact on atherosclerosis and cardiometabolic risk factors | Community                   | rural                | 35+                                   | 35+    | 638         | 840    |      |
| 218 | Egypt          | 2008       | Demographic and Health Survey Egypt 2008                                                        | National                    | both                 | 10-59                                 | 10-59  | 5,424       | 6,156  |      |
| 219 | Egypt          | 2011       | STEPS                                                                                           | National                    | both                 | 15-65                                 | 15-65  | 1,775       | 3,009  |      |
| 220 | Egypt          | 2015       | Demographic and Health Survey Egypt 2015                                                        | National                    | both                 | 15-59                                 | 15-59  | 7,429       | 8,639  |      |
| 221 | El Salvador    | 2004       | CAMDI                                                                                           | Community                   | urban                | 20+                                   | 20+    | 397         | 811    |      |
| 222 | Eritrea        | 2004       | STEPS                                                                                           | National                    | both                 | 15-64                                 | 15-64  | 1,145       | 1,109  |      |
| 223 | Eritrea        | 2010       | STEPS                                                                                           | National                    | both                 | 25-74                                 | 25-74  | 1,713       | 4,290  |      |
| 224 | Estonia        |            | Abina et al., Blood Press 2003; 12: 111-21                                                      | Community                   | urban                | 20-54                                 | 20-54  |             |        |      |
| 225 | Estonia        |            | Abina et al., Blood Press 2003; 12: 111-21                                                      | Community                   | urban                | 20-54                                 | 20-54  |             |        |      |
| 226 | Estonia        |            | Abina et al., Blood Press 2003; 12: 111-21                                                      | Community                   | urban                | 20-54                                 | 20-54  |             |        |      |
| 227 | Estonia        | 2002       | Estonian Biobank                                                                                | National                    | both                 | 18+                                   | 18+    | 89          | 216    |      |
| 228 | Estonia        | 2003       | The European Male Ageing Study                                                                  | Community                   | both                 | 40+                                   |        | 419         |        |      |
| 229 | Estonia        | 2003       | Estonian Biobank                                                                                | National                    | both                 | 18+                                   | 18+    | 2,685       | 5,668  |      |
| 230 | Estonia        | 2004       | Estonian Biobank                                                                                | National                    | both                 | 18+                                   | 18+    | 527         | 944    |      |
| 231 | Estonia        | 2007       | Estonian Biobank                                                                                | National                    | both                 | 18+                                   | 18+    | 1,000       | 2,185  |      |
| 232 | Estonia        | 2008       | The European Male Ageing Study                                                                  | Community                   | both                 | 40+                                   |        | 306         |        |      |
| 233 | Estonia        | 2008       | Estonian Biobank                                                                                | National                    | both                 | 18+                                   | 18+    | 5,148       | 10,967 |      |
| 234 | Estonia        | 2009       | Estonian Biobank                                                                                | National                    | both                 | 18+                                   | 18+    | 3,963       | 6,489  |      |
| 235 | Estonia        | 2010       | Estonian Biobank                                                                                | National                    | both                 | 18+                                   | 18+    | 4,054       | 7,042  |      |
| 236 | Estonia        | 2011       | Estonian Biobank                                                                                | National                    | both                 | 18+                                   | 18+    | 111         | 174    |      |
| 237 | Estonia        | 2012       | Estonian Biobank                                                                                | National                    | both                 | 18+                                   | 18+    | 89          | 130    |      |
| 238 | Estonia        | 2013       | Estonian Biobank                                                                                | National                    | both                 | 18+                                   | 18+    | 110         | 146    |      |
| 239 | Ethiopia       | 2006       | Surveillance of NCD Risk Factors in Addis Ababa (STEPS_Addis2006)                               | Subnational                 | urban                | 25-64                                 | 25-64  | 1,646       | 2,317  |      |
| 240 | Fiji           | 2002       | STEPS                                                                                           | National                    | both                 | 15-64                                 | 15-64  | 2,686       | 3,819  |      |
| 241 | Fiji           | 2011       | STEPS                                                                                           | National                    | both                 | 25-64                                 | 25-64  | 1,118       | 1,413  |      |
| 242 | Finland        | 1985       | INTERSALT, Turku                                                                                | Community                   | urban                | 20-59                                 | 20-59  | 100         | 100    |      |
| 243 | Finland        | 1985-1986  | INTERSALT, Joensuu                                                                              | Community                   | urban                | 20-59                                 | 20-59  | 100         | 100    |      |
| 244 | Finland        | 1987       | MONICA, North Karelia/Kuopio/Turku/Loimaa                                                       | Subnational                 | both                 | 25-64                                 | 25-64  | 2,898       | 3,152  |      |
| 245 | Finland        | 1989       | Finnish cohort of the FINE study                                                                | Community                   | rural                | 70-89                                 |        | 462         |        |      |
| 246 | Finland        | 1992       | The National FINRISK Study                                                                      | Subnational                 | both                 | 25-64                                 | 25-64  | 2,847       | 3,201  |      |
| 247 | Finland        | 1996-1998  | Savitaipale Study, Baseline                                                                     | Community                   | rural                | 40-66                                 | 40-66  | 573         | 573    |      |

|     | Country          | Data years | Survey/Study name/Citation                                                                    | Level of representativeness | Rural, urban or both | Age range as in the NCD-RisC database |        | Sample size |        | Note |
|-----|------------------|------------|-----------------------------------------------------------------------------------------------|-----------------------------|----------------------|---------------------------------------|--------|-------------|--------|------|
|     |                  |            |                                                                                               |                             |                      | Male                                  | Female | Male        | Female |      |
| 248 | Finland          | 1997       | The National FINRISK Study                                                                    | National                    | both                 | 25-74                                 | 25-74  | 4,248       | 4,184  |      |
| 249 | Finland          | 2000-2001  | Health 2000 Survey                                                                            | National                    | both                 | 30+                                   | 30+    | 2,870       | 3,463  |      |
| 250 | Finland          | 2002       | The National FINRISK Study                                                                    | National                    | both                 | 25-74                                 | 25-74  | 3,267       | 3,814  |      |
| 251 | Finland          | 2001-2004  | Helsinki Birth Cohort Study                                                                   | Community                   | urban                | 56-69                                 | 56-69  | 928         | 1,075  |      |
| 252 | Finland          | 2007       | The National FINRISK Study                                                                    | National                    | both                 | 25-74                                 | 25-74  | 2,926       | 3,310  |      |
| 253 | Finland          | 2007-2008  | Savitaipale Study, Follow-up                                                                  | Community                   | rural                | 51-75                                 | 51-75  | 433         | 484    |      |
| 254 | Finland          | 2008       | Control group for Finnish male former elite athletes                                          | National                    | both                 | 61+                                   |        | 207         |        |      |
| 255 | Finland          | 2011-2012  | Health 2011 Survey                                                                            | National                    | both                 | 30+                                   | 30+    | 2,061       | 2,563  |      |
| 256 | Finland          | 2012       | The National FINRISK Study                                                                    | National                    | both                 | 25-74                                 | 25-74  | 2,771       | 3,042  |      |
| 257 | France           | 1985-1987  | MONICA, Strasbourg                                                                            | Subnational                 | both                 | 35-64                                 | 35-64  | 667         | 714    |      |
| 258 | France           | 1985-1987  | MONICA, Toulouse                                                                              | Subnational                 | both                 | 35-64                                 | 35-64  | 678         | 645    |      |
| 259 | France           | 1986-1989  | MONICA, Lille                                                                                 | Community                   | urban                | 25-64                                 | 25-64  | 882         | 737    |      |
| 260 | France           | 1988-1991  | MONICA, Toulouse                                                                              | Subnational                 | both                 | 35-64                                 | 35-64  | 586         |        |      |
| 261 | France           | 1994-1996  | MONICA, Toulouse                                                                              | Subnational                 | both                 | 35-64                                 | 35-64  | 609         | 566    |      |
| 262 | France           | 1995-1997  | MONICA, Lille                                                                                 | Community                   | urban                | 36-67                                 | 36-66  | 598         | 594    |      |
| 263 | France           | 1995-1997  | MONICA, Strasbourg                                                                            | Subnational                 | both                 | 35-64                                 | 35-64  | 527         | 533    |      |
| 264 | France           | 1999-2001  | The Three city Study                                                                          | Community                   | urban                | 65+                                   | 65+    | 3,511       | 5,412  |      |
| 265 | France           | 2001-2003  | The Three city Study                                                                          | Community                   | urban                | 66+                                   | 66+    | 3,087       | 4,869  |      |
| 266 | France           | 2003-2005  | The Three city Study                                                                          | Community                   | urban                | 68+                                   | 68+    | 2,692       | 4,371  |      |
| 267 | France           | 2004-2006  | National Monitoring of Arterial Risk in Lille (MONA LISA Lille)                               | Community                   | urban                | 35-75                                 | 35-75  | 797         | 796    |      |
| 268 | France           | 2005-2007  | National Monitoring of Arterial Risk in Bas-Rhin (MONA LISA Bas-Rhin)                         | Subnational                 | both                 | 35-74                                 | 35-74  | 781         | 785    |      |
| 269 | France           | 2006-2007  | Etude Nationale Nutrition Santé                                                               | National                    | both                 | 18-74                                 | 18-74  | 792         | 1,330  |      |
| 270 | France           | 2011-2013  | Enquête Littorale Souffle Air Biologie Environnement (ELISABET) Lille                         | Community                   | urban                | 40-64                                 | 40-64  | 753         | 850    |      |
| 271 | France           | 2011-2013  | Enquête Littorale Souffle Air Biologie Environnement (ELISABET) Dunkerque                     | Community                   | urban                | 40-64                                 | 40-64  | 749         | 798    |      |
| 272 | French Polynesia | 2010       | STEPS                                                                                         | National                    | both                 | 18-64                                 | 18-64  | 993         | 1,308  |      |
| 273 | Gabon            | 2009       | STEPS                                                                                         | Community                   | urban                | 15-64                                 | 15-64  | 1,061       | 1,539  |      |
| 274 | Gambia           | 2010       | STEPS                                                                                         | National                    | both                 | 25-64                                 | 25-64  | 1,643       | 1,953  |      |
| 275 | Georgia          | 2010       | STEPS                                                                                         | National                    | both                 | 18-64                                 | 18-64  | 1,849       | 4,476  |      |
| 276 | Georgia          | 2016       | STEPS                                                                                         | National                    | both                 | 18-69                                 | 18-69  | 1,193       | 2,789  |      |
| 277 | Germany          | 1984-1985  | MONICA, Augsburg                                                                              | Community                   | both                 | 25-64                                 | 25-64  | 2,017       | 1,991  |      |
| 278 | Germany          | 1984-1986  | MONICA, Cottbus County                                                                        | Community                   | urban                | 25-64                                 | 25-64  | 657         | 739    |      |
| 279 | Germany          | 1985-1986  | INTERSALT, Heidelberg                                                                         | Community                   | urban                | 20-59                                 | 20-59  | 97          | 99     |      |
| 280 | Germany          | 1985-1986  | INTERSALT, Cottbus                                                                            | Community                   | urban                | 20-59                                 | 20-59  | 99          | 99     |      |
| 281 | Germany          | 1985-1986  | INTERSALT, Bernried                                                                           | Community                   | urban                | 20-59                                 | 20-59  | 99          | 98     |      |
| 282 | Germany          | 1987-1988  | MONICA, Erfurt                                                                                | Community                   | urban                | 25-64                                 | 25-64  | 879         | 915    |      |
| 283 | Germany          | 1988       | MONICA, Berlin-Lichtenberg                                                                    | Community                   | urban                | 25-64                                 | 25-64  | 689         | 727    |      |
| 284 | Germany          | 1988       | MONICA, Bremen North/West                                                                     | Community                   | urban                | 25-69                                 | 25-69  | 621         | 632    |      |
| 285 | Germany          | 1988       | German Cardiovascular Prevention Study (GCP) - National Health Survey 1988                    | Subnational                 | both                 | 25-69                                 | 25-69  | 2,647       | 2,684  |      |
| 286 | Germany          | 1988       | MONICA, Chemnitz                                                                              | Community                   | urban                | 25-64                                 | 25-64  | 288         | 382    |      |
| 287 | Germany          | 1988       | MONICA, Zwickau                                                                               | Community                   | urban                | 25-64                                 | 25-64  | 193         | 250    |      |
| 288 | Germany          | 1988       | MONICA, Bremen Center/South/East                                                              | Community                   | urban                | 25-69                                 | 25-69  | 502         | 582    |      |
| 289 | Germany          | 1988-1989  | MONICA, Rest of Karl-Marx-Stadt County                                                        | Subnational                 | urban                | 25-64                                 | 25-64  | 543         | 626    |      |
| 290 | Germany          | 1988-1989  | MONICA, Halle County                                                                          | Subnational                 | urban                | 25-64                                 | 25-64  | 963         | 1,202  |      |
| 291 | Germany          | 1989-1990  | MONICA, Cottbus County                                                                        | Community                   | urban                | 25-64                                 | 25-64  | 542         | 529    |      |
| 292 | Germany          | 1989-1990  | MONICA, Augsburg                                                                              | Community                   | both                 | 25-64                                 | 25-64  | 1,952       | 1,997  |      |
| 293 | Germany          | 1991-1992  | MONICA, Bremen Center/South/East                                                              | Community                   | urban                | 25-69                                 | 25-69  | 524         | 547    |      |
| 294 | Germany          | 1991-1992  | MONICA, Bremen North/West                                                                     | Community                   | urban                | 25-69                                 | 25-69  | 598         | 672    |      |
| 295 | Germany          | 1991-1992  | German Cardiovascular Prevention Study (GCP) - National Health Survey 1991                    | Subnational                 | both                 | 25-69                                 | 25-69  | 2,622       | 2,686  |      |
| 296 | Germany          | 1991-1992  | First National Examination of life conditions, Environment and Health in East Germany 1991/92 | Subnational                 | both                 | 25-69                                 | 25-69  | 1,051       | 1,160  |      |
| 297 | Germany          | 1991-1992  | MONICA, Erfurt                                                                                | Community                   | urban                | 25-64                                 | 25-64  | 588         | 574    |      |
| 298 | Germany          | 1993-1994  | MONICA, Zwickau                                                                               | Community                   | urban                | 25-64                                 | 25-64  | 139         | 186    |      |

|     | Country   | Data years | Survey/Study name/Citation                                                                                                                        | Level of representativeness | Rural, urban or both | Age range as in the NCD-RisC database |        | Sample size |        | Note |
|-----|-----------|------------|---------------------------------------------------------------------------------------------------------------------------------------------------|-----------------------------|----------------------|---------------------------------------|--------|-------------|--------|------|
|     |           |            |                                                                                                                                                   |                             |                      | Male                                  | Female | Male        | Female |      |
| 299 | Germany   | 1993-1994  | MONICA, Chemnitz                                                                                                                                  | Community                   | urban                | 25-64                                 | 25-64  | 407         | 426    |      |
| 300 | Germany   | 1994-1995  | MONICA, Augsburg                                                                                                                                  | Community                   | both                 | 25-64                                 | 25-64  | 1,905       | 1,994  |      |
| 301 | Germany   | 1994-1998  | EPIC Potsdam                                                                                                                                      | Community                   | urban                | 40-64                                 | 35-64  | 9,541       | 15,239 |      |
| 302 | Germany   | 1994-1998  | EPIC Heidelberg                                                                                                                                   | Community                   | urban                | 40-64                                 | 35-64  | 4,396       | 5,369  |      |
| 303 | Germany   | 1997-1999  | German National Health Interview and Examination Survey (GNHIES98)                                                                                | National                    | both                 | 18-79                                 | 18-79  | 3,445       | 3,616  |      |
| 304 | Germany   | 1997-2001  | Study of Health in Pomerania (SHIP-0) baseline study                                                                                              | Subnational                 | both                 | 20-80                                 | 20-80  | 2,112       | 2,187  |      |
| 305 | Germany   | 1999-2001  | KORA S4 Study: Kooperative Research in the Region of Augsburg Survey 4                                                                            | Community                   | both                 | 24-75                                 | 24-75  | 2,082       | 2,161  |      |
| 306 | Germany   | 2000-2002  | Epidemiological study of the chances of prevention, early recognition and optimal treatment of chronic diseases in an elderly population (ESTHER) | Subnational                 | both                 | 50-75                                 | 50-75  | 4,315       | 5,306  |      |
| 307 | Germany   | 2002-2006  | Study of Health in Pomerania (SHIP-1) 5-year follow-up                                                                                            | Subnational                 | both                 | 25-85                                 | 25-85  | 1,584       | 1,707  |      |
| 308 | Germany   | 2006-2008  | KORA F4 Study: Kooperative Research in the Region of Augsburg Follow-Up of Survey 4                                                               | Community                   | both                 | 31-82                                 | 31-82  | 1,482       | 1,591  |      |
| 309 | Germany   | 2008-2011  | Epidemiological study of the chances of prevention, early recognition and optimal treatment of chronic diseases in an elderly population (ESTHER) | Subnational                 | both                 | 58-84                                 | 58-84  | 1,297       | 1,443  |      |
| 310 | Germany   | 2008-2011  | German Health Interview and Examination Survey for adults 2008-11 (DEGS1)                                                                         | National                    | both                 | 18-79                                 | 18-79  | 3,405       | 3,665  |      |
| 311 | Germany   | 2008-2012  | Study of Health in Pomerania, second cohort (SHIP-TREND)                                                                                          | Subnational                 | both                 | 20-79                                 | 20-79  | 2,095       | 2,228  |      |
| 312 | Ghana     | 2006       | STEPS                                                                                                                                             | Community                   | urban                | 25+                                   | 25+    | 887         | 1,698  |      |
| 313 | Ghana     | 2007-2008  | SAGE                                                                                                                                              | National                    | both                 | 50+                                   | 50+    | 2,215       | 2,034  |      |
| 314 | Ghana     | 2012       | The Burden and Correlates of Hypertension in Rural Ghana: A Cross-Sectional Study                                                                 | Subnational                 | rural                | 35+                                   | 35+    | 150         | 271    |      |
| 315 | Ghana     | 2012-2014  | Research on Obesity and Diabetes among African Migrants (RODAM), control group                                                                    | Subnational                 | urban                | 25+                                   | 25+    | 419         | 1,033  |      |
| 316 | Ghana     | 2012-2014  | Research on Obesity and Diabetes among African Migrants (RODAM), control group                                                                    | Subnational                 | rural                | 25+                                   | 25+    | 431         | 679    |      |
| 317 | Ghana     | 2013       | Silent Crisis: Epidemic Hypertension in Rural West Africa                                                                                         | Subnational                 | rural                | 35+                                   | 35+    | 151         | 278    |      |
| 318 | Ghana     | 2014       | Demographic and Health Survey Ghana 2014                                                                                                          | National                    | both                 | 10+                                   | 10+    | 4,378       | 9,013  |      |
| 319 | Greece    | 1991-1999  | EPIC                                                                                                                                              | National                    | both                 | 19-86                                 | 19-86  | 11,120      | 15,885 |      |
| 320 | Greece    | 1997       | The Didima Study                                                                                                                                  | Community                   | rural                | 18+                                   | 18+    | 278         | 387    |      |
| 321 | Greece    | 2016       | SKG-Elderly                                                                                                                                       | Community                   | urban                | 60+                                   | 60+    | 51          | 63     |      |
| 322 | Greenland | 2005-2010  | Population Health Survey in Greenland                                                                                                             | National                    | both                 | 18+                                   | 18+    | 1,351       | 1,725  |      |
| 323 | Grenada   | 2011       | STEPS                                                                                                                                             | National                    | both                 | 25-64                                 | 25-64  | 440         | 646    |      |
| 324 | Guatemala | 2001-2002  | CAMDI                                                                                                                                             | Community                   | urban                | 20+                                   | 20+    | 454         | 940    |      |
| 325 | Guatemala | 2003-2005  | The Institute of Nutrition of Central America and Panama Nutrition Supplementation Trial Cohort                                                   | Community                   | both                 | 25-41                                 | 25-41  | 265         | 304    |      |
| 326 | Guinea    | 2009       | STEPS                                                                                                                                             | Subnational                 | both                 | 15-64                                 | 15-64  | 1,139       | 1,246  |      |
| 327 | Honduras  | 2003-2004  | CAMDI                                                                                                                                             | Community                   | urban                | 20+                                   | 20+    | 437         | 792    |      |
| 328 | Hungary   | 1985       | INTERSALT                                                                                                                                         | Community                   | rural                | 20-59                                 | 20-59  | 100         | 100    |      |
| 329 | Hungary   | 2003       | The European Male Ageing Study                                                                                                                    | Community                   | both                 | 40+                                   |        | 430         |        |      |
| 330 | Hungary   | 2008       | The European Male Ageing Study                                                                                                                    | Community                   | both                 | 40+                                   |        | 349         |        |      |
| 331 | Iceland   | 1985-1986  | INTERSALT                                                                                                                                         | Community                   | urban                | 20-59                                 | 20-59  | 100         | 100    |      |
| 332 | Iceland   | 1988-1989  | MONICA, Arnes County                                                                                                                              | Community                   | rural                | 25-64                                 | 25-64  | 388         | 442    |      |
| 333 | Iceland   | 1988-1989  | MONICA, Reykjavik                                                                                                                                 | Subnational                 | urban                | 25-64                                 | 25-64  | 413         | 445    |      |
| 334 | Iceland   | 1993-1994  | MONICA, Reykjavik                                                                                                                                 | Subnational                 | urban                | 25-64                                 | 25-64  | 443         | 449    |      |
| 335 | Iceland   | 1993-1994  | MONICA, Arnes County                                                                                                                              | Community                   | rural                | 25-64                                 | 25-64  | 422         | 484    |      |
| 336 | Iceland   | 2002-2006  | AGES-Reykjavik Study                                                                                                                              | Subnational                 | urban                | 66-96                                 | 66-96  | 2,420       | 3,287  |      |
| 337 | Iceland   | 2005-2011  | Risk Evaluation For Infarct Estimates (REFINE)                                                                                                    | Subnational                 | urban                | 20-73                                 | 20-73  | 3,403       | 3,527  |      |
| 338 | Iceland   | 2010-2012  | Risk Evaluation For Infarct Estimates (REFINE) follow-up visit (REFINELO)                                                                         | Subnational                 | urban                | 26-74                                 | 26-74  | 654         | 669    |      |
| 339 | Iceland   | 2012-2013  | Risk Evaluation For Infarct Estimates (REFINE) follow-up visit (REFLOCT)                                                                          | Subnational                 | urban                | 55-73                                 | 55-73  | 516         | 561    |      |
| 340 | India     | 1986       | INTERSALT                                                                                                                                         | Community                   | urban                | 20-59                                 | 20-59  | 100         | 99     |      |
| 341 | India     | 1988-1989  | Ramachandran et al., Diabetes Res Clin Pract 58:55-60, 2002                                                                                       | Community                   | urban                | 20-74                                 | 20-74  | 455         | 435    |      |
| 342 | India     | 1992-1994  | Jaipur Heart Watch 1                                                                                                                              | Community                   | urban                | 20-80                                 | 20-80  | 1,389       | 785    |      |
| 343 | India     | 1992-1994  | Jaipur Heart Watch 1                                                                                                                              | Community                   | rural                | 20-80                                 | 20-80  | 1,971       | 1,159  |      |
| 344 | India     | 1995       | Ramachandran et al., Diabetes Res Clin Pract 42:181-6, 1998                                                                                       | Community                   | urban                | 20-74                                 | 20-74  | 1,061       | 1,093  |      |
| 345 | India     | 1995-1996  | Epidemiology of blood pressure across cross-cultural populations of Visakhapatnam district, Andhra Pradesh, India                                 | Community                   | rural                | 19-76                                 | 19-76  | 210         | 228    |      |
| 346 | India     | 1995-1997  | Aravind Comprehensive Eye Survey                                                                                                                  | Community                   | rural                | 40+                                   | 40+    | 2,200       | 2,672  |      |

|     | Country   | Data years | Survey/Study name/Citation                                                                                                            | Level of representativeness | Rural, urban or both | Age range as in the NCD-RisC database |        | Sample size |         | Note |
|-----|-----------|------------|---------------------------------------------------------------------------------------------------------------------------------------|-----------------------------|----------------------|---------------------------------------|--------|-------------|---------|------|
|     |           |            |                                                                                                                                       |                             |                      | Male                                  | Female | Male        | Female  |      |
| 347 | India     | 1997       | Ramachandran et al., Diabetes Res Clin Pract 44:207–13, 1999                                                                          | Community                   | rural                | 20-74                                 | 20-74  | 738         | 879     |      |
| 348 | India     | 1996-1999  | Chennai Urban Population Study                                                                                                        | Community                   | urban                | 20+                                   | 20+    | 557         | 705     |      |
| 349 | India     | 1999-2001  | Jaipur Heart Watch 2                                                                                                                  | Community                   | urban                | 20-75                                 | 20-75  | 531         | 569     |      |
| 350 | India     | 2001-2004  | Chennai Urban Rural Epidemiology Study                                                                                                | Community                   | urban                | 20+                                   | 20+    | 1,095       | 1,252   |      |
| 351 | India     | 2002-2003  | Blood Pressure epidemiology in tribal, rural and urban communities of Orissa with special reference to physical and social parameters | Community                   | rural                | 18-80                                 | 18-80  | 201         | 187     |      |
| 352 | India     | 2003-2005  | WHO-ICMR NCD risk factor surveillance study                                                                                           | National                    | urban                | 15-69                                 | 15-69  | 6,553       | 6,727   |      |
| 353 | India     | 2003-2005  | WHO-ICMR NCD risk factor surveillance study                                                                                           | National                    | rural                | 15-69                                 | 15-69  | 6,432       | 6,842   |      |
| 354 | India     | 2005-2006  | Diet and Nutritional status of Rural population and Prevalnce of Hypertension                                                         | National                    | rural                | 20+                                   | 20+    | 11,920      | 13,702  |      |
| 355 | India     | 2005-2007  | Prevalence of cardiovascular risk factors in rural Tamil Nadu                                                                         | Community                   | rural                | 25-64                                 | 25-64  | 4,900       | 5,563   |      |
| 356 | India     | 2006       | Ramachandran et al., Diabetes Care 31:893-8, 2008                                                                                     | Community                   | both                 | 20+                                   | 20+    | 3,321       | 3,745   |      |
| 357 | India     | 2006-2008  | Central India Eye and Medical Study                                                                                                   | Community                   | rural                | 30+                                   | 30+    | 2,191       | 2,518   |      |
| 358 | India     | 2007-2008  | SAGE                                                                                                                                  | National                    | both                 | 50+                                   | 50+    | 3,257       | 3,201   |      |
| 359 | India     | 2007-2009  | Prevalence of NCD risk factor in people above 15 year in Rural area Nagpur using WHO STEP approach                                    | Community                   | rural                | 15+                                   | 15+    | 1,971       | 1,811   |      |
| 360 | India     | 2008-2010  | ICMR India Diabetes Study                                                                                                             | National                    | both                 | 20+                                   | 20+    | 6,953       | 7,025   |      |
| 361 | India     | 2011-2012  | Diet and Nutritional status of Rural population and Prevalnce of Hypertension                                                         | National                    | rural                | 18+                                   | 18+    | 22,075      | 27,244  |      |
| 362 | India     | 2012-2014  | District Level Household and Facility Survey (DLHS) 4                                                                                 | National                    | both                 | 18+                                   | 18+    | 402,994     | 476,021 |      |
| 363 | India     | 2014       | Annual Health Survey-Chemical, Anthropometric                                                                                         | National                    | both                 | 18+                                   | 18+    | 442,040     | 479,130 |      |
| 364 | India     | 2015-2016  | Diet and nutritional status of urban population and prevalence of hypertension                                                        | National                    | urban                | 18+                                   | 18+    | 39,511      | 54,601  |      |
| 365 | Indonesia | 1997-1998  | Indonesian Family Life Surveys                                                                                                        | National                    | both                 | 15+                                   | 15+    | 8,714       | 10,543  |      |
| 366 | Indonesia | 2000-2001  | Indonesian Family Life Surveys                                                                                                        | National                    | both                 | 15+                                   | 15+    | 11,820      | 12,745  |      |
| 367 | Indonesia | 2007-2008  | Indonesian Family Life Surveys                                                                                                        | National                    | both                 | 15+                                   | 15+    | 13,864      | 15,359  |      |
| 368 | Indonesia | 2014-2015  | Indonesian Family Life Surveys                                                                                                        | National                    | both                 | 15+                                   | 15+    | 15,284      | 16,779  |      |
| 369 | Iran      | 1990-1991  | National Health Survey I                                                                                                              | National                    | both                 | 10+                                   | 10+    | 11,849      | 15,427  |      |
| 370 | Iran      | 1998       | Isfahan Salt Study (ISS)                                                                                                              | Community                   | both                 | 20-60                                 | 20-60  | 421         | 601     |      |
| 371 | Iran      | 1999-2000  | National Health Survey II                                                                                                             | National                    | both                 | 10+                                   | 10+    | 18,142      | 21,600  |      |
| 372 | Iran      | 1999-2001  | Tehran Lipid and Glucose Study                                                                                                        | Community                   | both                 | 5+                                    | 5+     | 8,100       | 8,400   |      |
| 373 | Iran      | 2001       | Isfahan Healthy Heart Program, Najaf Abad rural                                                                                       | Community                   | rural                | 19+                                   | 19+    | 408         | 419     |      |
| 374 | Iran      | 2001       | Isfahan Salt Study (ISS)                                                                                                              | Community                   | both                 | 20-60                                 | 20-60  | 166         | 181     |      |
| 375 | Iran      | 2001       | Isfahan Healthy Heart Program, Najaf Abad urban                                                                                       | Community                   | urban                | 19+                                   | 19+    | 580         | 576     |      |
| 376 | Iran      | 2001       | Isfahan Healthy Heart Program, Arak urban                                                                                             | Community                   | urban                | 19+                                   | 19+    | 2,085       | 2,127   |      |
| 377 | Iran      | 2001       | Isfahan Healthy Heart Program, Isfahan urban                                                                                          | Community                   | urban                | 19+                                   | 19+    | 1,776       | 1,926   |      |
| 378 | Iran      | 2001       | Isfahan Healthy Heart Program, Isfahan rural                                                                                          | Community                   | rural                | 19+                                   | 19+    | 234         | 239     |      |
| 379 | Iran      | 2001       | Isfahan Healthy Heart Program, Arak rural                                                                                             | Community                   | rural                | 19+                                   | 19+    | 1,028       | 1,090   |      |
| 380 | Iran      | 2002-2005  | Tehran Lipid and Glucose Study                                                                                                        | Community                   | both                 | 5+                                    | 5+     | 2,782       | 3,560   |      |
| 381 | Iran      | 2003-2004  | The Persian Gulf Healthy Heart Study                                                                                                  | Subnational                 | urban                | 25-75                                 | 25-75  | 1,740       | 1,976   |      |
| 382 | Iran      | 2005       | Provincial Non-Communicable Disease Surveillance Survey 2005                                                                          | National                    | both                 | 15-64                                 | 15-64  | 40,853      | 39,823  |      |
| 383 | Iran      | 2004-2008  | Golestan Cohort Study Main Phase                                                                                                      | Subnational                 | rural                | 40-75                                 | 40-75  | 17,283      | 22,684  | 3    |
| 384 | Iran      | 2004-2008  | Golestan Cohort Study Main Phase                                                                                                      | Community                   | urban                | 40-75                                 | 40-75  | 3,934       | 6,098   | 3    |
| 385 | Iran      | 2006       | Provincial Non-Communicable Disease Surveillance Survey 2006                                                                          | National                    | both                 | 16-65                                 | 16-65  | 14,934      | 14,636  |      |
| 386 | Iran      | 2005-2008  | Tehran Lipid and Glucose Study                                                                                                        | Community                   | both                 | 5+                                    | 5+     | 3,060       | 3,808   |      |
| 387 | Iran      | 2007       | Isfahan Healthy Heart Program, Isfahan rural                                                                                          | Community                   | rural                | 19+                                   | 19+    | 157         | 152     |      |
| 388 | Iran      | 2007       | Isfahan Healthy Heart Program, Arak rural                                                                                             | Community                   | rural                | 19+                                   | 19+    | 1,030       | 1,028   |      |
| 389 | Iran      | 2007       | Isfahan Healthy Heart Program, Arak urban                                                                                             | Community                   | urban                | 19+                                   | 19+    | 1,429       | 1,366   |      |
| 390 | Iran      | 2007       | Isfahan Healthy Heart Program, Najaf Abad urban                                                                                       | Community                   | urban                | 19+                                   | 19+    | 495         | 544     |      |
| 391 | Iran      | 2007       | Isfahan Healthy Heart Program, Najaf Abad rural                                                                                       | Community                   | rural                | 19+                                   | 19+    | 255         | 254     |      |
| 392 | Iran      | 2007       | National Non-Communicable Disease Surveillance Survey 2007                                                                            | National                    | both                 | 15-64                                 | 15-64  | 2,594       | 2,528   |      |
| 393 | Iran      | 2007       | Isfahan Healthy Heart Program, Isfahan urban                                                                                          | Community                   | urban                | 19+                                   | 19+    | 1,340       | 1,339   |      |
| 394 | Iran      | 2007       | Isfahan Salt Study (ISS)                                                                                                              | Community                   | both                 | 19-60                                 | 19-60  | 336         | 437     |      |
| 395 | Iran      | 2007       | Provincial Non-Communicable Disease Surveillance Survey 2007                                                                          | National                    | both                 | 15-64                                 | 15-64  | 14,886      | 14,572  |      |
| 396 | Iran      | 2008       | Provincial Non-Communicable Disease Surveillance Survey 2008                                                                          | National                    | both                 | 15-64                                 | 15-64  | 14,845      | 14,431  |      |

|     | Country | Data years | Survey/Study name/Citation                                               | Level of representativeness | Rural, urban or both | Age range as in the NCD-RisC database |        | Sample size |        | Note |
|-----|---------|------------|--------------------------------------------------------------------------|-----------------------------|----------------------|---------------------------------------|--------|-------------|--------|------|
|     |         |            |                                                                          |                             |                      | Male                                  | Female | Male        | Female |      |
| 397 | Iran    | 2008-2009  | Zahedan city study                                                       | Community                   | urban                | 10+                                   | 10+    | 1,379       | 1,204  |      |
| 398 | Iran    | 2008-2010  | Amol county study                                                        | Community                   | both                 | 10+                                   | 10+    | 3,488       | 2,651  |      |
| 399 | Iran    | 2008-2010  | Tehran city study                                                        | Community                   | urban                | 10+                                   | 10+    | 426         | 557    |      |
| 400 | Iran    | 2009       | Provincial Non-Communicable Disease Surveillance Survey 2009             | National                    | both                 | 15-64                                 | 15-64  | 14,903      | 14,545 |      |
| 401 | Iran    | 2008-2011  | Tehran Lipid and Glucose Study                                           | Community                   | urban                | 20+                                   | 20+    | 4,713       | 6,024  |      |
| 402 | Iran    | 2009-2010  | The Persian Gulf Healthy Heart Study                                     | Subnational                 | urban                | 31-79                                 | 31-79  | 835         | 1,016  |      |
| 403 | Iran    | 2010-2012  | Golestan Cohort Study Second Phase                                       | Subnational                 | rural                | 43-82                                 | 43-82  | 4,325       | 4,920  | 3    |
| 404 | Iran    | 2010-2012  | Golestan Cohort Study Second Phase                                       | Community                   | urban                | 43-82                                 | 43-82  | 1,089       | 1,062  | 3    |
| 405 | Iran    | 2011       | Provincial Non-Communicable Disease Surveillance Survey 2011             | National                    | both                 | 10-69                                 | 10-69  | 4,722       | 6,387  |      |
| 406 | Iran    | 2013-2014  | Isfahan Salt Study (ISS)                                                 | Community                   | both                 | 10-60                                 | 10-60  | 649         | 715    |      |
| 407 | Iran    | 2013-2014  | Bushehr Elderly Health Program (BEH)                                     | Community                   | urban                | 60+                                   | 60+    | 1,455       | 1,544  |      |
| 408 | Iraq    | 2015       | STEPS                                                                    | National                    | both                 | 18+                                   | 18+    | 1,593       | 2,326  |      |
| 409 | Ireland | 1998       | Survey of Lifestye, Attitudes and Nutritional in Ireland 1998            | National                    | both                 | 18+                                   | 18+    | 125         | 296    |      |
| 410 | Ireland | 2002       | Survey of Lifestye, Attitudes and Nutritional in Ireland 2002            | National                    | both                 | 18+                                   | 18+    | 169         | 221    |      |
| 411 | Ireland | 2006-2007  | Survey of Lifestye, Attitudes and Nutritional in Ireland 2006-2007       | National                    | both                 | 45+                                   | 45+    | 526         | 679    |      |
| 412 | Ireland | 2008-2010  | National Adult Nutrition Survey                                          | National                    | both                 | 18+                                   | 18+    | 644         | 671    |      |
| 413 | Ireland | 2009-2011  | The Irish Longitudinal Study on Ageing                                   | National                    | both                 | 50+                                   | 50+    | 2,696       | 3,173  |      |
| 414 | Israel  | 1999-2005  | The Israel Glucose Intolerance, Obesity and Hypertention Study           | National                    | urban                | 58+                                   | 58+    | 513         | 505    |      |
| 415 | Israel  | 2002-2007  | Hadera District Study                                                    | Subnational                 | urban                | 25-78                                 | 25-78  | 388         | 377    |      |
| 416 | Israel  | 2005-2006  | Mabat Zahav National Health and Nutrition Survey ages 65 and over 2005-6 | National                    | urban                | 65+                                   | 65+    | 793         | 890    |      |
| 417 | Italy   | 1985       | INTERSALT, Naples                                                        | Community                   | urban                | 20-59                                 | 20-59  | 100         | 100    |      |
| 418 | Italy   | 1985       | Finland, Italy, Netherlands, Elderly (Fine-Italy)                        | Community                   | rural                | 65-84                                 |        | 680         |        |      |
| 419 | Italy   | 1986       | INTERSALT, Gubbio                                                        | Community                   | urban                | 20-59                                 | 20-59  | 99          | 100    |      |
| 420 | Italy   | 1986       | INTERSALT, Bassiano                                                      | Community                   | urban                | 20-59                                 | 20-59  | 99          | 100    |      |
| 421 | Italy   | 1986       | INTERSALT, Mirano                                                        | Community                   | urban                | 20-59                                 | 20-59  | 100         | 100    |      |
| 422 | Italy   | 1986       | MONICA, Friuli                                                           | Subnational                 | urban                | 25-64                                 | 25-64  | 925         | 919    |      |
| 423 | Italy   | 1986-1987  | MONICA, Brianza                                                          | Subnational                 | urban                | 25-64                                 | 25-64  | 809         | 830    |      |
| 424 | Italy   | 1989       | MONICA, Friuli                                                           | Subnational                 | urban                | 25-64                                 | 25-64  | 906         | 906    |      |
| 425 | Italy   | 1989       | Ventimiglia Heart Study                                                  | Community                   | rural                | 10+                                   | 10+    | 578         | 690    |      |
| 426 | Italy   | 1983-1996  | Malattie cardiovascolari ATerosclerotiche Istituto Superiore di Sanità   | Community                   | rural                | 18-77                                 | 18-77  | 3,968       | 4,519  |      |
| 427 | Italy   | 1989-1990  | MONICA, Brianza                                                          | Subnational                 | urban                | 25-64                                 | 25-64  | 764         | 762    |      |
| 428 | Italy   | 1990       | Bruneck Study                                                            | Community                   | rural                | 40-79                                 | 40-79  | 469         | 450    |      |
| 429 | Italy   | 1992-1993  | Italian Longitudinal Study on Aging                                      | National                    | both                 | 65-84                                 | 65-84  | 1,828       | 1,669  |      |
| 430 | Italy   | 1993-1994  | MONICA, Brianza                                                          | Subnational                 | urban                | 25-64                                 | 25-64  | 796         | 848    |      |
| 431 | Italy   | 1994       | MONICA, Friuli                                                           | Subnational                 | urban                | 25-64                                 | 25-64  | 883         | 888    |      |
| 432 | Italy   | 1995       | Bruneck Study                                                            | Community                   | rural                | 45-84                                 | 45-84  | 414         | 412    |      |
| 433 | Italy   | 1993-1998  | EPIC Florence                                                            | Community                   | urban                | 24-72                                 | 24-72  | 3,327       | 9,486  |      |
| 434 | Italy   | 1995-1996  | Italian Longitudinal Study on Aging                                      | National                    | both                 | 69-90                                 | 69-90  | 1,091       | 972    |      |
| 435 | Italy   | 1995-1999  | PROgetto Veneto Anziani                                                  | Subnational                 | both                 | 65+                                   | 65+    | 1,243       | 1,851  |      |
| 436 | Italy   | 1998-1999  | progetto VIP                                                             | Community                   | both                 | 25-74                                 | 25-74  | 598         | 599    |      |
| 437 | Italy   | 1998-2002  | Osservatorio Epidemiologico Cardiovascolare                              | National                    | both                 | 35-74                                 | 35-74  | 4,878       | 4,772  |      |
| 438 | Italy   | 2000       | Bruneck Study                                                            | Community                   | rural                | 50-89                                 | 50-89  | 331         | 361    |      |
| 439 | Italy   | 2000-2003  | PROgetto Veneto Anziani                                                  | Subnational                 | both                 | 67+                                   | 67+    | 804         | 1,363  |      |
| 440 | Italy   | 2001-2003  | The Study of Asti                                                        | Community                   | both                 | 45-64                                 | 45-64  | 780         | 878    |      |
| 441 | Italy   | 2003       | The European Male Ageing Study                                           | Community                   | both                 | 40+                                   |        | 433         |        |      |
| 442 | Italy   | 2002-2005  | PROgetto Veneto Anziani                                                  | Subnational                 | both                 | 68+                                   | 68+    | 626         | 1,147  |      |
| 443 | Italy   | 2004-2005  | Italian Project on the Epidemiology of Alzheimer's disease               | National                    | both                 | 65-84                                 | 65-84  | 1,578       | 1,440  |      |
| 444 | Italy   | 2004-2005  | Vobarno study                                                            | Community                   | rural                | 55-74                                 | 55-74  | 99          | 113    |      |
| 445 | Italy   | 2005       | Bruneck Study                                                            | Community                   | rural                | 55-93                                 | 55-93  | 264         | 307    |      |
| 446 | Italy   | 2005-2007  | Moli-family Study                                                        | Subnational                 | both                 | 14-35                                 | 14-35  | 129         | 158    |      |
| 447 | Italy   | 2005-2010  | Moli-sani Study                                                          | Subnational                 | both                 | 35+                                   | 35+    | 11,699      | 12,617 |      |

|     | Country | Data years | Survey/Study name/Citation                                                         | Level of representativeness | Rural, urban or both | Age range as in the NCD-RisC database |        | Sample size |           | Note |
|-----|---------|------------|------------------------------------------------------------------------------------|-----------------------------|----------------------|---------------------------------------|--------|-------------|-----------|------|
|     |         |            |                                                                                    |                             |                      | Male                                  | Female | Male        | Female    |      |
| 448 | Italy   | 2008       | The European Male Ageing Study                                                     | Community                   | both                 | 40+                                   |        | 352         |           |      |
| 449 | Italy   | 2008-2009  | progetto VIP                                                                       | Community                   | both                 | 25-74                                 | 25-74  | 600         | 598       |      |
| 450 | Italy   | 2008-2012  | Osservatorio Epidemiologico Cardiovascolare/Health Examination Survey              | National                    | both                 | 35-80                                 | 35-80  | 4,370       | 4,337     |      |
| 451 | Italy   | 2010       | Bruneck Study                                                                      | Community                   | rural                | 60-98                                 | 60-98  | 224         | 256       |      |
| 452 | Italy   | 2010-2012  | CArdiovascular risk MEtabolic syndrome LIver and Autoimmunity diseases (CA.ME.LIA) | Community                   | both                 | 18-75                                 | 18-75  | 477         | 515       |      |
| 453 | Italy   | 2011-2012  | Vobarno study                                                                      | Community                   | rural                | 49-62                                 | 49-62  | 104         | 143       |      |
| 454 | Italy   | 2014-2016  | Mediterranean healthy Eating, Aging and Lifestyles (MEAL) study                    | Subnational                 | urban                | 20+                                   | 20+    | 750         | 1,117     |      |
| 455 | Italy   | 2015       | Bruneck Study                                                                      | Community                   | rural                | 65-98                                 | 65-98  | 171         | 169       |      |
| 456 | Jamaica | 2000-2001  | Jamaica Health and Lifestyle Survey                                                | National                    | both                 | 15-74                                 | 15-74  | 656         | 1,291     |      |
| 457 | Jamaica | 2007-2008  | Jamaica Health and Lifestyle Survey                                                | National                    | both                 | 15-74                                 | 15-74  | 869         | 1,926     |      |
| 458 | Japan   | 1985       | INTERSALT, Osaka                                                                   | Community                   | urban                | 20-59                                 | 20-59  | 100         | 97        |      |
| 459 | Japan   | 1985       | National Nutrition Survey                                                          | National                    | both                 | 15+                                   | 15+    | 5,364       | 7,154     |      |
| 460 | Japan   | 1985       | INTERSALT, Toyama                                                                  | Community                   | urban                | 20-59                                 | 20-59  | 100         | 100       |      |
| 461 | Japan   | 1985       | INTERSALT, Tochigi                                                                 | Community                   | urban                | 20-59                                 | 20-59  | 95          | 99        |      |
| 462 | Japan   | 1985-1986  | Akabane Study                                                                      | Community                   | urban                | 40-69                                 | 40-69  | 813         | 1,023     |      |
| 463 | Japan   | 1986       | National Nutrition Survey                                                          | National                    | both                 | 15+                                   | 15+    | 5,471       | 7,050     |      |
| 464 | Japan   | 1987       | Konan Town Study                                                                   | Community                   | rural                | 20-79                                 | 20-79  | 70          | 89        |      |
| 465 | Japan   | 1987       | National Nutrition Survey                                                          | National                    | both                 | 15+                                   | 15+    | 4,485       | 6,485     |      |
| 466 | Japan   | 1988       | National Nutrition Survey                                                          | National                    | both                 | 15+                                   | 15+    | 4,528       | 6,254     |      |
| 467 | Japan   | 1988-1990  | Miyama Cohort Study                                                                | Community                   | rural                | 40-80                                 | 40-80  | 477         | 601       |      |
| 468 | Japan   | 1989       | National Nutrition Survey                                                          | National                    | both                 | 15+                                   | 15+    | 4,066       | 5,548     |      |
| 469 | Japan   | 1990       | National Nutrition Survey                                                          | National                    | both                 | 15+                                   | 15+    | 4,448       | 5,988     |      |
| 470 | Japan   | 1991       | Shigaraki Town Study                                                               | Community                   | rural                | 30-89                                 | 30-89  | 234         | 330       |      |
| 471 | Japan   | 1991       | Konan Town Study                                                                   | Community                   | rural                | 20-79                                 | 20-79  | 93          | 117       |      |
| 472 | Japan   | 1991       | National Nutrition Survey                                                          | National                    | both                 | 15+                                   | 15+    | 4,237       | 5,706     |      |
| 473 | Japan   | 1992       | Shigaraki Town Study                                                               | Community                   | rural                | 30-89                                 | 30-89  | 288         | 387       |      |
| 474 | Japan   | 1992       | National Nutrition Survey                                                          | National                    | both                 | 15+                                   | 15+    | 3,879       | 5,307     |      |
| 475 | Japan   | 1993       | Shigaraki Town Study                                                               | Community                   | rural                | 30-89                                 | 30-89  | 301         | 454       |      |
| 476 | Japan   | 1993       | National Nutrition Survey                                                          | National                    | both                 | 15+                                   | 15+    | 3,492       | 4,921     |      |
| 477 | Japan   | 1994       | National Nutrition Survey                                                          | National                    | both                 | 15+                                   | 15+    | 3,342       | 4,783     |      |
| 478 | Japan   | 1994       | Shigaraki Town Study                                                               | Community                   | rural                | 30-89                                 | 30-89  | 252         | 336       |      |
| 479 | Japan   | 1995       | National Nutrition Survey                                                          | National                    | both                 | 15+                                   | 15+    | 3,269       | 4,654     |      |
| 480 | Japan   | 1995       | Shigaraki Town Study                                                               | Community                   | rural                | 30-89                                 | 30-89  | 300         | 470       |      |
| 481 | Japan   | 1996       | National Nutrition Survey                                                          | National                    | both                 | 15+                                   | 15+    | 3,152       | 4,476     |      |
| 482 | Japan   | 1996       | Shigaraki Town Study                                                               | Community                   | rural                | 30-89                                 | 30-89  | 86          | 152       |      |
| 483 | Japan   | 1996-1997  | INTERMAP, AitoTown                                                                 | Community                   | both                 | 40-59                                 | 40-59  | 130         | 129       |      |
| 484 | Japan   | 1997       | National Nutrition Survey                                                          | National                    | both                 | 15+                                   | 15+    | 3,069       | 4,386     |      |
| 485 | Japan   | 1997       | Shigaraki Town Study                                                               | Community                   | rural                | 30-89                                 | 30-89  | 61          | 100       |      |
| 486 | Japan   | 1997-1998  | INTERMAP, Wakayama                                                                 | Community                   | urban                | 40-59                                 | 40-59  | 146         | 144       |      |
| 487 | Japan   | 1997-1998  | INTERMAP, Toyama                                                                   | Community                   | urban                | 40-59                                 | 40-59  | 149         | 150       |      |
| 488 | Japan   | 1997-1998  | INTERMAP, Sapporo                                                                  | Community                   | urban                | 40-59                                 | 40-59  | 149         | 148       |      |
| 489 | Japan   | 1998       | National Nutrition Survey                                                          | National                    | both                 | 15+                                   | 15+    | 3,281       | 4,681     |      |
| 490 | Japan   | 1999       | National Nutrition Survey                                                          | National                    | both                 | 15+                                   | 15+    | 2,550       | 3,814     |      |
| 491 | Japan   | 2000       | National Nutrition Survey                                                          | National                    | both                 | 15+                                   | 15+    | 2,690       | 3,788     |      |
| 492 | Japan   | 2001       | National Nutrition Survey                                                          | National                    | both                 | 15+                                   | 15+    | 2,465       | 3,754     |      |
| 493 | Japan   | 2001       | The Japan Association of Health Service Database                                   | Subnational                 | both                 | 20+                                   | 20+    | 1,318,133   | 1,061,237 |      |
| 494 | Japan   | 2002       | National Nutrition Survey                                                          | National                    | both                 | 15+                                   | 15+    | 2,394       | 3,473     |      |
| 495 | Japan   | 2002-2003  | The Hisayama Study                                                                 | Community                   | rural                | 40+                                   | 40+    | 1,414       | 1,883     |      |
| 496 | Japan   | 2003       | National Health and Nutrition Survey                                               | National                    | both                 | 15+                                   | 15+    | 2,350       | 3,491     |      |
| 497 | Japan   | 2004       | National Health and Nutrition Survey                                               | National                    | both                 | 15+                                   | 15+    | 1,743       | 2,590     |      |
| 498 | Japan   | 2005       | National Health and Nutrition Survey                                               | National                    | both                 | 15+                                   | 15+    | 1,723       | 2,496     |      |



|     | Country    | Data years | Survey/Study name/Citation                                                           | Level of representativeness | Rural, urban or both | Age range as in the NCD-RisC database |        | Sample size |        | Note |
|-----|------------|------------|--------------------------------------------------------------------------------------|-----------------------------|----------------------|---------------------------------------|--------|-------------|--------|------|
|     |            |            |                                                                                      |                             |                      | Male                                  | Female | Male        | Female |      |
| 499 | Japan      | 2006       | National Health and Nutrition Survey                                                 | National                    | both                 | 15+                                   | 15+    | 1,925       | 2,787  |      |
| 500 | Japan      | 2007       | National Health and Nutrition Survey                                                 | National                    | both                 | 15+                                   | 15+    | 1,810       | 2,634  |      |
| 501 | Japan      | 2008       | National Health and Nutrition Survey                                                 | National                    | both                 | 15+                                   | 15+    | 1,981       | 2,822  |      |
| 502 | Japan      | 2009       | National Health and Nutrition Survey                                                 | National                    | both                 | 15+                                   | 15+    | 1,887       | 2,726  |      |
| 503 | Japan      | 2010       | National Health and Nutrition Survey                                                 | National                    | both                 | 15+                                   | 15+    | 1,758       | 2,470  |      |
| 504 | Japan      | 2011       | National Health and Nutrition Survey                                                 | National                    | both                 | 15+                                   | 15+    | 1,652       | 2,326  |      |
| 505 | Japan      | 2011       | The Tokyo Health Service Association Database                                        | Community                   | urban                | 20+                                   | 20+    | 82,375      | 53,738 |      |
| 506 | Japan      | 2012       | National Health and Nutrition Survey                                                 | National                    | both                 | 15+                                   | 15+    | 6,163       | 8,875  |      |
| 507 | Japan      | 2013       | National Health and Nutrition Survey                                                 | National                    | both                 | 15+                                   | 15+    | 1,487       | 2,061  |      |
| 508 | Japan      | 2014       | National Health and Nutrition Survey                                                 | National                    | both                 | 15+                                   | 15+    | 1,555       | 2,141  |      |
| 509 | Japan      | 2014-2015  | Nagaoka Health Screening                                                             | Community                   | both                 | 20-89                                 | 20-89  | 4,938       | 4,298  |      |
| 510 | Japan      | 2015       | National Health and Nutrition Survey                                                 | National                    | both                 | 15+                                   | 15+    | 1,433       | 2,091  |      |
| 511 | Jordan     | 2004       | Behavioural Risk Factor Surveillance Survey                                          | National                    | both                 | 18+                                   | 18+    | 237         | 474    |      |
| 512 | Jordan     | 2007       | Behavioural Risk Factor Surveillance Survey                                          | National                    | both                 | 18+                                   | 18+    | 332         | 433    |      |
| 513 | Jordan     | 2009       | Metabolic abnormalities and vitamin D study                                          | National                    | both                 | 10+                                   | 10+    | 1,496       | 3,727  |      |
| 514 | Jordan     | 2016-2017  | National Cardiovascular Diseases and Diabetes Study (NCDDS)                          | National                    | both                 | 18+                                   | 18+    | 1,186       | 2,731  |      |
| 515 | Kazakhstan | 2015       | Shymkent STEPS                                                                       | Subnational                 | both                 | 18-69                                 | 18-69  | 362         | 701    |      |
| 516 | Kazakhstan | 2015       | Almaty STEPS                                                                         | Subnational                 | both                 | 18-69                                 | 18-69  | 384         | 1,145  |      |
| 517 | Kazakhstan | 2015-2016  | Aktobe STEPS                                                                         | Subnational                 | both                 | 18-69                                 | 18-69  | 346         | 1,156  |      |
| 518 | Kenya      | 2015       | STEPS                                                                                | National                    | both                 | 18-69                                 | 18-69  | 1,761       | 2,526  |      |
| 519 | Kiribati   | 2004       | STEPS                                                                                | National                    | both                 | 15-64                                 | 15-64  | 784         | 945    |      |
| 520 | Kuwait     | 2006       | STEPS                                                                                | National                    | both                 | 20-65                                 | 20-65  | 918         | 1,297  |      |
| 521 | Kuwait     | 2008-2010  | Gulf Cooperation Council World Health Survey                                         | National                    | both                 | 18+                                   | 18+    | 1,624       | 1,851  |      |
| 522 | Kuwait     | 2014       | STEPS                                                                                | National                    | both                 | 18-69                                 | 18-69  | 1,380       | 2,216  |      |
| 523 | Kyrgyzstan | 2012       | Demographic and Health Survey Kyrgyzstan 2012                                        | National                    | both                 | 15-49                                 | 15-49  | 2,412       | 7,604  |      |
| 524 | Kyrgyzstan | 2013       | STEPS                                                                                | National                    | both                 | 25-64                                 | 25-64  | 943         | 1,601  |      |
| 525 | Lao PDR    | 2008       | STEPS                                                                                | Community                   | urban                | 25-64                                 | 25-64  | 1,668       | 2,455  |      |
| 526 | Lao PDR    | 2013       | STEPS                                                                                | National                    | both                 | 18-64                                 | 18-64  | 988         | 1,469  |      |
| 527 | Lebanon    | 2008-2009  | STEPS                                                                                | National                    | both                 | 18+                                   | 18+    | 1,319       | 1,480  |      |
| 528 | Lesotho    | 2009-2010  | Demographic and Health Survey Lesotho 2009-2010                                      | National                    | both                 | 15-59                                 | 15-49  | 3,166       | 3,732  |      |
| 529 | Lesotho    | 2012       | STEPS                                                                                | National                    | both                 | 25-64                                 | 25-64  | 743         | 1,457  |      |
| 530 | Lesotho    | 2014       | Demographic and Health Survey Lesotho 2014                                           | National                    | both                 | 15-59                                 | 15-49  | 2,796       | 3,165  |      |
| 531 | Liberia    | 2011       | STEPS                                                                                | National                    | both                 | 25-64                                 | 25-64  | 1,017       | 1,270  |      |
| 532 | Libya      | 2009       | STEPS                                                                                | National                    | both                 | 25-64                                 | 25-64  | 1,684       | 1,569  |      |
| 533 | Lithuania  | 1986-1987  | MONICA, Kaunas                                                                       | Community                   | urban                | 35-64                                 | 35-64  | 894         | 868    |      |
| 534 | Lithuania  | 1987       | Countrywide Integrated Noncommunicable Diseases Intervention Programme survey        | Subnational                 | rural                | 25-64                                 | 25-64  | 1,227       | 1,445  |      |
| 535 | Lithuania  | 1992-1993  | MONICA, Kaunas                                                                       | Community                   | urban                | 35-64                                 | 35-64  | 611         | 628    |      |
| 536 | Lithuania  | 1992-1993  | Countrywide Integrated Noncommunicable Diseases Intervention Programme survey        | Subnational                 | rural                | 25-64                                 | 25-64  | 677         | 864    |      |
| 537 | Lithuania  | 1998-1999  | Countrywide Integrated Noncommunicable Diseases Intervention Programme survey        | Subnational                 | rural                | 25-64                                 | 25-64  | 816         | 1,018  |      |
| 538 | Lithuania  | 2001-2002  | MONICA4                                                                              | Community                   | urban                | 35-64                                 | 35-64  | 626         | 775    |      |
| 539 | Lithuania  | 2006-2007  | Countrywide Integrated Noncommunicable Diseases Intervention Programme survey        | Subnational                 | rural                | 25-64                                 | 25-64  | 731         | 982    |      |
| 540 | Lithuania  | 2006-2008  | Health, Alcohol and Psychosocial factors In Eastern Europe                           | Community                   | urban                | 45-75                                 | 45-75  | 3,220       | 3,863  |      |
| 541 | Luxembourg | 2007-2009  | Observation des Risques et de la Santé Cardio-Vasculaire au Luxembourg (ORISCAV-LUX) | National                    | both                 | 18-69                                 | 18-69  | 696         | 734    |      |
| 542 | Madagascar | 2005       | STEPS                                                                                | Community                   | urban                | 25-64                                 | 25-64  | 2,745       | 2,682  |      |
| 543 | Malawi     | 2009       | STEPS                                                                                | National                    | both                 | 25-64                                 | 25-64  | 1,183       | 2,527  |      |
| 544 | Malaysia   | 1996       | National Health and Morbidity Survey (NHMS)                                          | National                    | both                 | 18+                                   | 18+    | 10,123      | 11,532 |      |
| 545 | Malaysia   | 2004       | Rampal et al., Public Health 2008; 122: 11-8                                         | National                    | both                 | 15+                                   | 15+    | 7,301       | 9,899  |      |
| 546 | Malaysia   | 2006       | National Health and Morbidity Survey (NHMS)                                          | National                    | both                 | 18+                                   | 18+    | 15,208      | 18,774 |      |
| 547 | Malaysia   | 2008       | Metabolic Syndrome Study in Malaysia                                                 | National                    | urban                | 18+                                   | 18+    | 769         | 1,449  |      |
| 548 | Malaysia   | 2008       | Metabolic Syndrome Study in Malaysia                                                 | National                    | rural                | 18+                                   | 18+    | 754         | 1,368  |      |
| 549 | Malaysia   | 2011       | National Health and Morbidity Survey (NHMS)                                          | National                    | both                 | 18+                                   | 18+    | 8,235       | 9,450  |      |

|     | Country                          | Data years | Survey/Study name/Citation                                                                                                 | Level of representativeness | Rural, urban or both | Age range as in the NCD-RisC database |        | Sample size |        | Note |
|-----|----------------------------------|------------|----------------------------------------------------------------------------------------------------------------------------|-----------------------------|----------------------|---------------------------------------|--------|-------------|--------|------|
|     |                                  |            |                                                                                                                            |                             |                      | Male                                  | Female | Male        | Female |      |
| 550 | Malaysia                         | 2015       | National Health and Morbidity Survey (NHMS)                                                                                | National                    | both                 | 18+                                   | 18+    | 9,067       | 10,100 |      |
| 551 | Maldives                         | 2011       | STEPS                                                                                                                      | National                    | both                 | 15-64                                 | 15-64  | 661         | 1,067  |      |
| 552 | Mali                             | 2007       | STEPS                                                                                                                      | Community                   | both                 | 15-64                                 | 15-64  | 1,060       | 1,539  |      |
| 553 | Malta                            | 1986       | INTERSALT                                                                                                                  | Community                   | rural                | 20-59                                 | 20-59  | 100         | 100    |      |
| 554 | Marshall Islands                 | 2002       | STEPS                                                                                                                      | National                    | both                 | 15-64                                 | 15-64  | 785         | 1,196  |      |
| 555 | Mauritius                        | 1987       | Mauritius non communicable disease survey                                                                                  | National                    | both                 | 25-74                                 | 25-74  | 2,351       | 2,659  |      |
| 556 | Mauritius                        | 1992       | Mauritius non communicable disease survey                                                                                  | National                    | both                 | 25-74                                 | 25-74  | 2,983       | 3,475  |      |
| 557 | Mauritius                        | 1998       | Mauritius non communicable disease survey                                                                                  | National                    | both                 | 25-74                                 | 25-74  | 2,560       | 3,243  |      |
| 558 | Mauritius                        | 2009       | Mauritius non communicable diseases survey                                                                                 | National                    | both                 | 19+                                   | 19+    | 2,901       | 3,430  |      |
| 559 | Mexico                           | 1992-1993  | Encuesta Nacional de Enfermedades Crónicas                                                                                 | National                    | urban                | 20-69                                 | 20-69  | 6,115       | 8,351  |      |
| 560 | Mexico                           | 1999-2000  | The Survey on Health, Well-Being, and Aging in Latin America and the Caribbean                                             | Community                   | urban                | 60+                                   | 60+    | 423         | 645    | 2    |
| 561 | Mexico                           | 2000       | Encuesta Nacional de Salud                                                                                                 | National                    | both                 | 20+                                   | 20+    | 13,689      | 28,706 |      |
| 562 | Mexico                           | 2002       | Encuesta Nacional Sobre Niveles de vida de los Hogares                                                                     | National                    | both                 | 15+                                   | 15+    | 7,371       | 9,143  |      |
| 563 | Mexico                           | 2005       | Encuesta Nacional Sobre Niveles de vida de los Hogares                                                                     | National                    | both                 | 10+                                   | 10+    | 8,398       | 9,994  |      |
| 564 | Mexico                           | 2006       | Encuesta Nacional de Salud Y Nutricion                                                                                     | National                    | both                 | 20+                                   | 20+    | 13,358      | 20,008 |      |
| 565 | Mexico                           | 2006       | PREVENIMSS National Coverage Surveys                                                                                       | Subnational                 | both                 | 20+                                   | 20+    | 8,722       | 11,333 |      |
| 566 | Mexico                           | 2009-2010  | SAGE                                                                                                                       | National                    | both                 | 50+                                   | 50+    | 834         | 1,298  |      |
| 567 | Mexico                           | 2009-2012  | Encuesta Nacional Sobre Niveles de vida de los Hogares                                                                     | National                    | both                 | 15+                                   | 15+    | 9,886       | 11,905 |      |
| 568 | Mexico                           | 2011-2012  | Encuesta Nacional de Salud Y Nutricion                                                                                     | National                    | both                 | 20+                                   | 20+    | 4,635       | 6,716  |      |
| 569 | Mexico                           | 2012       | The Mexican Health and Aging Study                                                                                         | National                    | both                 | 50+                                   | 50+    | 803         | 1,126  |      |
| 570 | Mexico                           | 2016       | Encuesta Nacional de Salud Y Nutricion                                                                                     | National                    | both                 | 20+                                   | 20+    | 2,852       | 5,444  |      |
| 571 | Micronesia (Federated States of) | 2002       | STEPS                                                                                                                      | Subnational                 | both                 | 25-64                                 | 25-64  | 637         | 948    |      |
| 572 | Micronesia (Federated States of) | 2006       | STEPS                                                                                                                      | Subnational                 | both                 | 15-64                                 | 15-64  | 925         | 1,557  |      |
| 573 | Micronesia (Federated States of) | 2008       | STEPS                                                                                                                      | Subnational                 | both                 | 25-64                                 | 25-64  | 897         | 1,292  |      |
| 574 | Micronesia (Federated States of) | 2009       | STEPS                                                                                                                      | Subnational                 | both                 | 15-64                                 | 15-64  | 213         | 429    |      |
| 575 | Micronesia (Federated States of) | 2009       | STEPS                                                                                                                      | Subnational                 | both                 | 15-64                                 | 15-64  | 435         | 549    |      |
| 576 | Moldova                          | 2013       | STEPS                                                                                                                      | National                    | both                 | 18-69                                 | 18-69  | 1,729       | 2,809  |      |
| 577 | Mongolia                         | 2005       | STEPS                                                                                                                      | National                    | both                 | 15-64                                 | 15-64  | 1,664       | 1,713  |      |
| 578 | Mongolia                         | 2009       | STEPS                                                                                                                      | National                    | both                 | 15-64                                 | 15-64  | 2,212       | 3,117  |      |
| 579 | Mongolia                         | 2013       | STEPS                                                                                                                      | National                    | both                 | 15-64                                 | 15-64  | 2,711       | 3,168  |      |
| 580 | Mozambique                       | 2005       | STEPS                                                                                                                      | National                    | both                 | 25-64                                 | 25-64  | 1,280       | 1,687  |      |
| 581 | Mozambique                       | 2014-2015  | STEPS                                                                                                                      | National                    | both                 | 15-64                                 | 15-64  | 1,151       | 1,693  |      |
| 582 | Myanmar                          | 2003-2004  | STEPS                                                                                                                      | Subnational                 | both                 | 25-74                                 | 25-74  | 1,989       | 2,446  |      |
| 583 | Myanmar                          | 2009       | STEPS                                                                                                                      | National                    | both                 | 15-64                                 | 15-64  | 2,858       | 4,451  |      |
| 584 | Myanmar                          | 2013-2014  | Non-communicable Disease Risk Factor Survey                                                                                | Subnational                 | both                 | 25-74                                 | 25-74  | 745         | 740    |      |
| 585 | Namibia                          | 2005       | STEPS                                                                                                                      | National                    | both                 | 24-64                                 | 24-64  | 1,403       | 1,795  |      |
| 586 | Namibia                          | 2009       | Okambilimbili Survey                                                                                                       | Community                   | urban                | 12+                                   | 12+    | 973         | 1,189  |      |
| 587 | Namibia                          | 2013       | Demographic and Health Survey Namibia 2013                                                                                 | National                    | both                 | 15-64                                 | 15-64  | 1,539       | 2,042  |      |
| 588 | Nauru                            | 1987       | Trends in the prevalence and incidence of non-insulin-dependent diabetes mellitus and impaired glucose tolerance           | National                    | both                 | 20+                                   | 20+    | 553         | 666    |      |
| 589 | Nauru                            | 1994       | Trends in the prevalence and incidence of non-insulin-dependent diabetes mellitus and impaired glucose tolerance           | National                    | both                 | 25+                                   | 25+    | 648         | 726    |      |
| 590 | Nauru                            | 2004       | STEPS                                                                                                                      | National                    | both                 | 15-64                                 | 15-64  | 1,085       | 1,148  |      |
| 591 | Nauru                            | 2006       | STEPS                                                                                                                      | National                    | both                 | 16-65                                 | 16-65  | 257         | 238    |      |
| 592 | Nepal                            | 2005       | Noncommunicable Disease Risk Factors Survey; STEPS                                                                         | Subnational                 | both                 | 15-64                                 | 15-64  | 3,667       | 4,025  |      |
| 593 | Nepal                            | 2007-2008  | Noncommunicable Disease Risk Factors Survey; STEPS                                                                         | National                    | both                 | 15-64                                 | 15-64  | 1,905       | 2,372  |      |
| 594 | Nepal                            | 2006-2011  | Early detection and management of Kidney disease, Hypertension, Diabetes and Cardiovascular disease (KHDC Nepal), Damak    | Community                   | urban                | 18+                                   | 18+    | 1,095       | 1,577  |      |
| 595 | Nepal                            | 2006-2011  | Early detection and management of Kidney disease, Hypertension, Diabetes and Cardiovascular disease (KHDC Nepal), Dharan   | Community                   | urban                | 18+                                   | 18+    | 4,130       | 6,127  |      |
| 596 | Nepal                            | 2006-2011  | Early detection and management of Kidney disease, Hypertension, Diabetes and Cardiovascular disease (KHDC Nepal), Tarahara | Community                   | rural                | 18+                                   | 18+    | 1,176       | 2,351  |      |
| 597 | Nepal                            | 2013       | STEPS                                                                                                                      | National                    | both                 | 15-69                                 | 15-69  | 1,326       | 2,763  |      |

|     | Country                        | Data years | Survey/Study name/Citation                                            | Level of representativeness | Rural, urban or both | Age range as in the NCD-RisC database |        | Sample size |        | Note |
|-----|--------------------------------|------------|-----------------------------------------------------------------------|-----------------------------|----------------------|---------------------------------------|--------|-------------|--------|------|
|     |                                |            |                                                                       |                             |                      | Male                                  | Female | Male        | Female |      |
| 598 | Netherlands                    | 1985       | INTERSALT                                                             | Community                   | urban                | 20-59                                 | 20-59  | 100         | 99     |      |
| 599 | Netherlands                    | 1985       | Zutphen Elderly Study                                                 | Community                   | urban                | 65-85                                 |        | 886         |        |      |
| 600 | Netherlands                    | 1990       | Zutphen Elderly Study                                                 | Community                   | urban                | 69-90                                 |        | 554         |        |      |
| 601 | Netherlands                    | 1989-1993  | the Rotterdam Study, first subcohort                                  | Community                   | urban                | 55+                                   | 55+    | 2,797       | 4,212  |      |
| 602 | Netherlands                    | 1992-1993  | The Longitudinal Aging Study Amsterdam (LASA)                         | Subnational                 | both                 | 55-85                                 | 55-85  | 1,270       | 1,353  | 4    |
| 603 | Netherlands                    | 1993-1995  | the Rotterdam Study, first subcohort                                  | Community                   | urban                | 56+                                   | 56+    | 2,305       | 3,278  |      |
| 604 | Netherlands                    | 1993-1997  | EPIC Utrecht                                                          | Community                   | both                 |                                       | 49-70  |             | 16,991 |      |
| 605 | Netherlands                    | 1993-1997  | EPIC Bilthoven                                                        | Community                   | urban                | 20-59                                 | 20-59  | 9,662       | 11,653 |      |
| 606 | Netherlands                    | 1995-1996  | The Longitudinal Aging Study Amsterdam (LASA)                         | Subnational                 | both                 | 58-88                                 | 58-88  | 722         | 751    | 4    |
| 607 | Netherlands                    | 1997-1999  | the Rotterdam Study, first subcohort                                  | Community                   | urban                | 61+                                   | 61+    | 1,741       | 2,428  |      |
| 608 | Netherlands                    | 1998-1999  | The Longitudinal Aging Study Amsterdam (LASA)                         | Subnational                 | both                 | 61-91                                 | 61-91  | 616         | 741    | 4    |
| 609 | Netherlands                    | 1998-2001  | Regenboog Project                                                     | National                    | both                 | 12-89                                 | 12-89  | 2,713       | 2,636  |      |
| 610 | Netherlands                    | 2000-2001  | the Rotterdam Study, second subcohort                                 | Community                   | urban                | 55+                                   | 55+    | 1,212       | 1,472  |      |
| 611 | Netherlands                    | 2001-2002  | The Longitudinal Aging Study Amsterdam (LASA)                         | Subnational                 | both                 | 64-94                                 | 64-94  | 587         | 686    | 4    |
| 612 | Netherlands                    | 2001-2003  | Surinamese in the Netherlands: Study on Ethnicity and Health (SUNSET) | Community                   | urban                | 35-60                                 | 35-60  | 251         | 257    |      |
| 613 | Netherlands                    | 2002-2004  | the Rotterdam Study, first subcohort                                  | Community                   | urban                | 65+                                   | 65+    | 1,287       | 1,852  |      |
| 614 | Netherlands                    | 2004-2005  | the Rotterdam Study, second subcohort                                 | Community                   | urban                | 58+                                   | 58+    | 980         | 1,267  |      |
| 615 | Netherlands                    | 2005-2006  | The Longitudinal Aging Study Amsterdam (LASA)                         | Subnational                 | both                 | 57-97                                 | 57-97  | 806         | 976    | 4    |
| 616 | Netherlands                    | 2006-2008  | the Rotterdam Study, third subcohort                                  | Community                   | urban                | 45+                                   | 45+    | 1,574       | 2,068  |      |
| 617 | Netherlands                    | 2008-2009  | The Longitudinal Aging Study Amsterdam (LASA)                         | Subnational                 | both                 | 60-100                                | 60-100 | 663         | 813    | 4    |
| 618 | Netherlands                    | 2009-2010  | Measuring the Netherlands (NL de Maat)                                | Subnational                 | both                 | 30-70                                 | 30-70  | 1,779       | 2,019  |      |
| 619 | Netherlands                    | 2011-2012  | the Rotterdam Study, second subcohort                                 | Community                   | urban                | 65+                                   | 65+    | 720         | 913    |      |
| 620 | Netherlands                    | 2011-2012  | The Longitudinal Aging Study Amsterdam (LASA)                         | Subnational                 | both                 | 63-104                                | 63-104 | 541         | 660    | 4    |
| 621 | Netherlands                    | 2011-2015  | Healthy Life in an Urban Setting (HELIUS)                             | Community                   | urban                | 18-71                                 | 18-71  | 2,085       | 2,470  |      |
| 622 | Netherlands                    | 2012-2014  | the Rotterdam Study, third subcohort                                  | Community                   | urban                | 51+                                   | 51+    | 1,254       | 1,635  |      |
| 623 | New Zealand                    | 1993-1994  | MONICA, Auckland                                                      | Community                   | urban                | 35-64                                 | 35-64  | 745         | 726    |      |
| 624 | New Zealand                    | 2008-2009  | 2008/09 New Zealand Adult Nutrition Survey                            | National                    | both                 | 15+                                   | 15+    | 1,949       | 2,396  |      |
| 625 | New Zealand                    | 2012-2013  | 2012/13 New Zealand Health Survey                                     | National                    | both                 | 15+                                   | 15+    | 4,952       | 6,692  |      |
| 626 | Nicaragua                      | 2003-2004  | CAMDI                                                                 | Community                   | urban                | 20+                                   | 20+    | 774         | 916    |      |
| 627 | Niger                          | 2007       | STEPS                                                                 | National                    | both                 | 15-64                                 | 15-64  | 1,447       | 1,225  |      |
| 628 | Nigeria                        | 2007       | Ibadan Study of Ageing                                                | Subnational                 | both                 | 60+                                   | 60+    | 670         | 928    |      |
| 629 | Nigeria                        | 2008       | Ibadan Study of Ageing                                                | Subnational                 | both                 | 61+                                   | 61+    | 479         | 662    |      |
| 630 | Nigeria                        | 2009       | Community Health Plan - Kwara Central Survey                          | Community                   | rural                | 12+                                   | 12+    | 1,642       | 1,777  |      |
| 631 | Nigeria                        | 2009       | Ibadan Study of Ageing                                                | Subnational                 | both                 | 62+                                   | 62+    | 450         | 616    |      |
| 632 | Nigeria                        | 2011       | Community Health Plan - Kwara Central Survey                          | Community                   | rural                | 12+                                   | 12+    | 591         | 636    |      |
| 633 | Nigeria                        | 2013       | Community Health Plan - Kwara Central Survey                          | Community                   | rural                | 12+                                   | 12+    | 530         | 583    |      |
| 634 | Norway                         | 1984-1986  | HUNT1 Study                                                           | Subnational                 | rural                | 20+                                   | 20+    | 36,655      | 38,145 |      |
| 635 | Norway                         | 1986-1987  | The Tromsø Study: Tromsø 3                                            | Community                   | both                 | 20-61                                 | 20-56  | 10,372      | 9,820  |      |
| 636 | Norway                         | 1994-1995  | The Tromsø Study: Tromsø 4                                            | Community                   | both                 | 25+                                   | 25+    | 12,775      | 13,864 |      |
| 637 | Norway                         | 1995-1997  | HUNT2 study                                                           | Subnational                 | rural                | 20+                                   | 20+    | 30,297      | 33,836 |      |
| 638 | Norway                         | 2001-2002  | The Tromsø Study: Tromsø 5, Tromsø Study Panel                        | Community                   | both                 | 30-89                                 | 30-89  | 2,542       | 3,594  |      |
| 639 | Norway                         | 2006-2008  | HUNT3 Study                                                           | Subnational                 | rural                | 20+                                   | 20+    | 20,011      | 24,068 |      |
| 640 | Norway                         | 2007-2008  | The Tromsø Study: Tromsø 6                                            | Community                   | both                 | 30-87                                 | 30-87  | 6,014       | 6,868  |      |
| 641 | Occupied Palestinian Territory | 1996-1998  | Old Ramallah, urban                                                   | Community                   | urban                | 15-64                                 | 15-64  | 182         | 494    |      |
| 642 | Occupied Palestinian Territory | 1996-1998  | Kobar, rural                                                          | Community                   | rural                | 15-64                                 | 15-64  | 206         | 483    |      |
| 643 | Occupied Palestinian Territory | 1999-2000  | the First National Health and Nutrition Survey                        | National                    | both                 | 18-64                                 | 18-64  | 1,600       | 1,704  |      |
| 644 | Occupied Palestinian Territory | 2010       | STEPS                                                                 | National                    | both                 | 15-64                                 | 15-64  | 2,566       | 4,086  |      |
| 645 | Oman                           | 2008       | Gulf Cooperation Council World Health Survey                          | National                    | both                 | 18+                                   | 18+    | 2,421       | 2,234  |      |
| 646 | Pakistan                       | 1990-1994  | National Health Survey Of Pakistan 1990-1994                          | National                    | both                 | 10+                                   | 10+    | 5,642       | 6,070  |      |
| 647 | Pakistan                       | 2005       | STEPS                                                                 | National                    | both                 | 25-65                                 | 25-65  | 800         | 1,100  |      |
| 648 | Pakistan                       | 2014       | STEPS                                                                 | Subnational                 | both                 | 18-69                                 | 18-69  | 2,988       | 3,703  |      |

|     | Country          | Data years | Survey/Study name/Citation                                                                                                                                                    | Level of representativeness | Rural, urban or both | Age range as in the NCD-RisC database |        | Sample size |        | Note |
|-----|------------------|------------|-------------------------------------------------------------------------------------------------------------------------------------------------------------------------------|-----------------------------|----------------------|---------------------------------------|--------|-------------|--------|------|
|     |                  |            |                                                                                                                                                                               |                             |                      | Male                                  | Female | Male        | Female |      |
| 649 | Palau            | 2011-2013  | STEPS                                                                                                                                                                         | National                    | both                 | 25-64                                 | 25-64  | 1,048       | 1,133  |      |
| 650 | Panama           | 2010-2011  | Prevalencia de factores de riesgo asociados a enfermedad cardiovascular 2010-2011                                                                                             | Subnational                 | both                 | 18+                                   | 18+    | 1,073       | 2,474  |      |
| 651 | Papua New Guinea | 1985-1986  | INTERSALT                                                                                                                                                                     | Community                   | rural                | 20-59                                 | 20-59  | 88          | 74     |      |
| 652 | Papua New Guinea | 2007       | STEPS                                                                                                                                                                         | National                    | both                 | 15-64                                 | 15-64  | 1,411       | 1,448  |      |
| 653 | Peru             | 2004-2005  | Encuesta Nacional de Indicadores Nutricionales, Bioquímicos, Socioeconómicos y Culturales Relacionados con las Enfermedades Crónicas Degenerativas (ENIN)                     | National                    | both                 | 20+                                   | 20+    | 2,090       | 2,103  |      |
| 654 | Peru             | 2007-2008  | PERU MIGRANT Study                                                                                                                                                            | Community                   | both                 | 35+                                   | 35+    | 406         | 442    |      |
| 655 | Peru             | 2010       | Demographic and Health Survey Peru 2010                                                                                                                                       | National                    | both                 | 50+                                   | 15+    | 7,735       | 31,501 |      |
| 656 | Peru             | 2009-2012  | CRONICAS Cohort Study                                                                                                                                                         | Subnational                 | both                 | 35+                                   | 35+    | 1,557       | 1,659  |      |
| 657 | Peru             | 2011       | Demographic and Health Survey Peru 2011                                                                                                                                       | National                    | both                 | 40+                                   | 15+    | 12,894      | 14,866 |      |
| 658 | Peru             | 2012       | Demographic and Health Survey Peru 2012                                                                                                                                       | National                    | both                 | 40+                                   | 15+    | 14,278      | 15,928 |      |
| 659 | Peru             | 2013       | DHS                                                                                                                                                                           | National                    | both                 | 15+                                   | 15+    | 15,853      | 17,680 |      |
| 660 | Peru             | 2014       | DHS                                                                                                                                                                           | National                    | both                 | 15+                                   | 15+    | 12,758      | 14,414 |      |
| 661 | Peru             | 2015       | DHS                                                                                                                                                                           | National                    | both                 | 15+                                   | 15+    | 14,798      | 17,921 |      |
| 662 | Philippines      | 1998-1999  | Cebu Longitudinal Health and Nutrition Survey 1998-1999 Mother Followup                                                                                                       | Community                   | both                 |                                       | 15-59  |             | 1,913  |      |
| 663 | Philippines      | 2002       | Cebu Longitudinal Health and Nutrition Survey 2002 Mother Followup                                                                                                            | Community                   | both                 |                                       | 32-66  |             | 2,080  |      |
| 664 | Philippines      | 2005       | Cebu Longitudinal Health and Nutrition Survey 2005 Mother Followup                                                                                                            | Community                   | both                 |                                       | 35-69  |             | 2,000  |      |
| 665 | Philippines      | 2007       | Cebu Longitudinal Health and Nutrition Survey 2007 Mother Followup                                                                                                            | Community                   | both                 |                                       | 38-71  |             | 1,974  |      |
| 666 | Poland           | 1986       | INTERSALT, Krakow                                                                                                                                                             | Community                   | urban                | 20-59                                 | 20-59  | 100         | 100    |      |
| 667 | Poland           | 1986       | INTERSALT, Warsaw                                                                                                                                                             | Community                   | urban                | 20-59                                 | 20-59  | 100         | 100    |      |
| 668 | Poland           | 1987-1988  | MONICA, Tarnobrzeg Voivodship                                                                                                                                                 | Community                   | rural                | 35-64                                 | 35-64  | 616         | 672    |      |
| 669 | Poland           | 1988-1989  | MONICA, Warsaw                                                                                                                                                                | Community                   | urban                | 35-64                                 | 35-64  | 705         | 713    |      |
| 670 | Poland           | 1989-1990  | Polish Program CINDI (CINDI Lodz 1989-1990)                                                                                                                                   | Community                   | urban                | 25-64                                 | 25-64  | 822         | 948    |      |
| 671 | Poland           | 1992-1993  | MONICA, Tarnobrzeg Voivodship                                                                                                                                                 | Community                   | rural                | 35-64                                 | 35-64  | 621         | 696    |      |
| 672 | Poland           | 1993       | MONICA, Warsaw                                                                                                                                                                | Community                   | urban                | 35-64                                 | 35-64  | 751         | 763    |      |
| 673 | Poland           | 1995-1996  | Polish Program CINDI (CINDI Lodz 1995)                                                                                                                                        | Community                   | urban                | 17-64                                 | 17-64  | 987         | 1,465  |      |
| 674 | Poland           | 2000       | The health status, risk factors of chronic diseases and health behaviors of residents of Torun (CINDI Torun 2000)                                                             | Community                   | urban                | 16-83                                 | 16-83  | 988         | 1,057  |      |
| 675 | Poland           | 2001-2002  | The health status, risk factors of chronic diseases and health behaviors of residents of Lodz (CINDI Lodz 2001)                                                               | Community                   | urban                | 18-64                                 | 18-64  | 997         | 838    |      |
| 676 | Poland           | 2002       | The health status, risk factors of chronic diseases and health behaviors of residents of Lodz - seniors (CINDI Lodz 2002)                                                     | Community                   | urban                | 65+                                   | 65+    | 291         | 538    |      |
| 677 | Poland           | 2002       | NATPOL                                                                                                                                                                        | National                    | both                 | 18+                                   | 18+    | 1,017       | 1,302  |      |
| 678 | Poland           | 2003       | The European Male Ageing Study                                                                                                                                                | Community                   | both                 | 40+                                   |        | 407         |        |      |
| 679 | Poland           | 2002-2005  | Health, Alcohol and Psychosocial factors In Eastern Europe                                                                                                                    | Community                   | urban                | 45-69                                 | 45-69  | 4,454       | 4,715  |      |
| 680 | Poland           | 2003-2005  | National Multicenter Health Survey in Poland. Project WOBASZ                                                                                                                  | National                    | both                 | 20-74                                 | 20-74  | 6,311       | 6,967  |      |
| 681 | Poland           | 2006       | The health, risk factors for chronic diseases, attitudes and behaviors of health residents of Torun (CINDI Torun 2006)                                                        | Community                   | urban                | 15-65                                 | 15-65  | 790         | 1,146  |      |
| 682 | Poland           | 2003-2013  | Mogielica Human Ecology Study                                                                                                                                                 | Community                   | rural                | 21+                                   | 21+    | 349         | 893    |      |
| 683 | Poland           | 2008       | The European Male Ageing Study                                                                                                                                                | Community                   | both                 | 40+                                   |        | 311         |        |      |
| 684 | Poland           | 2007-2011  | Medical, psychological and socioeconomic aspects of aging in Poland (PolSenior)                                                                                               | National                    | both                 | 55+                                   | 55+    | 2,877       | 2,756  |      |
| 685 | Poland           | 2011       | NATPOL                                                                                                                                                                        | National                    | both                 | 18-79                                 | 18-79  | 1,168       | 1,244  |      |
| 686 | Poland           | 2013-2014  | National Multicenter Health Survey in Poland. Project WOBASZ II                                                                                                               | National                    | both                 | 20+                                   | 20+    | 2,752       | 3,371  |      |
| 687 | Poland           | 2015-2016  | LIPIDOGRAM2015 & LIPIDOGEN2015 Study - National epidemiological study of lipid disorders and selected risk factors of cardiovascular disease in primary health care in Poland | National                    | both                 | 18+                                   | 18+    | 5,034       | 8,690  |      |
| 688 | Portugal         | 1986       | INTERSALT                                                                                                                                                                     | Community                   | both                 | 20-59                                 | 20-59  | 99          | 99     |      |
| 689 | Portugal         | 1999-2003  | EPIPorto Study                                                                                                                                                                | Community                   | urban                | 18+                                   | 18+    | 888         | 1,424  |      |
| 690 | Portugal         | 2010-2012  | Exercise for Elderly                                                                                                                                                          | Community                   | urban                | 60-84                                 | 60-84  | 47          | 104    |      |
| 691 | Qatar            | 2006       | World Health Survey                                                                                                                                                           | National                    | both                 | 18+                                   | 18+    | 1,885       | 2,043  |      |
| 692 | Qatar            | 2012       | STEPS                                                                                                                                                                         | National                    | both                 | 18-64                                 | 18-64  | 1,039       | 1,355  |      |
| 693 | Romania          | 2011-2012  | Study for the Evaluation of Prevalence of Hypertension and Cardiovascular Risk among the Adult Population of Romania - SEPHAR II                                              | National                    | both                 | 18-80                                 | 18-80  | 1,038       | 936    |      |

|     | Country               | Data years | Survey/Study name/Citation                                                                                                       | Level of representativeness | Rural, urban or both | Age range as in the NCD-RisC database |        | Sample size |        | Note |
|-----|-----------------------|------------|----------------------------------------------------------------------------------------------------------------------------------|-----------------------------|----------------------|---------------------------------------|--------|-------------|--------|------|
|     |                       |            |                                                                                                                                  |                             |                      | Male                                  | Female | Male        | Female |      |
| 694 | Romania               | 2015-2016  | Study for the Evaluation of Prevalence of Hypertension and cArdivascular Risk among the Adult Population of Romania - SEPHAR III | National                    | both                 | 18-80                                 | 18-80  | 936         | 1,034  |      |
| 695 | Russian Federation    | 1984-1986  | MONICA, Moscow, Cheremushkinsky district                                                                                         | Community                   | urban                | 35-64                                 | 35-64  | 600         | 600    |      |
| 696 | Russian Federation    | 1984-1986  | MONICA, Moscow (control)                                                                                                         | Community                   | urban                | 35-64                                 | 35-64  | 774         | 642    |      |
| 697 | Russian Federation    | 1984-1986  | MONICA, Moscow, Leninsky district                                                                                                | Community                   | urban                | 35-64                                 | 35-64  | 553         | 622    |      |
| 698 | Russian Federation    | 1985       | MONICA, Novosibirsk (intervention)                                                                                               | Community                   | urban                | 25-64                                 | 25-64  | 797         | 818    |      |
| 699 | Russian Federation    | 1985-1986  | MONICA, Novosibirsk, Kirowsky district                                                                                           | Community                   | urban                | 25-64                                 | 25-64  | 758         | 774    |      |
| 700 | Russian Federation    | 1985-1986  | MONICA, Novosibirsk, Leninsky district                                                                                           | Community                   | urban                | 25-64                                 | 25-64  | 624         | 628    |      |
| 701 | Russian Federation    | 1986       | INTERSALT                                                                                                                        | Community                   | urban                | 20-59                                 | 20-59  | 97          | 97     |      |
| 702 | Russian Federation    | 1988       | MONICA, Novosibirsk (intervention)                                                                                               | Community                   | urban                | 25-64                                 | 25-64  | 840         | 853    |      |
| 703 | Russian Federation    | 1988-1989  | MONICA, Moscow (control)                                                                                                         | Community                   | urban                | 35-64                                 | 35-64  | 621         | 581    |      |
| 704 | Russian Federation    | 1988-1989  | MONICA, Moscow, Leninsky district                                                                                                | Community                   | urban                | 35-64                                 | 35-64  | 597         | 613    |      |
| 705 | Russian Federation    | 1988-1989  | MONICA, Novosibirsk, Kirowsky district                                                                                           | Community                   | urban                | 25-64                                 | 25-64  | 876         | 805    |      |
| 706 | Russian Federation    | 1992       | Russian Karelia Survey in Pitkaranta                                                                                             | Community                   | both                 | 25-64                                 | 25-64  | 380         | 454    |      |
| 707 | Russian Federation    | 1992-1993  | Russia Longitudinal Monitoring Survey-Higher School of Economics Round II                                                        | National                    | both                 | 10+                                   | 10+    | 4,799       | 6,411  |      |
| 708 | Russian Federation    | 1992-1995  | MONICA, Moscow, Leninsky district                                                                                                | Community                   | urban                | 35-64                                 | 35-64  | 537         | 858    |      |
| 709 | Russian Federation    | 1992-1995  | MONICA, Moscow (control)                                                                                                         | Community                   | urban                | 35-64                                 | 35-64  | 557         | 527    |      |
| 710 | Russian Federation    | 1993       | Russia Longitudinal Monitoring Survey-Higher School of Economics Round III                                                       | National                    | both                 | 10+                                   | 10+    | 5,420       | 7,191  |      |
| 711 | Russian Federation    | 1993-1994  | Russia Longitudinal Monitoring Survey-Higher School of Economics Round IV                                                        | National                    | both                 | 10+                                   | 10+    | 4,985       | 6,597  |      |
| 712 | Russian Federation    | 1994-1995  | MONICA, Novosibirsk (intervention)                                                                                               | Community                   | urban                | 25-64                                 | 25-64  | 822         | 865    |      |
| 713 | Russian Federation    | 1995       | MONICA, Novosibirsk, Kirowsky district                                                                                           | Community                   | urban                | 25-64                                 | 25-64  | 771         | 787    |      |
| 714 | Russian Federation    | 1997       | Russian Karelia Survey in Pitkaranta                                                                                             | Community                   | both                 | 25-64                                 | 25-64  | 309         | 440    |      |
| 715 | Russian Federation    | 2002       | Russian Karelia Survey in Pitkaranta                                                                                             | Community                   | both                 | 25-64                                 | 25-64  | 258         | 342    |      |
| 716 | Russian Federation    | 2002-2005  | Health, Alcohol and Psychosocial factors In Eastern Europe                                                                       | Community                   | urban                | 45-69                                 | 45-69  | 4,205       | 5,039  |      |
| 717 | Russian Federation    | 2007       | Russian Karelia Survey in Pitkaranta                                                                                             | Community                   | both                 | 25-64                                 | 25-64  | 176         | 277    |      |
| 718 | Russian Federation    | 2007-2010  | SAGE                                                                                                                             | National                    | both                 | 50+                                   | 50+    | 1,350       | 2,464  |      |
| 719 | Russian Federation    | 2015-2016  | Ural Eye and Medical Study (UEMS)                                                                                                | Subnational                 | rural                | 40+                                   | 40+    | 816         | 1,371  |      |
| 720 | Russian Federation    | 2015-2016  | Ural Eye and Medical Study (UEMS)                                                                                                | Subnational                 | urban                | 40+                                   | 40+    | 706         | 1,353  |      |
| 721 | Rwanda                | 2012       | STEPS                                                                                                                            | National                    | both                 | 15-64                                 | 15-64  | 2,650       | 4,244  |      |
| 722 | Saint Kitts and Nevis | 2007       | STEPS                                                                                                                            | Subnational                 | both                 | 25-64                                 | 25-64  | 454         | 794    |      |
| 723 | Saint Lucia           | 2012       | STEPS                                                                                                                            | National                    | both                 | 25-64                                 | 25-64  | 573         | 918    |      |
| 724 | Samoa                 | 1995       | McGarvey ST. Cardiovascular disease (CVD) risk factors in Samoa and American Samoa, 1990-95. Pac Health Dialog 2001; 8: 157-62   | National                    | both                 | 25+                                   | 25+    | 144         | 151    |      |
| 725 | Samoa                 | 2002       | STEPS                                                                                                                            | National                    | both                 | 25-64                                 | 25-64  | 1,197       | 1,346  |      |
| 726 | Samoa                 | 2010       | Samoa Genome-Wide Association Study                                                                                              | National                    | both                 | 24-65                                 | 24-65  | 1,396       | 2,043  |      |
| 727 | Samoa                 | 2013       | STEPS                                                                                                                            | National                    | both                 | 18-64                                 | 18-64  | 604         | 901    |      |
| 728 | Sao Tome and Principe | 2009       | STEPS                                                                                                                            | National                    | both                 | 25-64                                 | 25-64  | 1,047       | 1,322  |      |
| 729 | Saudi Arabia          | 2007       | Gulf Cooperation Council World Health Survey                                                                                     | National                    | both                 | 18+                                   | 18+    | 4,906       | 3,701  |      |
| 730 | Saudi Arabia          | 2011-2013  | Jeddah City Study                                                                                                                | Community                   | urban                | 10+                                   | 10+    | 817         | 823    |      |
| 731 | Saudi Arabia          | 2013       | Saudi Health Information Survey                                                                                                  | National                    | both                 | 15+                                   | 15+    | 5,194       | 5,411  |      |
| 732 | Serbia                | 1988-1989  | MONICA, Novi Sad                                                                                                                 | Community                   | urban                | 25-64                                 | 25-64  | 778         | 791    |      |
| 733 | Serbia                | 1994-1995  | MONICA, Novi Sad                                                                                                                 | Community                   | urban                | 25-64                                 | 25-64  | 600         | 670    |      |
| 734 | Serbia                | 2000       | Health Status, Health Needs and Utilization of Health Care of the Population of Serbia                                           | National                    | both                 | 10+                                   | 10+    | 4,812       | 5,915  |      |
| 735 | Serbia                | 2006       | The 2006 National Health Survey for the Population of Serbia                                                                     | National                    | both                 | 10+                                   | 10+    | 7,683       | 8,558  |      |
| 736 | Serbia                | 2013       | The National Health Survey 2013                                                                                                  | National                    | both                 | 15+                                   | 15+    | 6,586       | 7,630  |      |
| 737 | Serbia                | 2013-2014  | Stay Fit for Lifelong Health; The Prevalence of Lifestyle Health Conditions in Serbian Population                                | National                    | urban                | 18-65                                 |        | 1,367       |        |      |
| 738 | Seychelles            | 1989       | Seychelles Heart Survey I                                                                                                        | National                    | both                 | 25-64                                 | 25-64  | 513         | 568    |      |
| 739 | Seychelles            | 1994       | Seychelles Heart Survey II                                                                                                       | National                    | both                 | 25-64                                 | 25-64  | 504         | 563    |      |
| 740 | Seychelles            | 2004       | Seychelles Heart Survey III                                                                                                      | National                    | both                 | 25-64                                 | 25-64  | 568         | 687    |      |
| 741 | Seychelles            | 2013-2014  | Seychelles Heart Survey IV                                                                                                       | National                    | both                 | 25-64                                 | 25-64  | 531         | 699    |      |
| 742 | Sierra Leone          | 2009       | STEPS                                                                                                                            | National                    | both                 | 25-64                                 | 25-64  | 2,214       | 2,332  |      |

|     | Country         | Data years | Survey/Study name/Citation                                                                                                                          | Level of representativeness | Rural, urban or both | Age range as in the NCD-RisC database |        | Sample size |           | Note |
|-----|-----------------|------------|-----------------------------------------------------------------------------------------------------------------------------------------------------|-----------------------------|----------------------|---------------------------------------|--------|-------------|-----------|------|
|     |                 |            |                                                                                                                                                     |                             |                      | Male                                  | Female | Male        | Female    |      |
| 743 | Singapore       | 1993-1995  | NUH Heart Study                                                                                                                                     | National                    | both                 | 26+                                   | 26+    | 498         | 484       |      |
| 744 | Singapore       | 2004-2007  | Combined follow up of Singapore Cardiovascular Cohort study and Singapore Prospective study                                                         | National                    | both                 | 24+                                   | 24+    | 2,467       | 2,666     |      |
| 745 | Singapore       | 2009       | Social Isolation, Health and Lifestyles Survey (SIHLS) 2009                                                                                         | National                    | both                 | 60+                                   | 60+    | 2,050       | 2,438     |      |
| 746 | Singapore       | 2009-2011  | The Singapore Chinese Eye Study                                                                                                                     | Community                   | both                 | 40+                                   | 40+    | 1,662       | 1,691     |      |
| 747 | Singapore       | 2012-2013  | Singapore Health Study 2012                                                                                                                         | National                    | both                 | 18-79                                 | 18-79  | 958         | 1,026     |      |
| 748 | Slovakia        | 1993       | Countrywide Integrated Noncommunicable Diseases Intervention Programme                                                                              | National                    | both                 | 15-64                                 | 15-64  | 877         | 1,290     |      |
| 749 | Slovakia        | 1998       | Countrywide Integrated Noncommunicable Diseases Intervention Programme                                                                              | National                    | both                 | 15-64                                 | 15-64  | 923         | 1,122     |      |
| 750 | Slovakia        | 2003       | Countrywide Integrated Noncommunicable Diseases Intervention Programme                                                                              | National                    | both                 | 15-64                                 | 15-64  | 664         | 904       |      |
| 751 | Slovakia        | 2008       | Countrywide Integrated Noncommunicable Diseases Intervention Programme                                                                              | National                    | both                 | 15-64                                 | 15-64  | 412         | 584       |      |
| 752 | Slovakia        | 2011-2012  | European Health Examination Survey                                                                                                                  | National                    | both                 | 18-64                                 | 18-64  | 885         | 1,080     |      |
| 753 | Solomon Islands | 2006       | STEPS                                                                                                                                               | Subnational                 | both                 | 15-64                                 | 15-64  | 1,032       | 1,376     |      |
| 754 | Solomon Islands | 2009-2010  | Influences of the large-scale disaster and related socioecological changes on people's nutritional status and health in the Western Solomon Islands | Subnational                 | rural                | 18+                                   | 18+    | 153         | 215       |      |
| 755 | Solomon Islands | 2015       | STEPS                                                                                                                                               | National                    | both                 | 18-69                                 | 18-69  | 841         | 1,010     |      |
| 756 | South Africa    | 1998       | Demographic and Health Survey South Africa 1998                                                                                                     | National                    | both                 | 15+                                   | 15+    | 5,659       | 7,704     |      |
| 757 | South Africa    | 2003       | Demographic and Health Survey South Africa 2003                                                                                                     | National                    | both                 | 15+                                   | 15+    | 3,265       | 4,566     |      |
| 758 | South Africa    | 2003-2004  | Africa Centre Biomeasure Survey                                                                                                                     | Community                   | rural                | 25-49                                 | 25-49  | 790         | 1,758     |      |
| 759 | South Africa    | 2007-2008  | SAGE                                                                                                                                                | National                    | both                 | 50+                                   | 50+    | 1,584       | 2,138     |      |
| 760 | South Africa    | 2008       | National Income Dynamics Study Wave I                                                                                                               | National                    | both                 | 15+                                   | 15+    | 5,562       | 8,198     |      |
| 761 | South Africa    | 2008-2009  | Cape Town Bellville South Cohort Study - Baseline evaluation I                                                                                      | Community                   | urban                | 16+                                   | 16+    | 220         | 710       |      |
| 762 | South Africa    | 2010       | Africa Centre Biomeasure Survey                                                                                                                     | Community                   | rural                | 15+                                   | 15+    | 3,466       | 7,819     |      |
| 763 | South Africa    | 2010-2011  | National Income Dynamics Study Wave II                                                                                                              | National                    | both                 | 15+                                   | 15+    | 6,208       | 8,760     |      |
| 764 | South Africa    | 2012       | National Income Dynamics Study Wave III                                                                                                             | National                    | both                 | 15+                                   | 15+    | 7,428       | 10,610    |      |
| 765 | South Africa    | 2014-2015  | Health and Aging in Africa: A Longitudinal Study of an INDEPTH Community in South Africa (HAALSI)                                                   | Community                   | rural                | 40+                                   | 40+    | 2,243       | 2,603     |      |
| 766 | South Korea     | 1986       | INTERSALT                                                                                                                                           | Community                   | urban                | 20-59                                 | 20-59  | 100         | 98        |      |
| 767 | South Korea     | 1998       | Korea National Health and Nutrition Examination Survey                                                                                              | National                    | both                 | 10+                                   | 10+    | 4,514       | 5,193     |      |
| 768 | South Korea     | 2001       | Korea National Health and Nutrition Examination Survey                                                                                              | National                    | both                 | 10+                                   | 10+    | 3,269       | 3,998     |      |
| 769 | South Korea     | 2002-2003  | Korean National Health Insurance                                                                                                                    | National                    | both                 | 40+                                   | 40+    | 3,002,129   | 2,506,319 |      |
| 770 | South Korea     | 2004-2005  | Korean National Health Insurance                                                                                                                    | National                    | both                 | 40+                                   | 40+    | 3,613,977   | 3,288,304 |      |
| 771 | South Korea     | 2005       | Korea National Health and Nutrition Examination Survey                                                                                              | National                    | both                 | 10+                                   | 10+    | 2,863       | 3,589     |      |
| 772 | South Korea     | 2006-2007  | Korean National Health Insurance                                                                                                                    | National                    | both                 | 40+                                   | 40+    | 4,358,877   | 4,402,085 |      |
| 773 | South Korea     | 2007       | Korea National Health and Nutrition Examination Survey                                                                                              | National                    | both                 | 10+                                   | 10+    | 1,547       | 1,998     |      |
| 774 | South Korea     | 2008       | Korea National Health and Nutrition Examination Survey                                                                                              | National                    | both                 | 10+                                   | 10+    | 3,480       | 4,478     |      |
| 775 | South Korea     | 2008-2009  | Korean National Health Insurance                                                                                                                    | National                    | both                 | 40+                                   | 40+    | 5,521,545   | 5,785,937 |      |
| 776 | South Korea     | 2009       | Korea National Health and Nutrition Examination Survey                                                                                              | National                    | both                 | 10+                                   | 10+    | 3,915       | 4,839     |      |
| 777 | South Korea     | 2010       | Korea National Health and Nutrition Examination Survey                                                                                              | National                    | both                 | 10+                                   | 10+    | 3,264       | 4,021     |      |
| 778 | South Korea     | 2010-2011  | Korean National Health Insurance                                                                                                                    | National                    | both                 | 40+                                   | 40+    | 6,688,661   | 7,149,463 |      |
| 779 | South Korea     | 2011       | Korea National Health and Nutrition Examination Survey                                                                                              | National                    | both                 | 10+                                   | 10+    | 3,104       | 3,941     |      |
| 780 | South Korea     | 2012       | Korea National Health and Nutrition Examination Survey                                                                                              | National                    | both                 | 10+                                   | 10+    | 2,924       | 3,826     |      |
| 781 | South Korea     | 2012-2013  | Korean National Health Insurance                                                                                                                    | National                    | both                 | 40+                                   | 40+    | 7,270,222   | 7,800,669 |      |
| 782 | South Korea     | 2013       | Korea National Health and Nutrition Examination Survey                                                                                              | National                    | both                 | 10+                                   | 10+    | 2,934       | 3,686     |      |
| 783 | South Korea     | 2014       | Korea National Health and Nutrition Examination Survey                                                                                              | National                    | both                 | 10+                                   | 10+    | 2,727       | 3,551     |      |
| 784 | South Korea     | 2014-2015  | Korean National Health Insurance                                                                                                                    | National                    | both                 | 40+                                   | 40+    | 7,881,544   | 8,371,302 |      |
| 785 | South Korea     | 2015       | Korea National Health and Nutrition Examination Survey                                                                                              | National                    | both                 | 10+                                   | 10+    | 2,816       | 3,432     |      |
| 786 | Spain           | 1985       | INTERSALT, Manresa                                                                                                                                  | Community                   | urban                | 20-59                                 | 20-59  | 100         | 100       |      |
| 787 | Spain           | 1986       | INTERSALT, Torrejo                                                                                                                                  | Community                   | urban                | 20-59                                 | 20-59  | 100         | 100       |      |
| 788 | Spain           |            | Plans et al., Med Clin (Barc) 1992; 98: 369-72                                                                                                      | Community                   | urban                | 15+                                   | 15+    |             |           |      |
| 789 | Spain           | 1986-1988  | MONICA, Catalonia                                                                                                                                   | Community                   | urban                | 25-64                                 | 25-64  | 1,252       | 1,271     |      |
| 790 | Spain           | 1989       | Cardiovascular Risk Factors Study in Catalonia                                                                                                      | Subnational                 | both                 | 15-85                                 | 15-85  | 330         | 372       |      |
| 791 | Spain           | 1990       | Blood pressure in Spain: distribution, awareness, control, and benefits of a reduction in average pressure. Hypertension 1998; 32: 998-1002         | National                    | both                 | 35-65                                 | 35-65  | 810         | 1,211     |      |

|     | Country     | Data years | Survey/Study name/Citation                                                                                                                                                           | Level of representativeness | Rural, urban or both | Age range as in the NCD-RisC database |        | Sample size |        | Note |
|-----|-------------|------------|--------------------------------------------------------------------------------------------------------------------------------------------------------------------------------------|-----------------------------|----------------------|---------------------------------------|--------|-------------|--------|------|
|     |             |            |                                                                                                                                                                                      |                             |                      | Male                                  | Female | Male        | Female |      |
| 792 | Spain       | 1990-1992  | MONICA, Catalonia                                                                                                                                                                    | Community                   | urban                | 25-64                                 | 25-64  | 1,720       | 1,192  |      |
| 793 | Spain       | 1991-1993  | Encuesta de Factores de Riesgo Cardiovascular en la Región de Murcia (Cardiovascular Risk Factors Survey)                                                                            | Subnational                 | both                 | 18-69                                 | 18-69  | 1,512       | 1,573  |      |
| 794 | Spain       | 1994-1995  | Encuesta de Nutrición y Salud Comunidad Valenciana 1994-95 (ENCV)                                                                                                                    | Subnational                 | urban                | 15+                                   | 15+    | 813         | 957    |      |
| 795 | Spain       | 1994-1996  | MONICA, Catalonia                                                                                                                                                                    | Community                   | urban                | 25-64                                 | 25-64  | 1,802       | 1,631  |      |
| 796 | Spain       | 1999-2000  | Factores de riesgo en las islas Baleares: Estudio CORSAIB                                                                                                                            | Subnational                 | both                 | 35-74                                 | 35-74  | 801         | 856    |      |
| 797 | Spain       | 2000-2001  | EUREYE Study                                                                                                                                                                         | Subnational                 | both                 | 65+                                   | 65+    | 274         | 324    |      |
| 798 | Spain       | 2000-2001  | Influence of childhood socioeconomic circumstances, height, and obesity on pulse pressure and systolic and diastolic blood pressure in older people. J Hum Hypertens 2006; 20: 73-82 | National                    | both                 | 60+                                   | 60+    | 1,408       | 2,461  |      |
| 799 | Spain       | 2001-2002  | Catalan Health Interview Survey                                                                                                                                                      | Subnational                 | both                 | 18-74                                 | 18-74  | 606         | 760    |      |
| 800 | Spain       | 2001-2003  | DIabetes, Nutrición y Obesidad en la población adulta de la Región de Murcia (DINO)                                                                                                  | Subnational                 | both                 | 20+                                   | 20+    | 717         | 834    |      |
| 801 | Spain       | 2000-2003  | CDC of the Canary Islands                                                                                                                                                            | Subnational                 | both                 | 18-75                                 | 18-75  | 2,889       | 4,033  |      |
| 802 | Spain       | 2003       | The European Male Ageing Study                                                                                                                                                       | Community                   | both                 | 40+                                   |        | 406         |        |      |
| 803 | Spain       | 2003-2005  | Registre Gironi del Cor (REGICOR)                                                                                                                                                    | Subnational                 | both                 | 35-79                                 | 35-79  | 2,964       | 3,289  |      |
| 804 | Spain       | 2004       | Cardiovascular Risk Study in Castilla y León (RECCyL)                                                                                                                                | Subnational                 | both                 | 15+                                   | 15+    | 1,913       | 2,073  |      |
| 805 | Spain       | 2004-2006  | PREVICTUS                                                                                                                                                                            | National                    | both                 | 60+                                   | 60+    | 3,416       | 3,915  |      |
| 806 | Spain       | 2007-2009  | Harmonizing Equation of Risk in Mediterranean countries EXTremadura                                                                                                                  | Subnational                 | both                 | 25-79                                 | 25-79  | 1,298       | 1,498  |      |
| 807 | Spain       | 2008       | The European Male Ageing Study                                                                                                                                                       | Community                   | both                 | 40+                                   |        | 267         |        |      |
| 808 | Spain       | 2008-2010  | Study on Nutrition and Cardiovascular Risk in Spain                                                                                                                                  | National                    | both                 | 18+                                   | 18+    | 5,792       | 6,414  |      |
| 809 | Spain       | 2009       | Cardiovascular Risk Study in Castilla y León (RECCyL)                                                                                                                                | Subnational                 | both                 | 20+                                   | 20+    | 1,322       | 1,601  |      |
| 810 | Spain       | 2014       | Cardiovascular Risk Study in Castilla y León (RECCyL)                                                                                                                                | Subnational                 | both                 | 20+                                   | 20+    | 1,228       | 1,500  |      |
| 811 | Spain       | 2015       | National Study of Nutrition and Cardiovascular Risk (ENRICA)                                                                                                                         | National                    | both                 | 60+                                   | 60+    | 741         | 799    |      |
| 812 | Sri Lanka   | 2006       | STEPS                                                                                                                                                                                | National                    | both                 | 15-64                                 | 15-64  | 6,153       | 6,222  |      |
| 813 | Sri Lanka   | 2014       | STEPS                                                                                                                                                                                | National                    | both                 | 18-69                                 | 18-69  | 1,909       | 2,969  |      |
| 814 | Suriname    | 2013-2015  | The Healthy Life in Suriname Study (HELISUR)                                                                                                                                         | Subnational                 | urban                | 18-70                                 | 18-70  | 424         | 722    |      |
| 815 | Swaziland   | 2014       | STEPS                                                                                                                                                                                | National                    | both                 | 15-69                                 | 15-69  | 1,113       | 1,988  |      |
| 816 | Sweden      | 1985       | MONICA Gothenburg                                                                                                                                                                    | Community                   | urban                | 25-64                                 | 25-64  | 550         | 595    |      |
| 817 | Sweden      | 1986       | MONICA, Northern Sweden                                                                                                                                                              | Subnational                 | urban                | 25-64                                 | 25-64  | 820         | 799    |      |
| 818 | Sweden      | 1990       | MONICA Gothenburg                                                                                                                                                                    | Community                   | urban                | 25-64                                 | 25-64  | 766         | 766    |      |
| 819 | Sweden      | 1990       | MONICA, Northern Sweden                                                                                                                                                              | Subnational                 | urban                | 25-64                                 | 25-64  | 764         | 794    |      |
| 820 | Sweden      | 1985-1996  | EPIC Umea                                                                                                                                                                            | Subnational                 | both                 | 24-72                                 | 24-72  | 12,139      | 12,985 |      |
| 821 | Sweden      | 1991-1996  | Malmö Diet and Cancer                                                                                                                                                                | Community                   | urban                | 45-73                                 | 45-73  | 12,101      | 18,291 |      |
| 822 | Sweden      | 1994       | MONICA, Northern Sweden                                                                                                                                                              | Subnational                 | urban                | 25-64                                 | 25-64  | 736         | 769    |      |
| 823 | Sweden      | 1995       | MONICA Gothenburg                                                                                                                                                                    | Community                   | urban                | 25-64                                 | 25-64  | 741         | 863    |      |
| 824 | Sweden      | 1999       | MONICA Northern Sweden                                                                                                                                                               | Subnational                 | both                 | 25-74                                 | 25-74  | 889         | 934    |      |
| 825 | Sweden      | 2001-2004  | Swedish INTERGENE Cohort Study                                                                                                                                                       | Subnational                 | both                 | 24-76                                 | 24-76  | 1,691       | 1,905  |      |
| 826 | Sweden      | 2003       | The European Male Ageing Study                                                                                                                                                       | Community                   | both                 | 40+                                   |        | 397         |        |      |
| 827 | Sweden      | 2004       | MONICA Northern Sweden                                                                                                                                                               | Subnational                 | both                 | 25-74                                 | 25-74  | 910         | 957    |      |
| 828 | Sweden      | 2008       | The European Male Ageing Study                                                                                                                                                       | Community                   | both                 | 40+                                   |        | 370         |        |      |
| 829 | Sweden      | 2009       | MONICA Northern Sweden                                                                                                                                                               | Subnational                 | both                 | 25-74                                 | 25-74  | 850         | 872    |      |
| 830 | Sweden      | 2014       | MONICA Northern Sweden                                                                                                                                                               | Subnational                 | both                 | 25-74                                 | 25-74  | 756         | 806    |      |
| 831 | Switzerland | 1984-1986  | The Swiss MONICA Study Wave I                                                                                                                                                        | Subnational                 | both                 | 25-74                                 | 25-74  | 1,749       | 1,692  |      |
| 832 | Switzerland | 1988-1989  | The Swiss MONICA Study Wave II                                                                                                                                                       | Subnational                 | both                 | 25-74                                 | 25-74  | 1,775       | 1,683  |      |
| 833 | Switzerland | 1992-1993  | The Swiss MONICA Study Wave III                                                                                                                                                      | Subnational                 | both                 | 25-74                                 | 25-74  | 1,570       | 1,670  |      |
| 834 | Switzerland | 2003-2006  | Cohorte Lausannoise                                                                                                                                                                  | Community                   | urban                | 35-75                                 | 35-75  | 3,185       | 3,531  |      |
| 835 | Switzerland | 2007-2012  | Bus Santé Study                                                                                                                                                                      | Subnational                 | both                 | 20-80                                 | 20-80  | 1,886       | 1,913  |      |
| 836 | Switzerland | 2009-2012  | Cohorte Lausannoise                                                                                                                                                                  | Community                   | urban                | 40-81                                 | 40-81  | 2,199       | 2,507  |      |
| 837 | Taiwan      | 1985       | INTERSALT                                                                                                                                                                            | Community                   | rural                | 20-59                                 | 20-59  | 89          | 92     |      |
| 838 | Taiwan      | 1993-1994  | The Kinmen Neurological Disorders Survey                                                                                                                                             | Community                   | urban                | 50+                                   | 50+    | 1,446       | 1,338  |      |
| 839 | Taiwan      | 1993-1996  | Nutrition and Health Survey in Taiwan 1993-1996                                                                                                                                      | National                    | both                 | 10+                                   | 10+    | 3,988       | 3,990  |      |
| 840 | Taiwan      | 1999-2000  | Nutrition and Health Survey in Taiwan 1999-2000                                                                                                                                      | National                    | both                 | 65+                                   | 65+    | 1,277       | 1,217  |      |
| 841 | Taiwan      | 2002       | Taiwanese Survey on Hypertension, Hyperglycemia and Hyperlipidemia                                                                                                                   | National                    | both                 | 15+                                   | 15+    | 3,335       | 3,606  |      |

|     | Country              | Data years | Survey/Study name/Citation                                                                                     | Level of representative-ness | Rural, urban or both | Age range as in the NCD-RisC database |        | Sample size |        | Note |
|-----|----------------------|------------|----------------------------------------------------------------------------------------------------------------|------------------------------|----------------------|---------------------------------------|--------|-------------|--------|------|
|     |                      |            |                                                                                                                |                              |                      | Male                                  | Female | Male        | Female |      |
| 842 | Taiwan               | 2005-2008  | Nutrition and Health Survey in Taiwan 2005-2008                                                                | National                     | both                 | 19+                                   | 19+    | 1,342       | 1,402  |      |
| 843 | Taiwan               | 2007       | Taiwanese Survey on Hypertension, Hyperglycemia and Hyperlipidemia                                             | National                     | both                 | 20+                                   | 20+    | 2,160       | 2,468  |      |
| 844 | Taiwan               | 2013-2016  | Nutrition And Health Survey in Taiwan                                                                          | National                     | both                 | 10+                                   | 10+    | 2,152       | 2,221  |      |
| 845 | Tajikistan           | 2016       | STEPS                                                                                                          | National                     | both                 | 18-69                                 | 18-69  | 1,092       | 1,554  |      |
| 846 | Tanzania             | 1998-1999  | Bovet et al., Int J Epidemiol 2002; 31: 240-7                                                                  | Community                    | urban                | 25-64                                 | 25-64  | 3,600       | 5,653  |      |
| 847 | Tanzania             | 2011       | STEPS                                                                                                          | Subnational                  | both                 | 25-64                                 | 25-64  | 1,007       | 1,504  |      |
| 848 | Tanzania             | 2012       | STEPS                                                                                                          | National                     | both                 | 25-64                                 | 25-64  | 2,585       | 2,834  |      |
| 849 | Tanzania             | 2014       | Dar es Salaam Urban Cohort Hypertension Study                                                                  | Community                    | urban                | 40+                                   | 40+    | 971         | 1,271  |      |
| 850 | Thailand             | 1991       | Thailand National Health Examination Survey I                                                                  | National                     | both                 | 15+                                   | 15+    | 6,238       | 8,689  |      |
| 851 | Thailand             | 1997       | Thailand National Health Examination Survey II                                                                 | National                     | both                 | 10+                                   | 10+    | 4,195       | 5,680  |      |
| 852 | Thailand             | 2000       | InterASIA                                                                                                      | National                     | both                 | 35+                                   | 35+    | 2,093       | 3,212  |      |
| 853 | Thailand             | 2004       | Thailand National Health Examination Survey III                                                                | National                     | both                 | 15+                                   | 15+    | 18,900      | 20,244 |      |
| 854 | Thailand             | 2009       | Thailand National Health Examination Survey IV                                                                 | National                     | both                 | 15+                                   | 15+    | 9,718       | 10,615 |      |
| 855 | Timor-Leste          | 2014       | STEPS                                                                                                          | National                     | both                 | 18-69                                 | 18-69  | 1,066       | 1,452  |      |
| 856 | Togo                 | 2010       | STEPS                                                                                                          | National                     | both                 | 15-64                                 | 15-64  | 2,023       | 2,026  |      |
| 857 | Tokelau              | 2005       | STEPS                                                                                                          | National                     | both                 | 15-64                                 | 15-64  | 270         | 295    |      |
| 858 | Tokelau              | 2014       | STEPS                                                                                                          | National                     | both                 | 18-64                                 | 18-64  | 256         | 279    |      |
| 859 | Tonga                | 2004       | STEPS                                                                                                          | National                     | both                 | 15-64                                 | 15-64  | 404         | 554    |      |
| 860 | Tonga                | 2011       | STEPS                                                                                                          | National                     | both                 | 15-64                                 | 15-64  | 884         | 1,412  |      |
| 861 | Trinidad and Tobago  | 1985       | INTERSALT                                                                                                      | Community                    | urban                | 20-59                                 | 20-59  | 84          | 92     |      |
| 862 | Trinidad and Tobago  | 2001       | Adult Survey                                                                                                   | National                     | rural                | 25+                                   | 25+    | 204         | 267    |      |
| 863 | Tunisia              | 1996-1997  | Ariana Healthy Project 1997                                                                                    | Community                    | both                 | 35-65                                 | 35-65  | 2,655       | 2,724  |      |
| 864 | Tunisia              | 1996-1997  | Tunisian National Nutrition Survey 1996-1997                                                                   | National                     | both                 | 10+                                   | 10+    | 2,164       | 3,549  |      |
| 865 | Tunisia              | 2005       | Tunisian National Survey                                                                                       | National                     | both                 | 35-70                                 | 35-70  | 3,417       | 4,590  |      |
| 866 | Tunisia              | 2009-2010  | ObeMaghreb                                                                                                     | Subnational                  | urban                | 10-49                                 | 10-49  | 1,515       | 1,273  |      |
| 867 | Turkey               | 1990       | Turkish Adult Risk Factor Study                                                                                | National                     | both                 | 20+                                   | 20+    | 1,344       | 1,372  |      |
| 868 | Turkey               | 1995       | Turkish Adult Risk Factor Study                                                                                | National                     | both                 | 25+                                   | 25+    | 864         | 894    |      |
| 869 | Turkey               | 1998       | Turkish Adult Risk Factor Study                                                                                | National                     | both                 | 28+                                   | 28+    | 883         | 915    |      |
| 870 | Turkey               | 2000       | Turkish Adult Risk Factor Study                                                                                | National                     | both                 | 30+                                   | 30+    | 905         | 952    |      |
| 871 | Turkey               | 2001-2002  | Turkish Adult Risk Factor Study                                                                                | National                     | both                 | 32+                                   | 32+    | 1,137       | 1,252  |      |
| 872 | Turkey               | 2003       | Prevalence, awareness, treatment and control of hypertension in Turkey in 2003                                 | National                     | both                 | 18+                                   | 18+    | 2,019       | 2,891  |      |
| 873 | Turkey               | 2003-2004  | Turkish Adult Risk Factor Study                                                                                | National                     | both                 | 34+                                   | 34+    | 1,106       | 1,150  |      |
| 874 | Turkey               | 2003-2005  | Prevalence of diabetes and associated risk factors among adult population in Trabzon city                      | Subnational                  | both                 | 20+                                   | 20+    | 2,208       | 2,601  |      |
| 875 | Turkey               | 2005-2006  | Turkish Adult Risk Factor Study                                                                                | National                     | both                 | 33+                                   | 33+    | 1,031       | 1,091  |      |
| 876 | Turkey               | 2007-2008  | Turkish Adult Risk Factor Study                                                                                | National                     | both                 | 35+                                   | 35+    | 1,134       | 1,148  |      |
| 877 | Turkey               | 2009-2010  | Turkish Adult Risk Factor Study                                                                                | National                     | both                 | 37+                                   | 37+    | 1,490       | 1,555  |      |
| 878 | Turkey               | 2011       | Chronic Diseases and Risk Factors Survey in Turkey                                                             | National                     | both                 | 15+                                   | 15+    | 7,995       | 8,906  |      |
| 879 | Turkey               | 2012-2013  | Turkish Adult Risk Factor Study                                                                                | National                     | both                 | 37+                                   | 37+    | 1,030       | 1,110  |      |
| 880 | Turkey               | 2014-2015  | Turkish Adult Risk Factor Study                                                                                | National                     | both                 | 44+                                   | 44+    | 746         | 768    |      |
| 881 | Turkmenistan         | 2013       | STEPS                                                                                                          | National                     | both                 | 18-64                                 | 18-64  | 1,931       | 2,886  |      |
| 882 | Uganda               | 2011-2012  | The Prevalence and Distribution of Non-communicable Diseases and Their Risk Factors in Kasese District, Uganda | Subnational                  | both                 | 25-79                                 | 25-79  | 284         | 234    |      |
| 883 | Uganda               | 2014       | STEPS                                                                                                          | National                     | both                 | 18-69                                 | 18-69  | 1,570       | 2,132  |      |
| 884 | Ukraine              | 2007       | Demographic and Health Survey Ukraine 2007                                                                     | National                     | both                 | 15-49                                 | 15-49  | 2,555       | 5,537  |      |
| 885 | United Arab Emirates | 2009       | Gulf Cooperation Council World Health Survey                                                                   | National                     | both                 | 18+                                   | 18+    | 624         | 679    |      |
| 886 | United Kingdom       | 1984-1986  | Scottish Heart Health Survey                                                                                   | Subnational                  | both                 | 40-59                                 | 40-59  | 4,385       | 4,471  |      |
| 887 | United Kingdom       | 1985       | INTERSALT, Birmingham                                                                                          | Community                    | urban                | 20-59                                 | 20-59  | 100         | 100    |      |
| 888 | United Kingdom       | 1985       | INTERSALT, Wales                                                                                               | Community                    | urban                | 20-59                                 | 20-59  | 100         | 99     |      |
| 889 | United Kingdom       | 1985-1986  | INTERSALT, Belfast                                                                                             | Community                    | urban                | 20-59                                 | 20-59  | 99          | 100    |      |
| 890 | United Kingdom       | 1986-1987  | MONICA, Belfast                                                                                                | Subnational                  | both                 | 25-64                                 | 25-64  | 1,164       | 1,185  |      |
| 891 | United Kingdom       | 1986-1987  | Dietary and Nutritional Survey of British Adults 1986-1987                                                     | National                     | both                 | 16-64                                 | 16-64  | 1,190       | 1,182  |      |



|     | Country        | Data years | Survey/Study name/Citation                            | Level of representativeness | Rural, urban or both | Age range as in the NCD-RisC database |        | Sample size |        | Note |
|-----|----------------|------------|-------------------------------------------------------|-----------------------------|----------------------|---------------------------------------|--------|-------------|--------|------|
|     |                |            |                                                       |                             |                      | Male                                  | Female | Male        | Female |      |
| 892 | United Kingdom | 1987-1988  | Edinburgh Artery Study                                | Community                   | urban                | 54-75                                 | 54-75  | 808         | 783    |      |
| 893 | United Kingdom | 1991-1992  | MONICA, Belfast                                       | Subnational                 | both                 | 25-64                                 | 25-64  | 999         | 997    |      |
| 894 | United Kingdom | 1991-1992  | Health Survey for England                             | National                    | both                 | 16+                                   | 16+    | 2,951       | 3,319  |      |
| 895 | United Kingdom | 1992       | MONICA, Glasgow                                       | Community                   | urban                | 25-64                                 | 25-64  | 704         | 779    |      |
| 896 | United Kingdom | 1992-1994  | Edinburgh Artery Study                                | Community                   | urban                | 60-81                                 | 60-81  | 580         | 580    |      |
| 897 | United Kingdom | 1993       | Health Survey for England                             | National                    | both                 | 16+                                   | 16+    | 6,745       | 7,489  |      |
| 898 | United Kingdom | 1994       | Health Survey for England                             | National                    | both                 | 16+                                   | 16+    | 6,223       | 7,178  |      |
| 899 | United Kingdom | 1993-1997  | EPIC Norfolk                                          | Subnational                 | both                 | 40-79                                 | 40-79  | 11,551      | 13,961 |      |
| 900 | United Kingdom | 1994-1995  | National Diet and Nutrition Survey (NDNS)             | National                    | both                 | 65+                                   | 65+    | 743         | 730    |      |
| 901 | United Kingdom | 1995       | MONICA, Glasgow                                       | Community                   | urban                | 25-64                                 | 25-64  | 857         | 958    |      |
| 902 | United Kingdom | 1995       | Scottish Health Survey (SHeS)                         | Subnational                 | both                 | 16-64                                 | 16-64  | 3,104       | 3,747  |      |
| 903 | United Kingdom | 1995       | Health Survey for England                             | National                    | both                 | 10+                                   | 10+    | 6,977       | 7,954  |      |
| 904 | United Kingdom | 1996       | Health Survey for England                             | National                    | both                 | 10+                                   | 10+    | 7,280       | 8,309  |      |
| 905 | United Kingdom | 1993-2000  | EPIC Oxford                                           | Subnational                 | both                 | 20-98                                 | 20-98  | 2,444       | 8,923  |      |
| 906 | United Kingdom | 1997       | Health Survey for England                             | National                    | both                 | 10+                                   | 10+    | 4,771       | 5,261  |      |
| 907 | United Kingdom | 1997-1999  | INTERMAP, WestBromwich                                | Community                   | urban                | 40-59                                 | 40-59  | 141         | 138    |      |
| 908 | United Kingdom | 1998       | Health Survey for England                             | National                    | both                 | 10+                                   | 10+    | 6,767       | 7,828  |      |
| 909 | United Kingdom | 1998       | Scottish Health Survey (SHeS)                         | Subnational                 | both                 | 10-74                                 | 10-74  | 3,958       | 4,781  |      |
| 910 | United Kingdom | 1998-1999  | INTERMAP, Belfast                                     | Community                   | urban                | 40-59                                 | 40-59  | 125         | 97     |      |
| 911 | United Kingdom | 1998-2000  | The British Regional Heart Study                      | National                    | urban                | 60-79                                 |        | 4,141       |        |      |
| 912 | United Kingdom | 1999-2001  | Edinburgh Artery Study                                | Community                   | urban                | 66-87                                 | 66-87  | 373         | 404    |      |
| 913 | United Kingdom | 1999-2001  | British Women's Heart and Health Study                | National                    | both                 |                                       | 60-79  |             | 3,801  |      |
| 914 | United Kingdom | 2000       | Health Survey for England                             | National                    | both                 | 16+                                   | 16+    | 3,301       | 4,197  |      |
| 915 | United Kingdom | 1999-2004  | Hertfordshire Cohort Study                            | Subnational                 | both                 | 59-73                                 | 59-73  | 1,574       | 1,411  |      |
| 916 | United Kingdom | 2000-2001  | National Diet and Nutrition Survey 2000-2001          | National                    | both                 | 19-64                                 | 19-64  | 797         | 939    |      |
| 917 | United Kingdom | 2001       | Health Survey for England                             | National                    | both                 | 10+                                   | 10+    | 6,156       | 7,191  |      |
| 918 | United Kingdom | 2002       | Health Survey for England                             | National                    | both                 | 10+                                   | 10+    | 4,818       | 5,725  |      |
| 919 | United Kingdom | 2003       | Scottish Health Survey (SHeS)                         | Subnational                 | both                 | 10+                                   | 10+    | 2,790       | 3,407  |      |
| 920 | United Kingdom | 2003       | Health Survey for England                             | National                    | both                 | 10+                                   | 10+    | 5,566       | 6,683  |      |
| 921 | United Kingdom | 2003       | The European Male Ageing Study                        | Community                   | both                 | 40+                                   |        | 396         |        |      |
| 922 | United Kingdom | 2004-2005  | English Longitudinal Study of Ageing Wave 2 2004-2005 | National                    | both                 | 52+                                   | 52+    | 3,404       | 4,159  |      |
| 923 | United Kingdom | 2005       | Health Survey for England                             | National                    | both                 | 10+                                   | 10+    | 3,518       | 4,239  |      |
| 924 | United Kingdom | 2006       | Health Survey for England                             | National                    | both                 | 10+                                   | 10+    | 5,123       | 6,088  |      |
| 925 | United Kingdom | 2007       | Health Survey for England                             | National                    | both                 | 10+                                   | 10+    | 2,427       | 2,879  |      |
| 926 | United Kingdom | 2008       | Health Survey for England                             | National                    | both                 | 10+                                   | 10+    | 5,170       | 6,194  |      |
| 927 | United Kingdom | 2008       | The European Male Ageing Study                        | Community                   | both                 | 40+                                   |        | 315         |        |      |
| 928 | United Kingdom | 2008       | Scottish Health Survey (SHeS)                         | Subnational                 | both                 | 16+                                   | 16+    | 492         | 601    |      |
| 929 | United Kingdom | 2008-2009  | English Longitudinal Study of Ageing Wave 4 2008-2009 | National                    | both                 | 50+                                   | 50+    | 3,833       | 4,630  |      |
| 930 | United Kingdom | 2009       | Scottish Health Survey (SHeS)                         | Subnational                 | both                 | 16+                                   | 16+    | 472         | 623    |      |
| 931 | United Kingdom | 2009       | Health Survey for England                             | National                    | both                 | 10+                                   | 10+    | 1,450       | 1,733  |      |
| 932 | United Kingdom | 2008-2012  | National Diet and Nutrition Survey (NDNS)             | National                    | both                 | 10+                                   | 10+    | 1,037       | 1,241  |      |
| 933 | United Kingdom | 2010       | Health Survey for England                             | National                    | both                 | 10+                                   | 10+    | 2,611       | 3,283  |      |
| 934 | United Kingdom | 2010       | Scottish Health Survey (SHeS)                         | Subnational                 | both                 | 16+                                   | 16+    | 443         | 584    |      |
| 935 | United Kingdom | 2011       | Scottish Health Survey (SHeS)                         | Subnational                 | both                 | 16+                                   | 16+    | 421         | 536    |      |
| 936 | United Kingdom | 2011       | Health Survey for England                             | National                    | both                 | 10+                                   | 10+    | 2,648       | 3,313  |      |
| 937 | United Kingdom | 2012       | Scottish Health Survey (SHeS)                         | Subnational                 | both                 | 16+                                   | 16+    | 430         | 535    |      |
| 938 | United Kingdom | 2012       | Health Survey for England                             | National                    | both                 | 10+                                   | 10+    | 2,548       | 3,196  |      |
| 939 | United Kingdom | 2012-2013  | English Longitudinal Study of Ageing Wave 6 2012-2013 | National                    | both                 | 50+                                   | 50+    | 3,528       | 4,284  |      |
| 940 | United Kingdom | 2013       | Scottish Health Survey (SHeS)                         | Subnational                 | both                 | 16+                                   | 16+    | 529         | 654    |      |
| 941 | United Kingdom | 2013       | Health Survey for England                             | National                    | both                 | 10+                                   | 10+    | 2,932       | 3,632  |      |
| 942 | United Kingdom | 2013-2014  | National Diet and Nutrition Survey (NDNS)             | National                    | both                 | 10+                                   | 10+    | 623         | 844    |      |

|     | Country                  | Data years | Survey/Study name/Citation                                | Level of representativeness | Rural, urban or both | Age range as in the NCD-RisC database |        | Sample size |        | Note |
|-----|--------------------------|------------|-----------------------------------------------------------|-----------------------------|----------------------|---------------------------------------|--------|-------------|--------|------|
|     |                          |            |                                                           |                             |                      | Male                                  | Female | Male        | Female |      |
| 943 | United Kingdom           | 2014       | Scottish Health Survey (SHeS)                             | Subnational                 | both                 | 16+                                   | 16+    | 550         | 712    |      |
| 944 | United Kingdom           | 2014       | Health Survey for England                                 | National                    | both                 | 10+                                   | 10+    | 2,657       | 3,168  |      |
| 945 | United Kingdom           | 2015       | Scottish Health Survey (SHeS)                             | Subnational                 | both                 | 16+                                   | 16+    | 385         | 492    |      |
| 946 | United States of America | 1983-1987  | Framingham Heart Study (FHS) - Offspring Cohort           | Community                   | urban                | 24-72                                 | 24-72  | 1,819       | 1,965  |      |
| 947 | United States of America | 1985-1986  | MONICA, Stanford                                          | Subnational                 | urban                | 25-64                                 | 25-64  | 703         | 824    | 5    |
| 948 | United States of America | 1985-1986  | Coronary Artery Risk Development in Young Adults (CARDIA) | Subnational                 | urban                | 18-30                                 | 18-30  | 2,327       | 2,785  |      |
| 949 | United States of America | 1985-1986  | INTERSALT, Chicago                                        | Community                   | urban                | 20-59                                 | 20-59  | 97          | 99     |      |
| 950 | United States of America | 1986       | INTERSALT, Goodman                                        | Community                   | urban                | 20-59                                 | 20-59  | 192         | 192    |      |
| 951 | United States of America | 1986       | INTERSALT, Jackson                                        | Community                   | urban                | 20-59                                 | 20-59  | 184         | 199    |      |
| 952 | United States of America | 1985-1988  | Framingham Heart Study (FHS)                              | Community                   | urban                | 65-93                                 | 65-96  | 559         | 881    |      |
| 953 | United States of America | 1986-1990  | Framingham Heart Study (FHS)                              | Community                   | urban                | 68-95                                 | 67-97  | 499         | 802    |      |
| 954 | United States of America | 1987-1988  | Coronary Artery Risk Development in Young Adults (CARDIA) | Subnational                 | urban                | 20-32                                 | 20-32  | 2,089       | 2,531  |      |
| 955 | United States of America | 1987-1989  | Atherosclerosis Risk in Communities Study (ARIC)          | Subnational                 | both                 | 44-66                                 | 44-66  | 8,153       | 6,784  |      |
| 956 | United States of America | 1987-1991  | Framingham Heart Study (FHS) - Offspring Cohort           | Community                   | urban                | 28-76                                 | 28-76  | 1,886       | 2,039  |      |
| 957 | United States of America | 1988-1992  | Framingham Heart Study (FHS)                              | Community                   | urban                | 69-97                                 | 69-99  | 430         | 780    |      |
| 958 | United States of America | 1989-1990  | MONICA, Stanford                                          | Subnational                 | urban                | 25-64                                 | 25-64  | 655         | 754    | 5    |
| 959 | United States of America | 1988-1994  | US NHANES III                                             | National                    | both                 | 17+                                   | 17+    | 8,966       | 9,843  |      |
| 960 | United States of America | 1990-1992  | Atherosclerosis Risk in Communities Study (ARIC)          | Subnational                 | both                 | 46-70                                 | 47-70  | 7,415       | 6,120  |      |
| 961 | United States of America | 1991-1995  | Framingham Heart Study (FHS) - Offspring Cohort           | Community                   | urban                | 31-78                                 | 31-78  | 1,742       | 1,969  |      |
| 962 | United States of America | 1993-1995  | Atherosclerosis Risk in Communities Study (ARIC)          | Subnational                 | both                 | 50-73                                 | 49-73  | 6,587       | 5,529  |      |
| 963 | United States of America | 1993-1998  | Women's Health Initiative Study (WHI OS)                  | National                    | both                 |                                       | 50-79  |             | 93,545 |      |
| 964 | United States of America | 1995-1996  | Coronary Artery Risk Development in Young Adults (CARDIA) | Subnational                 | urban                | 28-40                                 | 28-40  | 1,754       | 2,182  |      |
| 965 | United States of America | 1995-1996  | Bogalusa Heart Study (BHS)                                | Community                   | rural                | 20-37                                 | 20-37  | 549         | 843    |      |
| 966 | United States of America | 1995-1998  | Framingham Heart Study (FHS) - Offspring Cohort           | Community                   | urban                | 37-80                                 | 37-80  | 1,603       | 1,829  |      |
| 967 | United States of America | 1996-1997  | INTERMAP, Jackson                                         | Community                   | urban                | 40-59                                 | 40-59  | 132         | 134    |      |
| 968 | United States of America | 1996-1997  | INTERMAP, Pittsburgh                                      | Community                   | urban                | 40-59                                 | 40-59  | 132         | 128    |      |
| 969 | United States of America | 1996-1997  | Study of Women's Health Across the Nation                 | Subnational                 | both                 |                                       | 40-55  |             | 3,233  | 6    |
| 970 | United States of America | 1996-1997  | INTERMAP, Baltimore                                       | Community                   | urban                | 40-59                                 | 40-59  | 146         | 134    |      |
| 971 | United States of America | 1996-1998  | Atherosclerosis Risk in Communities Study (ARIC)          | Subnational                 | both                 | 53-75                                 | 52-75  | 6,020       | 4,880  |      |
| 972 | United States of America | 1996-1998  | INTERMAP, Minneapolis                                     | Community                   | urban                | 40-59                                 | 40-59  | 130         | 130    |      |
| 973 | United States of America | 1997-1998  | INTERMAP, CC                                              | Community                   | urban                | 40-59                                 | 40-59  | 271         | 276    |      |
| 974 | United States of America | 1997-1998  | INTERMAP, Chicago                                         | Community                   | urban                | 40-59                                 | 40-59  | 156         | 159    |      |
| 975 | United States of America | 1997-1999  | Study of Women's Health Across the Nation                 | Subnational                 | both                 |                                       | 40-55  |             | 2,840  | 6    |
| 976 | United States of America | 1998-2000  | Study of Women's Health Across the Nation                 | Subnational                 | both                 |                                       | 40-55  |             | 2,661  | 6    |
| 977 | United States of America | 1998-2001  | Framingham Heart Study (FHS) - Offspring Cohort           | Community                   | urban                | 37-89                                 | 33-90  | 1,601       | 1,887  |      |
| 978 | United States of America | 1999-2000  | US NHANES 1999-2000                                       | National                    | both                 | 10+                                   | 10+    | 3,316       | 3,276  |      |
| 979 | United States of America | 1999-2001  | Study of Women's Health Across the Nation                 | Subnational                 | both                 |                                       | 40-56  |             | 2,526  | 6    |
| 980 | United States of America | 2000-2002  | Multi-Ethnic Study of Atherosclerosis (MESA)              | Subnational                 | both                 | 45-84                                 | 45-84  | 3,210       | 3,596  |      |
| 981 | United States of America | 2000-2002  | Study of Women's Health Across the Nation                 | Subnational                 | both                 |                                       | 40-57  |             | 2,457  | 6    |
| 982 | United States of America | 2001-2002  | US NHANES 2001-2002                                       | National                    | both                 | 10+                                   | 10+    | 3,587       | 3,489  |      |
| 983 | United States of America | 2002-2004  | Multi-Ethnic Study of Atherosclerosis (MESA)              | Subnational                 | both                 | 46-87                                 | 46-86  | 2,969       | 3,261  |      |
| 984 | United States of America | 2002-2005  | Framingham Heart Study (FHS) - Third Generation Cohort    | Community                   | urban                | 19-72                                 | 19-70  | 1,904       | 2,174  |      |
| 985 | United States of America | 2003-2004  | US NHANES 2003-2004                                       | National                    | both                 | 10+                                   | 10+    | 3,376       | 3,215  |      |
| 986 | United States of America | 2004-2005  | Multi-Ethnic Study of Atherosclerosis (MESA)              | Subnational                 | both                 | 47-88                                 | 47-87  | 2,809       | 3,128  |      |
| 987 | United States of America | 2005-2006  | US NHANES 2005-2006                                       | National                    | both                 | 10+                                   | 10+    | 3,382       | 3,230  |      |
| 988 | United States of America | 2005-2006  | National Social Life Health and Aging Project             | National                    | both                 | 57-85                                 | 57-85  | 1,423       | 1,511  | 7    |
| 989 | United States of America | 2005-2007  | Multi-Ethnic Study of Atherosclerosis (MESA)              | Subnational                 | both                 | 49-90                                 | 49-89  | 2,690       | 3,008  |      |
| 990 | United States of America | 2005-2008  | Framingham Heart Study (FHS) - Offspring Cohort           | Community                   | urban                | 43-92                                 | 40-93  | 1,349       | 1,648  |      |
| 991 | United States of America | 2007-2008  | US NHANES 2007-2008                                       | National                    | both                 | 10+                                   | 10+    | 3,468       | 3,432  |      |
| 992 | United States of America | 2009-2010  | US NHANES 2009-2010                                       | National                    | both                 | 10+                                   | 10+    | 3,677       | 3,687  |      |
| 993 | United States of America | 2010-2011  | National Social Life Health and Aging Project             | National                    | both                 | 36-99                                 | 36-99  | 1,484       | 1,791  | 7    |

|      | Country                  | Data years | Survey/Study name/Citation                                                                                                                                                                      | Level of representativeness | Rural, urban or both | Age range as in the NCD-RisC database |        | Sample size |        | Note |
|------|--------------------------|------------|-------------------------------------------------------------------------------------------------------------------------------------------------------------------------------------------------|-----------------------------|----------------------|---------------------------------------|--------|-------------|--------|------|
|      |                          |            |                                                                                                                                                                                                 |                             |                      | Male                                  | Female | Male        | Female |      |
| 994  | United States of America | 2011-2012  | US NHANES 2011-2012                                                                                                                                                                             | National                    | both                 | 10+                                   | 10+    | 3,318       | 3,269  |      |
| 995  | United States of America | 2013-2014  | US NHANES 2013-2014                                                                                                                                                                             | National                    | both                 | 10+                                   | 10+    | 3,447       | 3,624  |      |
| 996  | Uruguay                  | 2006       | STEPS                                                                                                                                                                                           | National                    | both                 | 25-64                                 | 25-64  | 261         | 644    |      |
| 997  | Uruguay                  | 2011-2012  | Detection and follow-up of cardiovascular disease and risk factors in the Southern Cone of Latin America. The CESCAS I Study                                                                    | Community                   | urban                | 35-74                                 | 35-74  | 652         | 932    |      |
| 998  | Uruguay                  | 2012-2016  | Genotype, Phenotype and Environment of Hypertension in Uruguay (GEFA-HT-UY)                                                                                                                     | Community                   | urban                | 19+                                   | 19+    | 128         | 190    |      |
| 999  | Uzbekistan               | 2002       | Demographic and Health Survey Uzbekistan 2002                                                                                                                                                   | National                    | both                 | 15-59                                 | 15-49  | 2,331       | 5,225  |      |
| 1000 | Uzbekistan               | 2014       | STEPS                                                                                                                                                                                           | National                    | both                 | 18-64                                 | 18-64  | 1,539       | 2,170  |      |
| 1001 | Vanuatu                  | 2005       | STEPS                                                                                                                                                                                           | Subnational                 | both                 | 15-60                                 | 15-60  | 631         | 763    |      |
| 1002 | Vanuatu                  | 2011       | STEPS                                                                                                                                                                                           | National                    | both                 | 25-64                                 | 25-64  | 2,283       | 2,205  |      |
| 1003 | Venezuela                | 2005-2006  | Brajkovich et al. Prevalencia de sobrepeso y obesidad en una poblacion de Catia La Mar (Edo.Vargas) y Municipio Sucre Distrito Metropolitano de Caracas, Rev Ven Endoc Metab 2006; 4 (3): 31-32 | Community                   | urban                | 20-65                                 | 20-65  | 200         | 432    |      |
| 1004 | Venezuela                | 2007-2008  | Venezuelan Study of Metabolic Syndrome, Obesity and Lifestyle (VEMSOLS)                                                                                                                         | Community                   | urban                | 20+                                   | 20+    | 107         | 232    |      |
| 1005 | Venezuela                | 2008-2009  | Venezuelan Study of Metabolic Syndrome, Obesity and Lifestyle (VEMSOLS)                                                                                                                         | Community                   | rural                | 20+                                   | 20+    | 51          | 87     |      |
| 1006 | Venezuela                | 2010-2011  | Venezuelan Study of Metabolic Syndrome, Obesity and Lifestyle (VEMSOLS)                                                                                                                         | Community                   | urban                | 20+                                   | 20+    | 66          | 192    |      |
| 1007 | Venezuela                | 2015-2017  | Cardio-Metabolic Health Venezuelan Study (EVESCAM)                                                                                                                                              | National                    | both                 | 20+                                   | 20+    | 1,062       | 2,351  |      |
| 1008 | Viet Nam                 | 2001-2002  | Viet Nam National Health Survey 2001-2002                                                                                                                                                       | National                    | both                 | 16+                                   | 16+    | 46,381      | 52,804 |      |
| 1009 | Viet Nam                 | 2005       | National Adult Overweight Survey                                                                                                                                                                | National                    | both                 | 25-64                                 | 25-64  | 8,474       | 8,725  |      |
| 1010 | Viet Nam                 | 2005       | Non-communicable disease risk factors in Ho Chi Minh City                                                                                                                                       | Community                   | urban                | 25-64                                 | 25-64  | 906         | 1,058  |      |
| 1011 | Viet Nam                 | 2008-2009  | The survey on diabetes and its risk factors in 2 northern provinces of Vietnam (DM-S)                                                                                                           | Subnational                 | both                 | 25+                                   | 25+    | 830         | 1,446  |      |
| 1012 | Viet Nam                 | 2009       | STEPS                                                                                                                                                                                           | National                    | both                 | 25-64                                 | 25-64  | 6,740       | 7,806  |      |
| 1013 | Viet Nam                 | 2012       | National Survey of Diabetes in Vietnam                                                                                                                                                          | National                    | both                 | 30-69                                 | 30-69  | 5,319       | 5,855  |      |
| 1014 | Viet Nam                 | 2015       | STEPS                                                                                                                                                                                           | National                    | both                 | 18-69                                 | 18-69  | 1,319       | 1,723  |      |
| 1015 | Yemen                    | 2007-2009  | Hypertension and Diabetes in Yemen (HYDY)                                                                                                                                                       | National                    | urban                | 10-70                                 | 10-70  | 2,840       | 2,927  |      |
| 1016 | Yemen                    | 2007-2009  | Hypertension and Diabetes in Yemen (HYDY)                                                                                                                                                       | National                    | rural                | 10-70                                 | 10-70  | 2,842       | 2,875  |      |
| 1017 | Zambia                   | 2008       | STEPS                                                                                                                                                                                           | Community                   | urban                | 25+                                   | 25+    | 632         | 1,220  |      |
| 1018 | Zimbabwe                 | 1985-1986  | INTERSALT                                                                                                                                                                                       | Community                   | urban                | 20-59                                 | 20-59  | 100         | 95     |      |

1. This research uses data from China Health and Nutrition Survey (CHNS). We thank the National Institute of Nutrition and Food Safety, China Center for Disease Control and Prevention, Carolina Population Center (5 R24 HD050924), the University of North Carolina at Chapel Hill, the NIH (R01-HD30880, DK056350, R24HD050924, and R01-HD38700) and the Fogarty International Center, NIH for financial support for the CHNS data collection and analysis files from 1989 to 2011 and future surveys, and the China-Japan Friendship Hospital, Ministry of Health for support for CHNS 2009.

2. The bibliographic citation for this data source is: Pelaez, Martha, Alberto Palloni, Cecilia Albala, Juan C. Alfonso, Roberto Ham-Chande, Anselm Hennis, Maria Lucia Lebrao, Esther Lesn-Diaz, Edith Pantelides, and Omar Prats. SABE - SURVEY ON HEALTH, WELL-BEING, AND AGING IN LATIN AMERICA AND THE CARIBBEAN, 2000 [Computer file]. ICPSR version. Washington, D.C.: Pan American Health Organization/World Health Organization (PAHO/WHO) [producers], 2004. Ann Arbor, MI: Inter-university Consortium for Political and Social Research [distributor], 2005.

3. The Golestan Cohort Study was funded by Tehran University of Medical Sciences number 81/15.

4. The Longitudinal Aging Study Amsterdam is supported by a grant from the Netherlands Ministry of Health Welfare and Sports, Directorate of Long-Term Care.

5. We thank Prof Stephen Fortmann for data from the Stanford Five-City Project.

6. The bibliographic citation for this data source is: Sutton-Tyrrell, Kim, Faith Selzer, MaryFran Sowers, Robert Neer, Lynda Powell, Ellen Gold, Gail Greendale, Gerson Weiss, Karen Matthews, and Sonja McKinlay. Study of Women's Health Across the Nation (SWAN), 1996-1997: Baseline Dataset. ICPSR28762-v2. Ann Arbor, MI: Inter-university Consortium for Political and Social Research[distributor], 2014-02-04. <http://doi.org/10.3886/ICPSR28762.v2>

7. The bibliographic citation for this data source is: Waite, Linda J., Kathleen Cagney, William Dale, Elbert Huang, Edward O. Laumann, Martha McClintock, Colm A. O'Muircheartaigh, L. Phillip Schumm, and Benjamin Cornwell. National Social Life, Health, and Aging Project (NSHAP): Wave 2 and Partner Data Collection. ICPSR34921-v1. Ann Arbor, MI: Inter-university Consortium for Political and Social Research [distributor], 2014-04-29. <https://doi.org/10.3886/ICPSR34921.v1>

**Supplementary Table 5.** Coefficients of the regression of the probit-transformed prevalence of raised blood pressure on mean systolic and diastolic blood pressure for women.

| Variable                      | Coefficient (95% CI)      |
|-------------------------------|---------------------------|
| Intercept                     | -0.48 (-0.51, -0.44)      |
| Mean SBP (mm Hg)              | 0.028 (0.022, 0.034)      |
| Mean DBP (mm Hg)              | 0.035 (0.026, 0.044)      |
| Age group (years)             |                           |
| 20-29                         | -0.39 (-0.54, -0.25)      |
| 30-39                         | -0.22 (-0.31, -0.13)      |
| 40-49                         | -0.093 (-0.15, -0.041)    |
| 50-59                         | Reference                 |
| 60-69                         | 0.088 (0.040, 0.14)       |
| 70-79                         | 0.14 (0.068, 0.20)        |
| Decade                        |                           |
| 2005-2015                     | Reference                 |
| 1995-2004                     | 0.052 (0.012, 0.092)      |
| 1985-1994                     | 0.077 (0.028, 0.12)       |
| Mean SBP * age group          |                           |
| 20-29                         | -0.011 (-0.023, 0.0012)   |
| 30-39                         | -0.0061 (-0.017, 0.0051)  |
| 40-49                         | -0.0024 (-0.012, 0.0070)  |
| 50-59                         | Reference                 |
| 60-69                         | 0.0069 (-0.0018, 0.015)   |
| 70-79                         | 0.010 (0.0028, 0.018)     |
| Mean DBP * age group          |                           |
| 20-29                         | 0.029 (0.012, 0.046)      |
| 30-39                         | 0.023 (0.0064, 0.038)     |
| 40-49                         | 0.011 (-0.0038, 0.025)    |
| 50-59                         | Reference                 |
| 60-69                         | -0.013 (-0.024, -6.7e-06) |
| 70-79                         | -0.022 (-0.033, -0.011)   |
| Mean SBP * decade             |                           |
| 2005-2015                     | Reference                 |
| 1995-2004                     | 0.0063 (-0.0046, 0.016)   |
| 1985-1994                     | 0.0019 (-0.0076, 0.012)   |
| Mean DBP * decade             |                           |
| 2005-2015                     | Reference                 |
| 1995-2004                     | -0.0052 (-0.020, 0.010)   |
| 1985-1994                     | 0.0014 (-0.014, 0.017)    |
| Decade * age group            |                           |
| 2005-2015                     | Reference                 |
| 1995-2004                     |                           |
| 20-29                         | 0.096 (-0.17, 0.36)       |
| 30-39                         | 0.036 (-0.13, 0.20)       |
| 40-49                         | 0.026 (-0.067, 0.12)      |
| 50-59                         | Reference                 |
| 60-69                         | 0.043 (-0.060, 0.15)      |
| 70-79                         | 0.031 (-0.099, 0.16)      |
| 1985-1994                     |                           |
| 20-29                         | -0.26 (-0.61, 0.088)      |
| 30-39                         | -0.0064 (-0.16, 0.15)     |
| 40-49                         | 0.0042 (-0.082, 0.092)    |
| 50-59                         | Reference                 |
| 60-69                         | -0.012 (-0.14, 0.11)      |
| 70-79                         | 0.067 (-0.15, 0.28)       |
| Mean SBP * decade * age group |                           |
| 2005-2015                     | Reference                 |

|                               |                          |
|-------------------------------|--------------------------|
| 1995-2004                     |                          |
| 20-29                         | 0.011 (-0.0074, 0.029)   |
| 30-39                         | 0.0021 (-0.015, 0.019)   |
| 40-49                         | -0.00055 (-0.017, 0.016) |
| 50-59                         | Reference                |
| 60-69                         | -0.0098 (-0.025, 0.0055) |
| 70-79                         | -0.0084 (-0.021, 0.0051) |
| 1985-1994                     |                          |
| 20-29                         | 0.0063 (-0.015, 0.028)   |
| 30-39                         | 0.0057 (-0.013, 0.024)   |
| 40-49                         | 0.0018 (-0.014, 0.018)   |
| 50-59                         | Reference                |
| 60-69                         | 0.0016 (-0.013, 0.017)   |
| 70-79                         | -0.0037 (-0.019, 0.012)  |
| Mean DBP * decade * age group |                          |
| 2005-2015                     | Reference                |
| 1995-2004                     |                          |
| 20-29                         | -0.016 (-0.041, 0.0095)  |
| 30-39                         | -0.0063 (-0.030, 0.017)  |
| 40-49                         | 0.0038 (-0.020, 0.027)   |
| 50-59                         | Reference                |
| 60-69                         | 0.0055 (-0.015, 0.026)   |
| 70-79                         | 0.0083 (-0.011, 0.027)   |
| 1985-1994                     |                          |
| 20-29                         | -0.046 (-0.080, -0.010)  |
| 30-39                         | -0.017 (-0.042, 0.011)   |
| 40-49                         | -0.0071 (-0.031, 0.017)  |
| 50-59                         | Reference                |
| 60-69                         | -0.0047 (-0.029, 0.019)  |
| 70-79                         | 0.0048 (-0.021, 0.030)   |

Traditional  $R^2$  is not clearly defined for mixed effect models. The conditional  $R^2$  for the model, which describes the proportion of variance explained by both fixed and random factors (1), is 0.918 (median of the results from the 1,000 simulated datasets).

SBP = systolic blood pressure. DBP = diastolic blood pressure.

Mean SBP is centred at 130 mm Hg, and mean DBP is centred at 80 mm Hg.

\* denotes statistical interaction.

**Supplementary Table 6.** Coefficients of the regression of the probit-transformed prevalence of raised blood pressure on mean systolic and diastolic blood pressure for men.

| Variable                      | Coefficient (95% CI)      |
|-------------------------------|---------------------------|
| Intercept                     | -0.49 (-0.52, -0.45)      |
| Mean SBP (mm Hg)              | 0.025 (0.020, 0.031)      |
| Mean DBP (mm Hg)              | 0.042 (0.033, 0.051)      |
| Age group (years)             |                           |
| 20-29                         | -0.24 (-0.33, -0.17)      |
| 30-39                         | -0.16 (-0.21, -0.11)      |
| 40-49                         | -0.10 (-0.15, -0.060)     |
| 50-59                         | Reference                 |
| 60-69                         | 0.086 (0.036, 0.14)       |
| 70-79                         | 0.15 (0.088, 0.22)        |
| Decade                        |                           |
| 2005-2015                     | Reference                 |
| 1995-2004                     | 0.00093 (-0.052, 0.054)   |
| 1985-1994                     | 0.034 (-0.026, 0.093)     |
| Mean SBP * age group          |                           |
| 20-29                         | 0.013 (0.0035, 0.023)     |
| 30-39                         | 0.0031 (-0.0055, 0.011)   |
| 40-49                         | -0.0011 (-0.0094, 0.0072) |
| 50-59                         | Reference                 |
| 60-69                         | 0.0094 (-9.2e-5, 0.017)   |
| 70-79                         | 0.012 (0.0045, 0.019)     |
| Mean DBP * age group          |                           |
| 20-29                         | -0.012 (-0.026, 0.0016)   |
| 30-39                         | 0.0062 (-0.0070, 0.019)   |
| 40-49                         | 0.0074 (-0.0062, 0.021)   |
| 50-59                         | Reference                 |
| 60-69                         | -0.015 (-0.028, -0.00067) |
| 70-79                         | -0.021 (-0.033, -0.0091)  |
| Mean SBP * decade             |                           |
| 2005-2015                     | Reference                 |
| 1995-2004                     | 0.0036 (-0.0080, 0.015)   |
| 1985-1994                     | 0.0077 (-0.0025, 0.018)   |
| Mean DBP * decade             |                           |
| 2005-2015                     | Reference                 |
| 1995-2004                     | 0.0041 (-0.014, 0.022)    |
| 1985-1994                     | -0.0015 (-0.017, 0.014)   |
| Decade * age group            |                           |
| 2005-2015                     | Reference                 |
| 1995-2004                     |                           |
| 20-29                         | 0.17 (0.016, 0.32)        |
| 30-39                         | 0.070 (-0.023, 0.16)      |
| 40-49                         | 0.046 (-0.039, 0.13)      |
| 50-59                         | Reference                 |
| 60-69                         | 0.082 (-0.021, 0.19)      |
| 70-79                         | 0.053 (-0.079, 0.19)      |
| 1985-1994                     |                           |
| 20-29                         | 0.073 (-0.11, 0.26)       |
| 30-39                         | 0.074 (-0.020, 0.17)      |
| 40-49                         | 0.043 (-0.052, 0.14)      |
| 50-59                         | Reference                 |
| 60-69                         | 0.067 (-0.054, 0.19)      |
| 70-79                         | 0.091 (-0.093, 0.28)      |
| Mean SBP * decade * age group |                           |
| 2005-2015                     | Reference                 |

|                               |                          |
|-------------------------------|--------------------------|
| 1995-2004                     |                          |
| 20-29                         | 0.0059 (-0.010, 0.022)   |
| 30-39                         | 0.0014 (-0.014, 0.016)   |
| 40-49                         | 0.0039 (-0.012, 0.020)   |
| 50-59                         | Reference                |
| 60-69                         | -0.0082 (-0.025, 0.0085) |
| 70-79                         | -0.0050 (-0.019, 0.0096) |
| 1985-1994                     |                          |
| 20-29                         | 0.0040 (-0.014, 0.021)   |
| 30-39                         | -0.0024 (-0.018, 0.013)  |
| 40-49                         | -0.0027 (-0.018, 0.013)  |
| 50-59                         | Reference                |
| 60-69                         | -0.010 (-0.027, 0.0064)  |
| 70-79                         | -0.013 (-0.029, 0.0028)  |
| Mean DBP * decade * age group |                          |
| 2005-2015                     | Reference                |
| 1995-2004                     |                          |
| 20-29                         | -0.0011 (-0.025, 0.023)  |
| 30-39                         | -0.0032 (-0.027, 0.020)  |
| 40-49                         | -0.0041 (-0.030, 0.021)  |
| 50-59                         | Reference                |
| 60-69                         | 0.00097 (-0.025, 0.027)  |
| 70-79                         | -0.0055 (-0.028, 0.018)  |
| 1985-1994                     |                          |
| 20-29                         | -0.010 (-0.038, 0.018)   |
| 30-39                         | 0.00022 (-0.022, 0.023)  |
| 40-49                         | 0.00017 (-0.023, 0.024)  |
| 50-59                         | Reference                |
| 60-69                         | 0.0047 (-0.022, 0.032)   |
| 70-79                         | 0.0057 (-0.022, 0.033)   |

Traditional  $R^2$  is not clearly defined for mixed effect models. The conditional  $R^2$  for the model, which describes the proportion of variance explained by both fixed and random factors (1), is 0.871 (median of the results from the 1,000 simulated datasets).

SBP = systolic blood pressure. DBP = diastolic blood pressure.

Mean SBP is centred at 130 mm Hg, and mean DBP is centred at 80 mm Hg.

\* denotes statistical interaction.

## References

1. Nakagawa S, Schielzeth H. A general and simple method for obtaining R<sup>2</sup> from generalized linear mixed-effects models. *Methods Ecol Evol.* 2013;4(2):133-42.
